# Supplementary material for: Selective defluorinative [4 + 3] annulation to access fluorinated oxazepines and thiazepines
Source: Royal Society of Chemistry journal article supplement (doi:10.1039/d5qo01324k), 2025-12-09

## Supporting Information

### Selective Defluorinative [4+3] Annulation to Access Fluorinated Oxazepines and Thiazepines

Firdous Farah, Akbar Sohail, Ping Jiang, Keyume Ablajan\* and Shahid Ali Khan

- <sup>a</sup> State Key Laboratory of Chemistry and Utilization of Carbon-Based Energy Resources, College of Chemistry, Xinjiang University, Urumqi, 830017, People's Republic of China
- <sup>b</sup> Department of Chemistry, School of Natural Sciences, National University of Science and Technology (NUST), Islamabad 44000, Pakistan

E-mail: [ablajan209@hotmail.com](mailto:ablajan209@hotmail.com), [ablajan209@xju.edu.cn](mailto:ablajan209@xju.edu.cn)

#### Table of Contents

|                                                                                                         |     |
|---------------------------------------------------------------------------------------------------------|-----|
| 1. General information.....                                                                             | S3  |
| 2. Experimental procedures. ....                                                                        | S3  |
| 2.1 General procedure for the synthesis of (1H-benzo[d]imidazol-2-yl)methanethiols( <b>1a-1d</b> )      | S3  |
| 2.2 General procedure for the synthesis of (1H-benzo[d]imidazol-2-yl)methanol ( <b>4a-4d</b> ). ....    | S4  |
| 2.3 General procedure for the synthesis of $\alpha$ - (trifluoromethyl) styrene ( <b>2a-2s</b> ): ..... | S4  |
| 3. Experimental procedures for the synthesis of final compounds: .....                                  | S5  |
| 3.1 Synthesis of compounds <b>3a-3s</b> :.....                                                          | S5  |
| 3.2 Synthesis of compounds <b>5a-5o</b> : .....                                                         | S6  |
| 3.3 Synthesis of compounds <b>7a-7k</b> : .....                                                         | S7  |
| 5. Transformation of <b>5h</b> .....                                                                    | S9  |
| 5.1 General procedure for the synthesis of compound <b>5h</b> .....                                     | S9  |
| 6. Mechanistic Studies.....                                                                             | S9  |
| 6.1 Control experiments .....                                                                           | S9  |
| 7. X-ray crystallographic data of compounds <b>3k</b> , <b>5o</b> and <b>7g</b> .....                   | S10 |
| 7.1 The preparation of a crystal of compound <b>3k</b> (CCDC 2451045).....                              | S10 |
| 7.2 The preparation of a crystal of compound <b>5o</b> (CCDC 2451045). ....                             | S11 |

|                                                                                                   |     |
|---------------------------------------------------------------------------------------------------|-----|
| 7.3 The preparation of a crystal of compound <b>7g</b> (CCDC 2470561). .....                      | S13 |
| 8. Analytical and characterization data.....                                                      | S14 |
| 9. References: .....                                                                              | S30 |
| 10. <sup>1</sup> H NMR, <sup>13</sup> C NMR and <sup>19</sup> F NMR spectra of all products ..... | S32 |

## 1. General information

All reagents and solvents were used as received from Adamas without additional purification. Workup procedures were performed in the air. Thin-layer chromatography (TLC) utilized glass plates with 0.25 mm silica gel. Products were separated by column chromatography using silica gel with a mesh size of 200-400.  $^1\text{H}$  NMR spectra and  $^{13}\text{C}$  NMR spectra were recorded with a Bruker spectrometer (600 MHz).  $^1\text{H}$  NMR spectra were referenced to residual TMS (0 ppm) and reported as follows: chemical shift, multiplicity (s = singlet, d = doublet, t = triplet, q = quartet, dd = doublet of doublets, ddd = doublet of doublet of doublets, dt = doublets of triplets, td = triplet of doublets, qd = quartet of doublets, brs = broad singlet, m = multiplet). Chemical shifts of the  $^{13}\text{C}$  NMR spectra were measured relative to  $\text{CDCl}_3$  at 77.16 ppm. HRMS analysis was performed on a UPLC G2-XS mass spectrometer, with all signals reported as the  $m/z$  ratio. Melting points were measured using a Büchi M-560 at a heating rate of  $20^\circ\text{C}$  and are uncorrected.

All commercially available reagents were purchased and used without additional purification. Analytical thin-layer chromatography was performed on 0.20 mm silica gel plates (GF254) using UV light as a visualization method. Flash column chromatography was carried out using silica gel (200–300 mesh) with the specified solvent system. All reactions were conducted in oven-dried Schlenk tubes.

## 2. Experimental procedures.

### 2.1 General procedure for the Synthesis of (1H-benzo[d]imidazol-2-yl)methanethiol (**1a-1d**)

In a round-bottom flask, the aromatic diamine (5.0 mmol, 540 mg, 1.0 equiv) and thioglycolic acid (20.0 mmol, 1.84 g, 2.8 mL, 4.0 equiv) were refluxed in an aqueous 4N HCl solution (10 mL) for 3-4 hours. Upon cooling the reaction mixture to room temperature, saturated NaOH solution was added dropwise to achieve a pH of approximately 7-8. The product precipitated as an off-white solid, which was filtered, washed with ice-cold water, and dried under vacuum to obtain the derivatives of pure (1H-benzo[d]imidazol-2-yl)methanethiol **1a-1d**.<sup>1</sup>

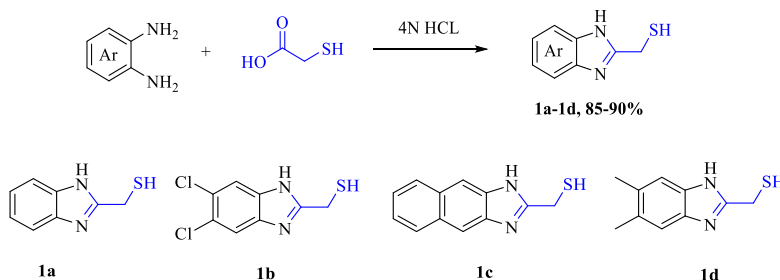

## 2.2 General procedure for the Synthesis of (1H-benzo[d]imidazol-2-yl)methanol (**4a-4d**).

For the synthesis of substrates **4a-4d**,<sup>2</sup> different substituted aromatic diamines (5.0 mmol, 540 mg, 1.0 equiv) were added to glyoxylic acid (20.0 mmol, 1.52 g, 4.0 equiv) in an aqueous 4N HCl solution (10 mL). Then, the mixture was refluxed in a round-bottom flask for 4 hours, and product formation was monitored with TLC. The reaction mixture was cooled to 0 °C. Saturated NaOH solution was added dropwise to neutralize the mixture. The product precipitated as a white solid. The precipitate was filtered, washed with ice-cold water, and dried under vacuum to obtain the pure products.

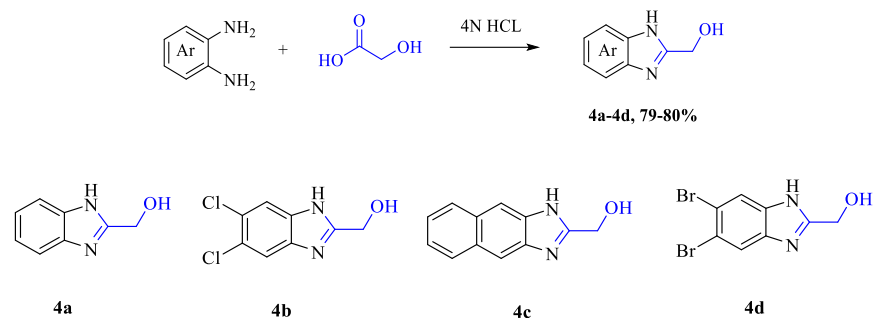

## 2.3 General procedure for the synthesis of $\alpha$ - (trifluoromethyl) styrene (**2a-2s**):

In a 50 mL dried round-bottom flask equipped with a magnetic stir bar and septum, arylboronic acid (1 equiv.) and  $\text{Pd}(\text{PPh}_3)_2\text{Cl}_2$  (3 mol%) were added, after which the flask was evacuated and filled with nitrogen gas. Then, THF (0.3 M) and an aqueous  $\text{K}_2\text{CO}_3$  solution (2.0 M, 4.0 equiv.) were added, followed by 2-bromo-3,3,3-trifluoroprop-1-ene (1.5 equiv.). The reaction mixture was heated to 60°C under stirring in an oil bath for 12 hours. The progress of the reaction was monitored by TLC. Upon completion, the mixture was cooled to room temperature and extracted three times with ethyl acetate (15.0 mL each). The organic layer was washed with brine (20.0 mL), dried over anhydrous  $\text{Na}_2\text{SO}_4$ , filtered, and concentrated under reduced pressure. Silica gel column chromatography (petroleum ether/ethyl acetate = 200/1) was performed to obtain the desired product ( $\alpha$ - (trifluoromethyl) styrene), compounds **2a-2s**.<sup>3-4</sup>

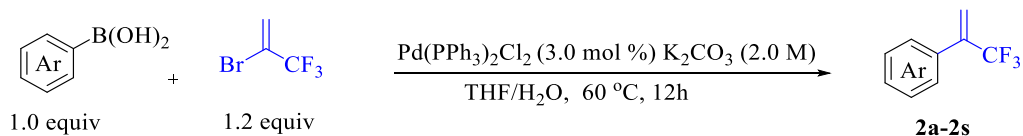

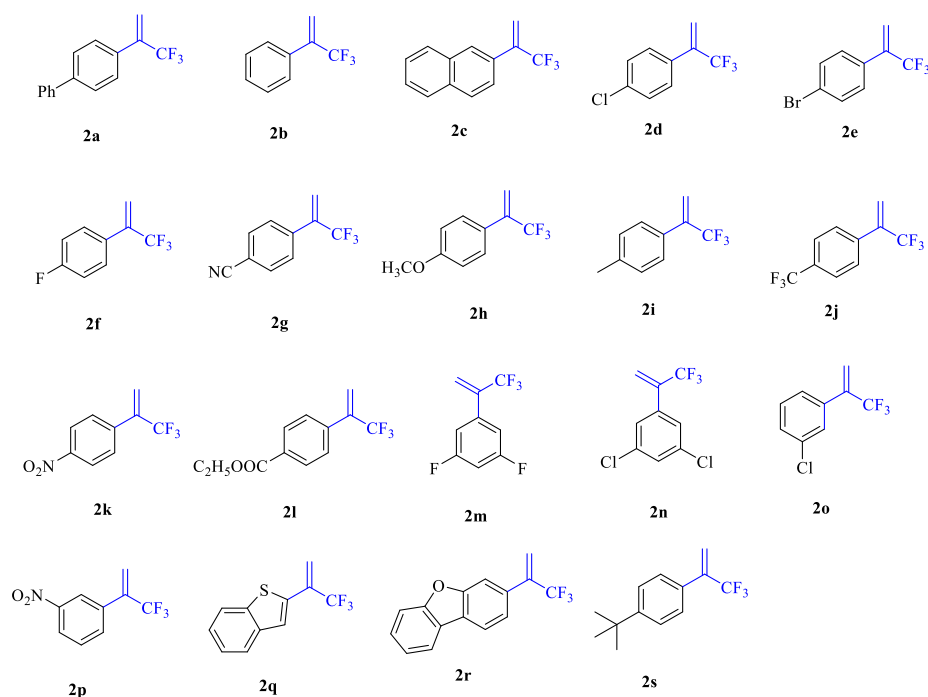

### 3. Experimental procedures for the synthesis of final compounds:

#### 3.1 Synthesis of compounds **3a-3s**:

To a 10 mL oven-dried glass vial equipped with a stir bar, (1H-benzo[d]imidazol-2-yl)methanethiol **1a-1d** (0.2 mmol),  $\alpha$ -(trifluoromethyl) styrene **2** (0.2 mmol),  $K_2CO_3$  (3.5 equivalents), and DMSO (1 mL) were vigorously stirred at 65°C for 12 hours. After the reaction was completed and monitored by TLC, water was added, resulting in the precipitation of the product, which was then extracted with EtOAc (three times, 10 mL each). The combined organic layers were dried over anhydrous  $MgSO_4$ , filtered, and the solvents were evaporated under reduced pressure. Finally, the compounds were purified by flash chromatography (eluting with petroleum ether/ethyl acetate) to afford the corresponding products **3a-3s**.

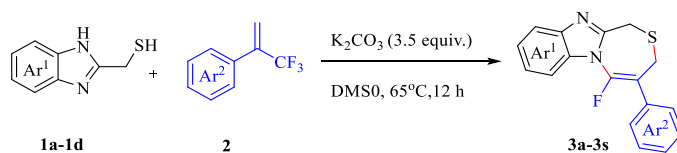

**Table 1** Optimization of reaction conditions

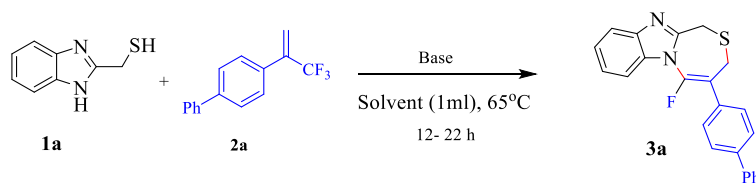

| entry           | base (3.5 equiv.)                           | solvent                          | temp. (°C) | time (h)  | <sup>b</sup> yield (%) |
|-----------------|---------------------------------------------|----------------------------------|------------|-----------|------------------------|
| 1               | Na <sub>2</sub> CO <sub>3</sub>             | DMF                              | r.t        | 12        | trace                  |
| 2               | Cs <sub>2</sub> CO <sub>3</sub>             | DMF                              | r.t        | 12        | 0                      |
| 3               | K <sub>3</sub> PO <sub>4</sub>              | DMF                              | r.t        | 12        | 0                      |
| 4               | K <sub>2</sub> CO <sub>3</sub>              | DMF                              | r.t        | 12        | 22                     |
| 5               | K <sub>2</sub> CO <sub>3</sub>              | DMSO                             | r.t        | 12        | 42                     |
| 6 <sup>c</sup>  | K <sub>2</sub> CO <sub>3</sub>              | DMSO                             | 45         | 12        | 45                     |
| 7 <sup>d</sup>  | K <sub>2</sub> CO <sub>3</sub>              | DMSO                             | 50         | 12        | 54                     |
| <b>8</b>        | <b>K<sub>2</sub>CO<sub>3</sub></b>          | <b>DMSO</b>                      | <b>65</b>  | <b>12</b> | <b>77</b>              |
| 9 <sup>e</sup>  | K <sub>2</sub> CO <sub>3</sub>              | DMSO                             | 80         | 12        | 77                     |
| 10 <sup>f</sup> | K <sub>2</sub> CO <sub>3</sub> (2 equiv.)   | DMSO                             | 65         | 12        | 59                     |
| 11 <sup>g</sup> | K <sub>2</sub> CO <sub>3</sub> (2.5 equiv.) | DMSO                             | 65         | 12        | 62                     |
| 12 <sup>h</sup> | K <sub>2</sub> CO <sub>3</sub> (3 equiv.)   | DMSO                             | 65         | 12        | 64                     |
| 13              | DABCO                                       | DMSO                             | 65         | 12        | trace                  |
| 14              | Et <sub>3</sub> N                           | DMSO                             | 65         | 12        | trace                  |
| 15              | DBU                                         | DMSO                             | 65         | 12        | trace                  |
| 16              | K <sub>2</sub> CO <sub>3</sub>              | C <sub>2</sub> H <sub>5</sub> OH | 65         | 12        | 0                      |
| 17              | K <sub>2</sub> CO <sub>3</sub>              | CH <sub>3</sub> CN               | 65         | 12        | trace                  |
| 18              | K <sub>2</sub> CO <sub>3</sub>              | 1,4 dioxane                      | 65         | 12        | 0                      |
| 19              | K <sub>2</sub> CO <sub>3</sub>              | THF                              | 65         | 12        | trace                  |
| 20              | ----                                        | DMSO                             | 65         | 12        | 0                      |

<sup>a</sup> General Reaction conditions: **1a** (0.2 mmol), **2a** (0.2 mmol), base (0.7mmol), solvent (1 mL), 65 °C, 12 h. <sup>b</sup> Isolated yield. <sup>c</sup>Temperature at 45 °C. <sup>d</sup>Temperature at 50 °C. <sup>e</sup>Temperature at 80°C. <sup>f</sup>with (2 equiv) of K<sub>2</sub>CO<sub>3</sub>, <sup>g</sup>with (2.5 equiv) of K<sub>2</sub>CO<sub>3</sub>, <sup>h</sup> with (3 equiv) of K<sub>2</sub>CO<sub>3</sub>.

### 3.2 Synthesis of compounds **5a-5o**:

To a 10 mL oven-dried glass vial equipped with a stir bar, (1H-benzo[d]imidazol-2-yl)methanol **4a-4d** (0.2 mmol), α- (trifluoromethyl) styrene **2** (0.2 mmol), Cs<sub>2</sub>CO<sub>3</sub> (3.5 equiv), and DMSO (1 mL) were vigorously stirred at 60°C for 12 hours. After the reaction was complete, as monitored by TLC, water was added to cause the product to precipitate, and it was then extracted with EtOAc (3×10 mL). The combined organic phases were dried over anhydrous MgSO<sub>4</sub>, filtered, and all volatiles were evaporated under reduced pressure. Finally, the compounds were purified by flash chromatography (eluting with petroleum ether/ethyl acetate), yielding the corresponding products **5a-5o**.

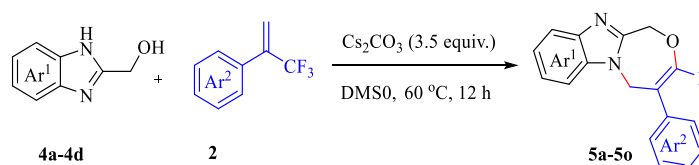

**Table 2.** Optimization of reaction conditions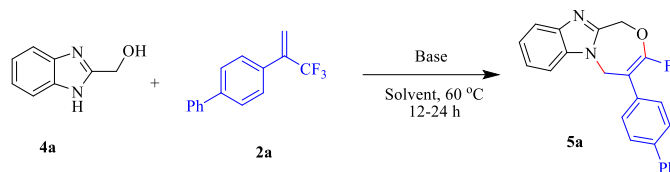

| entry           | base (3.5 equiv.)                            | solvent     | temp (°C) | time (h)  | yield (%) |
|-----------------|----------------------------------------------|-------------|-----------|-----------|-----------|
| 1               | NaOH                                         | DMF         | r.t       | 12        | trace     |
| 2               | Na <sub>2</sub> CO <sub>3</sub>              | DMF         | r.t       | 12        | trace     |
| 3               | Na <sub>2</sub> CO <sub>3</sub>              | DMSO        | r.t       | 12        | trace     |
| 4               | K <sub>2</sub> CO <sub>3</sub>               | DMF         | r.t       | 12        | trace     |
| 5               | K <sub>2</sub> CO <sub>3</sub>               | DMSO        | r.t       | 12        | trace     |
| 6               | Cs <sub>2</sub> CO <sub>3</sub>              | DMF         | r.t       | 12        | 41        |
| 7               | Cs <sub>2</sub> CO <sub>3</sub>              | DMSO        | r.t       | 12        | 44        |
| 8 <sup>c</sup>  | Cs <sub>2</sub> CO <sub>3</sub>              | DMSO        | 45        | 12        | 49        |
| <b>9</b>        | <b>Cs<sub>2</sub>CO<sub>3</sub></b>          | <b>DMSO</b> | <b>60</b> | <b>12</b> | <b>88</b> |
| 10 <sup>d</sup> | Cs <sub>2</sub> CO <sub>3</sub> (2 equiv.)   | DMSO        | 60        | 12        | 52        |
| 11 <sup>e</sup> | Cs <sub>2</sub> CO <sub>3</sub> (2.5 equiv.) | DMSO        | 60        | 12        | 60        |
| 12 <sup>f</sup> | Cs <sub>2</sub> CO <sub>3</sub> (3 equiv.)   | DMSO        | 60        | 12        | 73        |
| 13              | DBU                                          | DMSO        | 60        | 12        | trace     |
| 14              | DABCO                                        | DMSO        | 60        | 12        | 0         |
| 15              | Et <sub>3</sub> N                            | DMSO        | 60        | 12        | 0         |
| 16              | Cs <sub>2</sub> CO <sub>3</sub>              | EtOH        | 60        | 12        | 0         |
| 17              | Cs <sub>2</sub> CO <sub>3</sub>              | MeOH        | 60        | 12        | 0         |
| 18              | Cs <sub>2</sub> CO <sub>3</sub>              | Acetone     | 60        | 12        | 0         |
| 19              | Cs <sub>2</sub> CO <sub>3</sub>              | THF         | 60        | 12        | 0         |
| 20              | ----                                         | DMSO        | 60        | 12        | 0         |

<sup>a</sup>General Reaction conditions: **4a** (0.2 mmol), **2a** (0.2 mmol), base (0.7mmol), solvent (1 mL), 60 °C, 12 h. <sup>b</sup> Isolated yield. <sup>c</sup>temperature at 45 °C. <sup>d</sup>with (2 equiv.) of Cs<sub>2</sub>CO<sub>3</sub>. <sup>e</sup>with (2.5 equiv) of Cs<sub>2</sub>CO<sub>3</sub>. <sup>f</sup>with (3 equiv.) of Cs<sub>2</sub>CO<sub>3</sub>.

### 3.3 Synthesis of compounds **7a-7k**:

To a 10 mL oven-dried glass vial equipped with a stir bar, (1H-indol-2-yl)methanol **6** (0.2 mmol), α-(trifluoromethyl)styrene **2** (0.2 mmol), t-BuOK (3.5 equivalents), and CH<sub>3</sub>CN (1 mL) were vigorously stirred at 80 °C for 12 hours. After monitoring the reaction by TLC and completion, water

was added, resulting in the precipitation of the product. The precipitate was then extracted with EtOAc (3 × 10 mL). The combined organic layers were dried over anhydrous MgSO<sub>4</sub>, filtered, and all volatiles were evaporated under reduced pressure. Finally, the compounds were purified by flash chromatography (eluting with petroleum ether/ethyl acetate), yielding the corresponding products **7a-7k**.

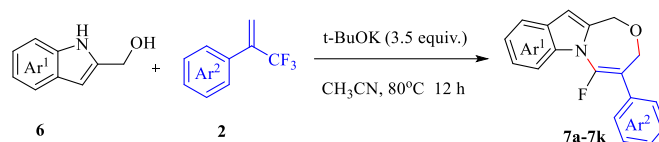

**Table 3.** Optimization of reaction conditions

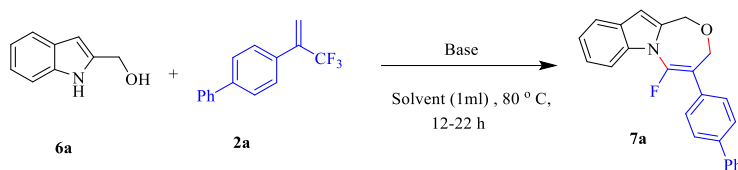

| entry           | base (3.5 equiv.)               | solvent            | temp (°C) | time (h) | <sup>b</sup> yield (%) |
|-----------------|---------------------------------|--------------------|-----------|----------|------------------------|
| 1               | Cs <sub>2</sub> CO <sub>3</sub> | DMF                | r.t       | 12       | trace                  |
| 2               | Cs <sub>2</sub> CO <sub>3</sub> | DMSO               | r.t       | 12       | trace                  |
| 3               | K <sub>2</sub> CO <sub>3</sub>  | DMF                | r.t       | 12       | trace                  |
| 4               | K <sub>2</sub> CO <sub>3</sub>  | DMSO               | r.t       | 12       | trace                  |
| 5               | K <sub>2</sub> CO <sub>3</sub>  | CH <sub>3</sub> CN | r.t       | 12       | 0                      |
| 6               | <i>t</i> -BuONa                 | CH <sub>3</sub> CN | r.t       | 12       | 26                     |
| 7               | <i>t</i> -BuOK                  | CH <sub>3</sub> CN | r.t       | 12       | 31                     |
| 8 <sup>c</sup>  | <i>t</i> -BuOK                  | CH <sub>3</sub> CN | 40        | 12       | 37                     |
| 9 <sup>d</sup>  | <i>t</i> -BuOK                  | CH <sub>3</sub> CN | 55        | 12       | 39                     |
| 10 <sup>e</sup> | <i>t</i> -BuOK                  | CH <sub>3</sub> CN | 65        | 12       | 42                     |
| 11              | <i>t</i> -BuOK                  | CH <sub>3</sub> CN | 80        | 12       | 78                     |
| 12 <sup>f</sup> | <i>t</i> -BuOK (2 equiv.)       | CH <sub>3</sub> CN | 80        | 12       | 49                     |
| 13 <sup>g</sup> | <i>t</i> -BuOK (2.5 equiv.)     | CH <sub>3</sub> CN | 80        | 12       | 55                     |
| 14 <sup>h</sup> | <i>t</i> -BuOK (3 equiv.)       | CH <sub>3</sub> CN | 80        | 12       | 63                     |
| 15              | DBU                             | CH <sub>3</sub> CN | 80        | 12       | trace                  |
| 16              | DABCO                           | CH <sub>3</sub> CN | 80        | 12       | 0                      |
| 17              | Et <sub>3</sub> N               | CH <sub>3</sub> CN | 80        | 12       | 0                      |
| 18              | <i>t</i> -BuOK                  | EtOH               | 80        | 12       | 0                      |
| 19              | <i>t</i> -BuOK                  | MeOH               | 80        | 12       | 0                      |
| 18              | <i>t</i> -BuOK                  | toluene            | 60        | 12       | 0                      |



|    |                |                    |    |    |   |
|----|----------------|--------------------|----|----|---|
| 19 | <i>t</i> -BuOK | THF                | 60 | 12 | 0 |
| 20 | ----           | CH <sub>3</sub> CN | 60 | 12 | 0 |

4. <sup>a</sup> General Reaction conditions: **6a** (0.2 mmol), **2a** (0.2 mmol), base (0.7mmol), solvent (1 mL), 80 °C, 12 h. <sup>b</sup> Isolated yield. <sup>c</sup>Temperature at 40 °C. <sup>d</sup>Temperature at 55 °C. <sup>e</sup>Temperature at 65 °C. <sup>f</sup>with (2 equiv) of K<sub>2</sub>CO<sub>3</sub>, <sup>g</sup> with (2.5equiv) of K<sub>2</sub>CO<sub>3</sub>. <sup>h</sup>with (3 equiv ) of K<sub>2</sub>CO<sub>3</sub>.

## 5. Transformation of **5h**

### 5.1 General procedure for the synthesis of compound **5h**

A 25 mL oven-dried Schlenk tube equipped with a magnetic stirring bar, **5h** (0.2 mmol), indole (0.4 mmol), *t*-BuONa (0.6 mmol), and DMF (1 mL) was vigorously stirred at 90 °C for 16 hours. Then, the mixture was stopped, water (15 mL) was added, and it was extracted with EtOAc (15 mL × 3). The combined organic layers were dried over anhydrous MgSO<sub>4</sub>, filtered, and concentrated under vacuum. Further purification by flash column chromatography on silica gel (eluting with petroleum ether/ethyl acetate) yielded the defluorination product **8** with an isolated yield of 82%.

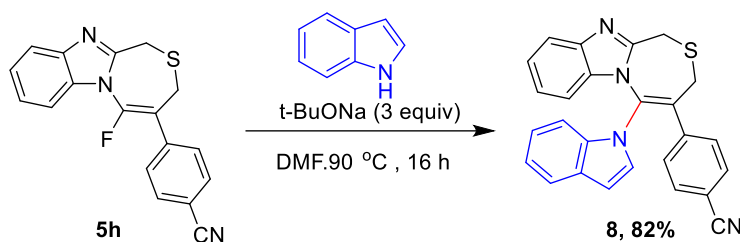

## 6. Mechanistic Studies

### 6.1 Control experiments

We carried out two control experiments to gain further insights into the mechanism. **a)** To a 10 mL oven-dried glass vial equipped with a stir bar, *N*-Protected (1-methyl-1H-benzo[d]imidazol-2-yl)methanol (0.2 mmol) **9**,  $\alpha$ - (trifluoromethyl) styrene **2a** (0.2 mmol), Cs<sub>2</sub>CO<sub>3</sub> (3.5 equivalents), and DMSO (1 mL) were vigorously stirred at 60 °C for 12 hours. After the reaction was complete, monitored by TLC, water was added to precipitate the product, which was then extracted with EtOAc (3×10 mL). The combined organic phase was dried over anhydrous MgSO<sub>4</sub>, filtered, and all volatiles were evaporated under reduced pressure. Finally, the *gem*-difluoroalkylated product **10** was obtained and purified by flash chromatography (eluting with petroleum ether/ethyl acetate).

**b)** The second control experiment was also conducted under the same standard reaction conditions, where *O*-protected 2-(methoxymethyl)-1H-benzo[d]imidazole (0.2 mmol) **11**,  $\alpha$ -(trifluoromethyl) styrene **2d** (0.2 mmol), Cs<sub>2</sub>CO<sub>3</sub> (3.5 equivalents), and DMSO (1 mL) were vigorously stirred at 60 °C for 12 hours. After the reaction was monitored by TLC and shown to be complete, water was added,

precipitating the product, which was then extracted with EtOAc (3×10 mL). The combined organic layers were dried over anhydrous MgSO<sub>4</sub>, filtered, and all volatiles were evaporated under reduced pressure. Finally, flash chromatography (eluting with petroleum ether/ethyl acetate) was used to obtain the desired compound **12** in 89% yield. The <sup>1</sup>H NMR, <sup>13</sup>C NMR, and <sup>19</sup>F NMR spectra of the new compound indicate that the reaction mechanism involves a unique sequential *ipso*-/ $\gamma$ -selective defluorinative cyclization.

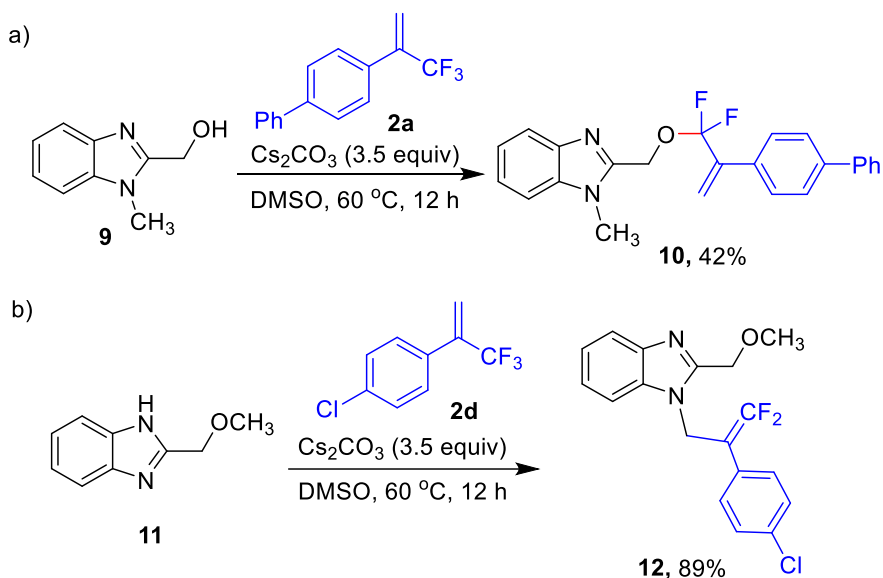

## 7. X-ray Crystallographic Data of compounds **3k**, **5o** and **7g**.

### 7.1 The preparation of a crystal of compound **3k** (CCDC 2451045).

The obtained compound **3k** (55 mg, 79% yield) was dissolved in an appropriate amount of dichloromethane (CH<sub>2</sub>Cl<sub>2</sub>) in a 5 mL glass vial to form a saturated solution at room temperature. Then the petroleum ether (10 mL) was added to form the two-phase mixture. Slow evaporation of a two-phase mixture led to odorless, colorless crystals. Thermal ellipsoids of the crystal structure of compound **3k** were set at 50% occupancy, and the crystal data have been deposited in the CCDC under the number **2451045**.

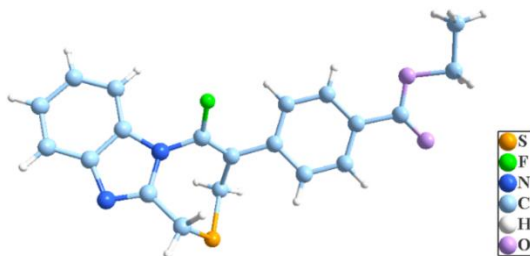

|                                                |                                                                  |
|------------------------------------------------|------------------------------------------------------------------|
| Identification code                            | CCDC 2451045                                                     |
| Empirical formula                              | C <sub>20</sub> H <sub>17</sub> FN <sub>2</sub> O <sub>2</sub> S |
| Formula weight                                 | 368.41                                                           |
| Temperature/K                                  | 296.15                                                           |
| Crystal system                                 | orthorhombic                                                     |
| Space group                                    | Pna2 <sub>1</sub>                                                |
| a/Å                                            | 14.458(3)                                                        |
| b/Å                                            | 7.3920(19)                                                       |
| c/Å                                            | 33.338(10)                                                       |
| $\alpha/^\circ$                                | 90                                                               |
| $\beta/^\circ$                                 | 90                                                               |
| $\gamma/^\circ$                                | 90                                                               |
| Volume/Å <sup>3</sup>                          | 3563.0(16)                                                       |
| Z                                              | 8                                                                |
| $\rho_{\text{calc}}/\text{g}/\text{cm}^3$      | 1.374                                                            |
| $\mu/\text{mm}^{-1}$                           | 0.208                                                            |
| F(000)                                         | 1536.0                                                           |
| Crystal size/mm <sup>3</sup>                   | 0.12 × 0.1 × 0.08                                                |
| Radiation                                      | MoK $\alpha$ ( $\lambda$ = 0.71073)                              |
| 2 $\Theta$ range for data collection/ $^\circ$ | 5.636 to 50.104                                                  |
| Index ranges                                   | -17 ≤ h ≤ 17, -8 ≤ k ≤ 8, -39 ≤ l ≤ 38                           |
| Reflections collected                          | 45643                                                            |
| Independent reflections                        | 6259 [R <sub>int</sub> = 0.0788, R <sub>sigma</sub> = 0.0592]    |
| Data/restraints/parameters                     | 6259/119/511                                                     |
| Goodness-of-fit on F <sup>2</sup>              | 1.041                                                            |
| Final R indexes [I ≥ 2 $\sigma$ (I)]           | R <sub>1</sub> = 0.0467, wR <sub>2</sub> = 0.1026                |
| Final R indexes [all data]                     | R <sub>1</sub> = 0.0990, wR <sub>2</sub> = 0.1275                |
| Largest diff. peak/hole / e Å <sup>-3</sup>    | 0.20/-0.23                                                       |
| Flack parameter                                | 0.35(4)                                                          |

## 7.2 The preparation of a crystal of compound **5o** (CCDC 2451045).

The obtained compound **5o** (47 mg, 76% yield) was dissolved in an appropriate amount of methanol (CH<sub>3</sub>OH) in a 5 ml glass vial to form a saturated solution at room temperature. Then ethyl acetate (5ml) and petroleum ether (5ml) were added to form the three-phase mixture. The vial was then sealed with parafilm. Slow evaporation of the three-phase mixture resulted in odorless light green crystals. Thermal ellipsoids of the crystal structure of **5o** were set at 50% and the crystal data have been deposited to CCDC number **2451045**.

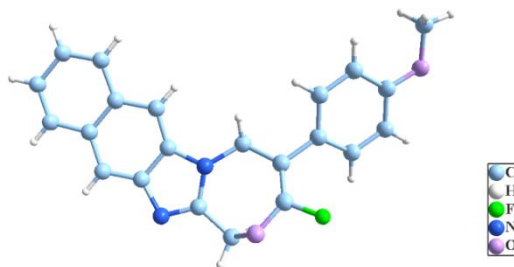

|                                  |                                                                |
|----------------------------------|----------------------------------------------------------------|
| Identification code              | 2470562                                                        |
| Empirical formula                | C <sub>22</sub> H <sub>17</sub> FN <sub>2</sub> O <sub>2</sub> |
| Formula weight                   | 360.37                                                         |
| Temperature/K                    | 273.15                                                         |
| Crystal system                   | monoclinic                                                     |
| Space group                      | C2/c                                                           |
| a/Å                              | 14.974                                                         |
| b/Å                              | 7.741                                                          |
| c/Å                              | 29.954                                                         |
| $\alpha$ /°                      | 90                                                             |
| $\beta$ /°                       | 91.40                                                          |
| $\gamma$ /°                      | 90                                                             |
| Volume/Å <sup>3</sup>            | 3471.1                                                         |
| Z                                | 8                                                              |
| $\rho_{\text{calc}}/\text{cm}^3$ | 1.379                                                          |
| $\mu/\text{mm}^{-1}$             | 0.793                                                          |
| F(000)                           | 1504.0                                                         |
| Crystal size/mm <sup>3</sup>     | 0.12 × 0.1 × 0.08                                              |

|                                                  |                                                                |
|--------------------------------------------------|----------------------------------------------------------------|
| Radiation                                        | CuK $\alpha$ ( $\lambda$ = 1.54178)                            |
| 2 $\Theta$ range for data collection/ $^{\circ}$ | 5.902 to 134.41                                                |
| Index ranges                                     | $-17 \leq h \leq 17$ , $-9 \leq k \leq 9$ , $0 \leq l \leq 35$ |
| Reflections collected                            | 5853                                                           |
| Independent reflections                          | 3085 [ $R_{\text{int}}$ = 0.1120, $R_{\text{sigma}}$ = 0.0924] |
| Data/restraints/parameters                       | 3085/0/245                                                     |
| Goodness-of-fit on $F^2$                         | 0.936                                                          |
| Final R indexes [ $I \geq 2\sigma(I)$ ]          | $R_1$ = 0.0724, $wR_2$ = 0.1988                                |
| Final R indexes [all data]                       | $R_1$ = 0.1104, $wR_2$ = 0.2317                                |
| Largest diff. peak/hole / e $\text{\AA}^{-3}$    | 0.18/-0.26                                                     |

### 7.3 The preparation of a crystal of compound **7g** (CCDC 2470561).

The obtained compound **7g** (55 mg, 91% yield) was dissolved in an appropriate amount of dichloromethane ( $\text{CH}_2\text{Cl}_2$ ) in a 5 ml glass vial to form a saturated solution at room temperature. Then the petroleum ether (10 ml) was added to form the two-phase mixture. Slow evaporation of the two-phase mixture yielded odorless red crystals weighing **7g**. Thermal ellipsoids of the crystal structure were set at 50%, and the crystal data have been deposited in the CCDC under the number 2470561.

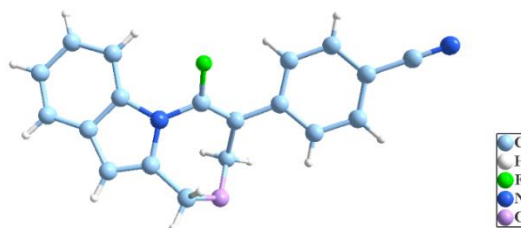

|                     |                                                 |
|---------------------|-------------------------------------------------|
| Identification code | 2470561                                         |
| Empirical formula   | $\text{C}_{19}\text{H}_{13}\text{FN}_2\text{O}$ |
| Formula weight      | 304.31                                          |
| Temperature/K       | 273.15                                          |
| Crystal system      | monoclinic                                      |
| Space group         | $P2_1/c$                                        |
| a/ $\text{\AA}$     | 11.149                                          |
| b/ $\text{\AA}$     | 12.237                                          |
| c/ $\text{\AA}$     | 11.005                                          |

|                                                |                                                             |
|------------------------------------------------|-------------------------------------------------------------|
| $\alpha/^\circ$                                | 90                                                          |
| $\beta/^\circ$                                 | 97.90                                                       |
| $\gamma/^\circ$                                | 90                                                          |
| Volume/ $\text{\AA}^3$                         | 1487.1                                                      |
| Z                                              | 4                                                           |
| $\rho_{\text{calc}}/\text{g cm}^{-3}$          | 1.359                                                       |
| $\mu/\text{mm}^{-1}$                           | 0.771                                                       |
| F(000)                                         | 632.0                                                       |
| Crystal size/ $\text{mm}^3$                    | $0.22 \times 0.2 \times 0.18$                               |
| Radiation                                      | CuK $\alpha$ ( $\lambda = 1.54178$ )                        |
| 2 $\Theta$ range for data collection/ $^\circ$ | 8.006 to 133.348                                            |
| Reflections collected                          | 2595                                                        |
| Independent reflections                        | 2595 [ $R_{\text{int}} = 0$ , $R_{\text{sigma}} = 0.0394$ ] |
| Data/restraints/parameters                     | 2595/0/208                                                  |
| Goodness-of-fit on $F^2$                       | 1.076                                                       |
| Final R indexes [ $I \geq 2\sigma(I)$ ]        | $R_1 = 0.0593$ , $wR_2 = 0.1615$                            |
| Final R indexes [all data]                     | $R_1 = 0.0726$ , $wR_2 = 0.1693$                            |
| Largest diff. peak/hole / $e \text{\AA}^{-3}$  | 0.16/-0.26                                                  |

## 8. Analytical and characterization data

### 4-([1,1'-biphenyl]-4-yl)-5-fluoro-1H,3H-benzo[4,5]imidazo[2,1-c][1,4]thiazepine (**3a**)

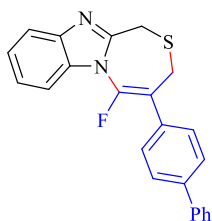

Compound **3a** was isolated as a white solid after flash chromatography (petroleum ether/EtOAc = 10:4), 57 mg, 77 % yield, m.p.: 198–202 °C,  $R_f$  = 0.42.  $^1\text{H}$  NMR (600 MHz,  $\text{CDCl}_3$ )  $\delta$  7.84–7.81 (m, 1H), 7.80–7.78 (m, 2H), 7.73–7.70 (m, 2H), 7.67–7.64 (m, 2H), 7.58–7.55 (m, 1H), 7.48 (t,  $J = 7.7$  Hz, 2H), 7.42–7.37 (m, 4H), 4.17 (s, 2H), 3.47 (d,  $J = 1.5$  Hz, 2H).  $^{13}\text{C}$  NMR (151 MHz,  $\text{CDCl}_3$ )  $\delta$  147.2 (d,  $J = 264.6$  Hz), 135.1, 134.9 (d,  $J = 4.3$  Hz), 132.9, 131.3, 130.4, 127.7, 127.6, 127.6, 126.7 (d,  $J = 2.3$  Hz), 125.6, 125.1, 124.4, 124.2, 122.8, 121.2, 120.3, 111.7 (d,  $J = 7.6$  Hz), 104.2 (d,  $J = 2.0$  Hz), 102.4 (d,  $J = 18.5$  Hz), 67.4 (d,  $J = 4.4$  Hz), 61.1.  $^{19}\text{F}$  NMR (565 MHz,  $\text{CDCl}_3$ )  $\delta$  -97.34. HRMS (ESI-TOF)  $m/z$  [ $\text{M}+\text{H}$ ] $^+$  calcd for  $\text{C}_{23}\text{H}_{18}\text{FN}_2\text{S}$  373.1175, found 373.1181.

5-fluoro-4-(p-tolyl)-1*H*,3*H*-benzo[4,5]imidazo[2,1-*c*][1,4]thiazepine (**3b**)

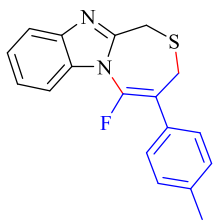

Compound (**3b**) was isolated as light-yellow crystals after flash chromatography (petroleum ether/EtOAc = 10:4), 20 mg, 32% yield, m.p.: 156–158 °C,  $R_f$  = 0.45.  $^1\text{H}$  NMR (600 MHz,  $\text{CDCl}_3$ )  $\delta$  7.82–7.80 (m, 1H), 7.61–7.58 (m, 2H), 7.54 (d,  $J$  = 7.3 Hz, 1H), 7.39–7.35 (m, 2H), 7.30–7.28 (m, 2H), 4.15 (s, 2H), 3.42 (d,  $J$  = 1.6 Hz, 2H), 2.42 (s, 3H).  $^{13}\text{C}$  NMR (151 MHz,  $\text{CDCl}_3$ )  $\delta$  150.9, 143.7, 141.9, 138.7, 133.3, 130.4 (d,  $J$  = 4.9 Hz), 129.5, 127.9 (d,  $J$  = 4.7 Hz), 124.4, 124.2, 120.3, 111.2 (d,  $J$  = 2.2 Hz), 30.8 (d,  $J$  = 2.4 Hz), 25.2, 21.3.  $^{19}\text{F}$  NMR (565 MHz,  $\text{CDCl}_3$ )  $\delta$  -98.90. HRMS (ESI-TOF)  $m/z$   $[\text{M}+\text{H}]^+$  calcd for  $\text{C}_{18}\text{H}_{16}\text{FN}_2\text{S}$  311.1018, found 311.1014.

4-(4-(*tert*-butyl)phenyl)-5-fluoro-1*H*,3*H*-benzo[4,5]imidazo[2,1-*c*][1,4]thiazepine (**3c**)

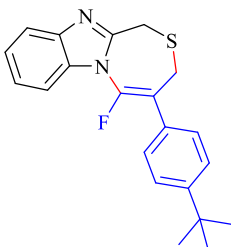

Compound (**3c**) was isolated as a light orange solid after flash chromatography (petroleum ether/EtOAc = 10:3), 49 mg, 71% yield, m.p.: 146–148 °C,  $R_f$  = 0.45.  $^1\text{H}$  NMR (400 MHz,  $\text{CDCl}_3$ )  $\delta$  7.81 (s, 1H), 7.67–7.63 (m, 2H), 7.54 (m,  $J$  = 6.1, 2.1 Hz, 1H), 7.52–7.48 (m, 2H), 7.39–7.35 (m, 2H), 4.14 (s, 2H), 3.43 (d,  $J$  = 1.5 Hz, 2H), 1.37 (s, 9H).  $^{13}\text{C}$  NMR (151 MHz,  $\text{CDCl}_3$ )  $\delta$  151.9, 150.9 (d,  $J$  = 2.1 Hz), 143.9, 142.7, 142.1, 133.5 (d,  $J$  = 4.5 Hz), 130.5 (d,  $J$  = 5.0 Hz), 127.9 (d,  $J$  = 4.9 Hz), 125.9, 124.5, 124.2, 120.45, 111.3 (d,  $J$  = 2.4 Hz), 111.2, 111.1, 34.9, 31.4, 30.8 (d,  $J$  = 2.5 Hz), 25.3.  $^{19}\text{F}$  NMR (565 MHz,  $\text{CDCl}_3$ )  $\delta$  -94.10. HRMS (ESI-TOF)  $m/z$   $[\text{M}+\text{H}]^+$  calcd for  $\text{C}_{21}\text{H}_{22}\text{FN}_2\text{S}$  353.1488, found 353.1491.

5-fluoro-4-(4-methoxyphenyl)-1*H*,3*H*-benzo[4,5]imidazo[2,1-*c*][1,4]thiazepine (**3d**)

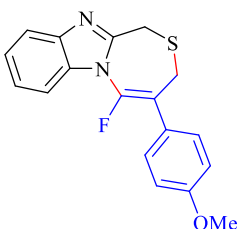

Compound (**3d**) was isolated as light colorless crystals after flash chromatography (petroleum ether/EtOAc = 10:3), 24 mg, 36% yield, m.p.: 98–100 °C,  $R_f$  = 0.41.  $^1\text{H}$  NMR (600 MHz,  $\text{CDCl}_3$ )  $\delta$  7.82–7.80 (m, 1H), 7.66–7.63 (m, 2H), 7.54 (dt,  $J$  = 7.5, 1.7 Hz, 1H), 7.40–7.35 (m, 3H), 7.02–6.99 (m, 2H), 4.15 (s, 2H), 3.87 (s, 3H), 3.41 (d,  $J$  = 1.4 Hz, 2H).  $^{13}\text{C}$  NMR (151 MHz,  $\text{CDCl}_3$ )  $\delta$  159.7, 150.8, 141.3, 129.4 (d,  $J$  = 5.0 Hz), 125.4 (d,  $J$  = 5.0 Hz), 124.4, 124.1, 120.2, 114.2, 111.1, 55.3, 30.7, 25.1.  $^{19}\text{F}$  NMR (565 MHz,  $\text{CDCl}_3$ )  $\delta$  -94.72. HRMS (ESI-TOF)  $m/z$   $[\text{M}+\text{H}]^+$  calcd for  $\text{C}_{18}\text{H}_{16}\text{FN}_2\text{OS}$  327.0967, found 327.0962.

5-fluoro-4-phenyl-1*H*,3*H*-benzo[4,5]imidazo[2,1-*c*][1,4]thiazepine (**3e**)

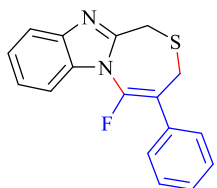

Compound (**3e**) was isolated as a colorless solid. after flash chromatography (petroleum ether/EtOAc = 10:3), 82 mg, 52% yield, m.p.: 149–150 °C,  $R_f$  = 0.46.  $^1\text{H}$  NMR (600 MHz,  $\text{CDCl}_3$ )  $\delta$  7.81 (d,  $J$  = 9.2 Hz, 1H), 7.71 (m,  $J$  = 8.2, 1.2 Hz, 2H), 7.55 (d,  $J$  = 7.3 Hz, 1H), 7.48 (dd,  $J$  = 8.4, 6.9 Hz, 2H), 7.42–7.37 (m, 3H), 4.16 (s, 2H), 3.44 (d,  $J$  = 1.5 Hz, 2H).  $^{13}\text{C}$  NMR (151 MHz,  $\text{CDCl}_3$ )  $\delta$  150.7, 143.9, 142.6, 142.2, 133.4 (d,  $J$  = 4.9 Hz), 133.2, 128.7, 128.5, 128.0 (d,  $J$  = 4.6 Hz), 124.3, 124.1, 120.3, 111.1, 111.1 (d,  $J$  = 2.4 Hz), 111.0, 30.8 (d,  $J$  = 2.2 Hz), 25.2.  $^{19}\text{F}$  NMR (565 MHz,  $\text{CDCl}_3$ )  $\delta$  -92.51. HRMS (ESI-TOF)  $m/z$   $[\text{M}+\text{H}]^+$  calcd for  $\text{C}_{17}\text{H}_{14}\text{FN}_2\text{S}$  297.0862, found 297.0853.

5-fluoro-4-(naphthalen-1-yl)-1*H*,3*H*-benzo[4,5]imidazo[2,1-*c*][1,4]thiazepine (**3f**)

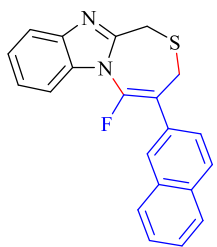

Compound (**3f**) was isolated as a yellow-orange solid after flash chromatography (petroleum ether/EtOAc = 10:4), 52 mg, 75% yield, m.p.: 162–164 °C,  $R_f$  = 0.27.  $^1\text{H}$  NMR (400 MHz,  $\text{CDCl}_3$ )  $\delta$  7.98–7.93 (m, 3H), 7.87–7.83 (m, 1H), 7.72 (d,  $J$  = 7.0 Hz, 1H), 7.62–7.54 (m, 4H), 7.43–7.35 (m, 2H), 4.23 (d,  $J$  = 75.5 Hz, 2H), 3.49 (d,  $J$  = 113.4 Hz, 2H).  $^{13}\text{C}$  NMR (101 MHz,  $\text{CDCl}_3$ )  $\delta$  151.4, 145.8, 143.1 (d,  $J$  = 4.0 Hz), 134.4, 133.9 (d,  $J$  = 4.6 Hz), 131.7 (d,  $J$  = 2.2 Hz), 129.8, 129.3, 127.7 (d,  $J$  = 2.3 Hz), 127.3, 126.8, 125.9, 125.2, 124.9, 124.7, 120.9, 111.7 (d,  $J$  = 2.5 Hz), 111.1, 110.9, 32.4 (d,  $J$  = 2.3 Hz), 26.0.  $^{19}\text{F}$  NMR (377 MHz,  $\text{CDCl}_3$ )  $\delta$  -95.75. HRMS (ESI-TOF)  $m/z$   $[\text{M}+\text{H}]^+$  calcd for  $\text{C}_{21}\text{H}_{16}\text{FN}_2\text{S}$  347.1018, found 347.1024.

5-fluoro-4-(4-fluorophenyl)-1*H*,3*H*-benzo[4,5]imidazo[2,1-*c*][1,4]thiazepine (**3g**)

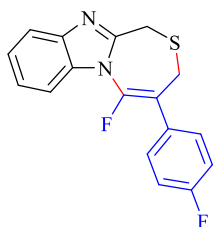

Compound (**3g**) was isolated as yellow crystals after flash chromatography (petroleum ether/EtOAc = 10:3), 24 mg, 38% yield, m.p.: 224–226 °C,  $R_f$  = 0.51.  $^1\text{H}$  NMR (600 MHz,  $\text{CDCl}_3$ )  $\delta$  7.83–7.79 (m, 1H), 7.72–7.67 (m, 2H), 7.56–7.51 (m, 1H), 7.40–7.36 (m, 2H), 7.17 (t,  $J$  = 8.6 Hz, 2H), 4.15 (s, 2H), 3.41 (d,  $J$  = 1.6 Hz, 2H).  $^{13}\text{C}$  NMR (101 MHz,  $\text{CDCl}_3$ )  $\delta$  161.8, 151.2, 130.5 (dd,  $J$  = 8.2, 4.9 Hz), 129.8, 125.1, 124.9, 120.7, 116.5, 116.2, 111.6 (d,  $J$  = 2.3 Hz), 111.1, 110.9, 31.3 (d,  $J$  = 2.3 Hz), 25.5.  $^{19}\text{F}$  NMR (377 MHz,  $\text{CDCl}_3$ )  $\delta$  -98.50, -111.96. HRMS (ESI-TOF)  $m/z$   $[\text{M}+\text{H}]^+$  calcd for  $\text{C}_{17}\text{H}_{13}\text{F}_2\text{N}_2\text{S}$  315.0786, found 315.0778.



4-(4-chlorophenyl)-5-fluoro-1*H*,3*H*-benzo[4,5]imidazo[2,1-*c*][1,4] thiazepine (**3h**)

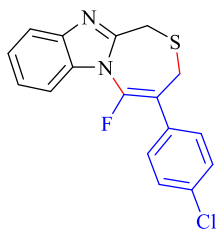

Compound (**3h**) was isolated as a yellow-orange solid after flash chromatography (petroleum ether/EtOAc = 10:3), 52 mg, 78% yield, m.p.: 237–239 °C,  $R_f$  = 0.44.  $^1\text{H}$  NMR (400 MHz,  $\text{CDCl}_3$ )  $\delta$  7.83–7.79 (m, 1H), 7.65 (d,  $J$  = 8.2 Hz, 2H), 7.55–7.51 (m, 1H), 7.45 (d,  $J$  = 8.4 Hz, 2H), 7.39–7.36 (m, 2H), 4.14 (s, 2H), 3.40 (d,  $J$  = 1.6 Hz, 2H).  $^{13}\text{C}$  NMR (101 MHz,  $\text{CDCl}_3$ )  $\delta$  150.5, 144.6, 142.5, 141.9, 134.4, 133.1 (d,  $J$  = 4.9 Hz), 131.7 (d,  $J$  = 4.9 Hz), 129.2 (d,  $J$  = 5.1 Hz), 128.8, 124.3, 124.1, 120.3, 110.9 (d,  $J$  = 2.4 Hz), 109.9, 109.8, 30.5 (d,  $J$  = 2.1 Hz), 25.1.  $^{19}\text{F}$  NMR (377 MHz,  $\text{CDCl}_3$ )  $\delta$  -97.29. HRMS (ESI-TOF)  $m/z$   $[\text{M}+\text{H}]^+$  calcd for  $\text{C}_{17}\text{H}_{13}\text{ClFN}_2\text{S}$  331.0477, found 331.0484.

5-fluoro-4-(4-(trifluoromethyl) phenyl)-1*H*,3*H*-benzo [4,5] imidazo[2,1-*c*] [1,4] thiazepine (**3i**)

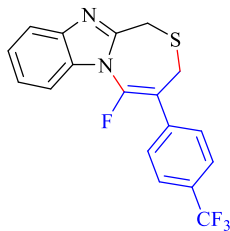

Compound (**3i**) was isolated as light-yellow crystals after flash chromatography (petroleum ether/EtOAc = 10:3), 56 mg, 78% yield, m.p.: 179–181 °C,  $R_f$  = 0.54.  $^1\text{H}$  NMR (600 MHz,  $\text{CDCl}_3$ )  $\delta$  7.85–7.80 (m, 3H), 7.74 (d,  $J$  = 8.2 Hz, 2H), 7.55 (dd,  $J$  = 6.3, 3.1 Hz, 1H), 7.41–7.37 (m, 2H), 4.17 (s, 2H), 3.44 (d,  $J$  = 1.5 Hz, 2H).  $^{13}\text{C}$  NMR (151 MHz,  $\text{CDCl}_3$ )  $\delta$  150.8 (d,  $J$  = 2.0 Hz), 145.4, 143.6, 142.9, 137.5, 133.6 (d,  $J$  = 4.5 Hz), 131.0, 130.8, 128.8 (d,  $J$  = 4.9 Hz), 126.1 (q,  $J$  = 3.8 Hz), 125.1, 124.9, 124.7, 120.8, 111.5 (d,  $J$  = 2.4 Hz), 110.3 (d,  $J$  = 16.5 Hz), 31.0 (d,  $J$  = 2.1 Hz), 25.6.  $^{19}\text{F}$  NMR (565 MHz,  $\text{CDCl}_3$ )  $\delta$  -93.42, -126.79. HRMS (ESI-TOF)  $m/z$   $[\text{M}+\text{H}]^+$  calcd for  $\text{C}_{18}\text{H}_{13}\text{F}_4\text{N}_2\text{S}$  365.0736, found 365.0741.

4-(5-fluoro-1*H*,3*H*-benzo[4,5]imidazo[2,1-*c*][1,4]thiazepin-4-yl)benzonitrile (**3j**)

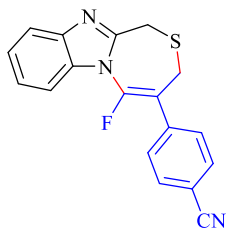

Compound (**3j**) was isolated as a dark brown solid after flash chromatography (petroleum ether/EtOAc = 10:3), 52 mg, 81% yield, m.p.: 249–251 °C,  $R_f$  = 0.42.  $^1\text{H}$  NMR (400 MHz,  $\text{CDCl}_3$ )  $\delta$  7.85–7.80 (m, 3H), 7.76 (d,  $J$  = 8.5 Hz, 2H), 7.56–7.52 (m, 1H), 7.41–7.37 (m, 2H), 4.16 (s, 2H), 3.44 (d,  $J$  = 1.5 Hz, 2H).  $^{13}\text{C}$  NMR (101 MHz,  $\text{CDCl}_3$ )  $\delta$  150.8 (d,  $J$  = 2.1 Hz), 146.3, 143.6, 142.9, 138.7 (d,  $J$  = 5.2 Hz), 133.6 (d,  $J$  = 4.5 Hz), 132.9, 129.2 (d,  $J$  = 5.3 Hz), 125.2, 124.9, 120.9, 118.8, 112.7, 111.6 (d,  $J$  = 2.5 Hz), 110.1, 109.9, 30.9 (d,  $J$  = 2.0 Hz), 25.7.  $^{19}\text{F}$  NMR (377 MHz,  $\text{CDCl}_3$ )  $\delta$  -94.68. HRMS (ESI-TOF)  $m/z$   $[\text{M}+\text{H}]^+$  calcd for  $\text{C}_{18}\text{H}_{13}\text{FN}_3\text{S}$  322.0814, found 322.0813.

ethyl 4-(5-fluoro-1H,3H-benzo[4,5]imidazo[2,1-c][1,4]thiazepin-4-yl)benzoate (**3k**)

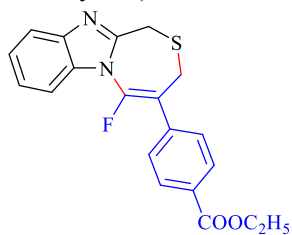

Compound (**3k**) was isolated as a dark brown solid after flash chromatography (petroleum ether/EtOAc = 10:3), 57 mg, 79% yield, m.p.: 272–274 °C,  $R_f$  = 0.41.  $^1\text{H}$  NMR (600 MHz,  $\text{CDCl}_3$ )  $\delta$  8.05–8.02 (m, 2H), 7.71–7.66 (m, 3H), 7.45–7.43 (m, 1H), 7.29–7.27 (m, 2H), 4.32 (d,  $J$  = 7.2 Hz, 2H), 4.06 (s, 2H), 3.34 (d,  $J$  = 1.5 Hz, 2H), 1.32 (s, 3H).  $^{13}\text{C}$  NMR (101 MHz,  $\text{CDCl}_3$ )  $\delta$  165.8, 150.4 (d,  $J$  = 2.1 Hz), 145.2, 142.4, 137.8 (d,  $J$  = 5.1 Hz), 133.1 (d,  $J$  = 4.6 Hz), 130.2, 129.7, 127.9 (d,  $J$  = 5.0 Hz), 124.4, 124.1, 120.3, 110.9 (d,  $J$  = 2.3 Hz), 110.1 (d,  $J$  = 16.3 Hz), 61.0, 30.4 (d,  $J$  = 2.2 Hz), 25.1, 14.2.  $^{19}\text{F}$  NMR (377 MHz,  $\text{CDCl}_3$ )  $\delta$  -95.99. HRMS (ESI-TOF)  $m/z$   $[\text{M}+\text{H}]^+$  calcd for  $\text{C}_{20}\text{H}_{18}\text{FN}_2\text{O}_2\text{S}$  369.1073, found 369.1064.

4-(3-chlorophenyl)-5-fluoro-1H,3H-benzo[4,5]imidazo[2,1-c][1,4]thiazepine (**3l**)

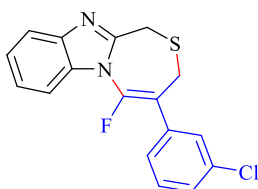

Compound (**3l**) was isolated as Light green crystals after flash chromatography (petroleum ether/EtOAc = 10:3), 44 mg, 66% yield, m.p.: 254–256 °C,  $R_f$  = 0.52.  $^1\text{H}$  NMR (600 MHz,  $\text{CDCl}_3$ )  $\delta$  7.82–7.80 (m, 1H), 7.71–7.70 (m, 1H), 7.59 (dd,  $J$  = 7.4, 1.4 Hz, 1H), 7.54 (d,  $J$  = 7.0 Hz, 1H), 7.43–7.36 (m, 4H), 4.15 (s, 2H), 3.41 (d,  $J$  = 1.5 Hz, 2H).  $^{13}\text{C}$  NMR (151 MHz,  $\text{CDCl}_3$ )  $\delta$  150.5 (d,  $J$  = 2.0 Hz), 144.6, 142.8, 142.5, 135.2 (d,  $J$  = 4.8 Hz), 134.6, 133.2 (d,  $J$  = 4.7 Hz), 129.9, 128.6, 128.1 (d,  $J$  = 5.0 Hz), 1126.2 (d,  $J$  = 4.5 Hz), 124.5, 124.2, 120.4, 111.1 (d,  $J$  = 2.5 Hz), 109.9 (d,  $J$  = 16.4 Hz), 30.6 (d,  $J$  = 2.1 Hz), 25.2.  $^{19}\text{F}$  NMR (565 MHz,  $\text{CDCl}_3$ )  $\delta$  -95.50. HRMS (ESI-TOF)  $m/z$   $[\text{M}+\text{H}]^+$  calcd for  $\text{C}_{17}\text{H}_{13}\text{ClFN}_2\text{S}$  331.0472, found 331.0477.

4-(3,5-difluorophenyl)-5-fluoro-1H,3H-benzo[4,5]imidazo[2,1-c][1,4]thiazepine (**3m**)

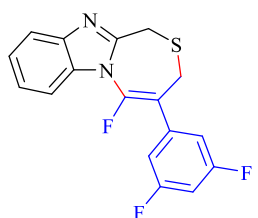

Compound (**3m**) was isolated as light colorless crystals after flash chromatography (petroleum ether/EtOAc = 10:3), 28 mg, 42% yield, m.p.: 200–202 °C,  $R_f$  = 0.50.  $^1\text{H}$  NMR (400 MHz,  $\text{CDCl}_3$ )  $\delta$  7.83–7.77 (m, 1H), 7.53 (dd,  $J$  = 4.6, 2.6 Hz, 1H), 7.40–7.36 (m, 2H), 7.26 (m,  $J$  = 5.5, 2.1 Hz, 2H), 6.86 (s, 1H), 4.14 (s, 2H), 3.40 (s, 2H).  $^{13}\text{C}$  NMR (101 MHz,  $\text{CDCl}_3$ )  $\delta$  163.5 (dd,  $J$  = 249.0, 13.1 Hz), 150.8 (d,  $J$  = 1.9 Hz), 143.0, 133.7, 125.2, 124.9, 120.9, 111.9, 111.8, 111.6, 111.6, 111.5, 104.6 (t,  $J$  = 25.2 Hz), 30.9 (d,  $J$  = 2.0 Hz), 25.7.  $^{19}\text{F}$  NMR (377 MHz,  $\text{CDCl}_3$ )  $\delta$  -94.88, -108.65. HRMS (ESI-TOF)  $m/z$   $[\text{M}+\text{H}]^+$  calcd for  $\text{C}_{17}\text{H}_{12}\text{F}_3\text{N}_2\text{S}$  333.0672, found 333.0674.

4-(3,5-dichlorophenyl)-5-fluoro-1*H*,3*H*-benzo[4,5]imidazo[2,1-*c*][1,4]thiazepine (**3n**)

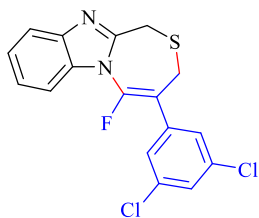

Compound (**3n**) was isolated as a dark yellow solid after flash chromatography (petroleum ether/EtOAc = 10:4), 49 mg, 66 % yield, m.p.: 202–204 °C,  $R_f$  = 0.47.  $^1\text{H}$  NMR (600 MHz,  $\text{CDCl}_3$ )  $\delta$  7.82–7.79 (m, 1H), 7.59 (d,  $J$  = 1.8 Hz, 2H), 7.52 (dd,  $J$  = 5.9, 3.4 Hz, 1H), 7.41–7.36 (m, 3H), 4.14 (s, 2H), 3.38 (d,  $J$  = 1.5 Hz, 2H).  $^{13}\text{C}$  NMR (151 MHz,  $\text{CDCl}_3$ )  $\delta$  150.7, 145.6, 143.8, 143.0, 136.7 (d,  $J$  = 4.9 Hz), 135.8, 133.5 (d,  $J$  = 4.6 Hz), 128.9, 126.9 (d,  $J$  = 5.2 Hz), 125.0, 124.7, 120.9, 111.4 (d,  $J$  = 2.5 Hz), 109.2 (d,  $J$  = 16.4 Hz), 30.8 (d,  $J$  = 2.1 Hz), 25.6.  $^{19}\text{F}$  NMR (565 MHz,  $\text{CDCl}_3$ )  $\delta$  -93.08. HRMS (ESI-TOF)  $m/z$   $[\text{M}+\text{H}]^+$  calcd for  $\text{C}_{17}\text{H}_{12}\text{Cl}_2\text{FN}_2\text{S}$ , 365.0082 found 365.0085.

4-(dibenzo[*b,d*]furan-4-yl)-5-fluoro-1*H*,3*H*-benzo [4,5] imidazo[2,1-*c*] [1,4] thiazepine (**3o**)

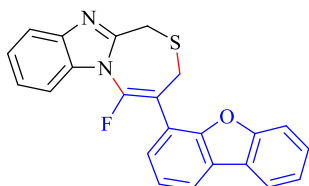

Compound **3o** was isolated as a light-yellow solid after flash chromatography (petroleum ether/EtOAc = 10:3), 59 mg, 70% yield, m.p.: 192–194 °C.  $R_f$  = 0.39.  $^1\text{H}$  NMR (600 MHz,  $\text{CDCl}_3$ )  $\delta$  8.04–7.99 (m, 2H), 7.85–7.83 (m, 1H), 7.64 (dt,  $J$  = 7.5, 0.9 Hz, 1H), 7.61 (dt,  $J$  = 8.2, 0.8 Hz, 1H), 7.55 (s, 1H), 7.53–7.43 (m, 2H), 7.42–7.35 (m, 3H), 4.30 (s, 2H), 3.66 (d,  $J$  = 1.4 Hz, 2H).  $^{13}\text{C}$  NMR (151 MHz,  $\text{CDCl}_3$ )  $\delta$  156.5, 153.8, 151.5, 145.5, 143.6, 142.9, 133.5 (d,  $J$  = 4.4 Hz), 128.0, 127.5 (d,  $J$  = 3.2 Hz), 125.4, 124.8, 124.5, 124.3, 123.5 (d,  $J$  = 5.9 Hz), 121.6, 121.2, 120.7, 117.9 (d,  $J$  = 3.3 Hz), 112.2, 111.7 (d,  $J$  = 2.6 Hz), 107.3 (d,  $J$  = 19.7 Hz), 31.2 (d,  $J$  = 2.6 Hz), 25.8.  $^{19}\text{F}$  NMR (377 MHz,  $\text{CDCl}_3$ )  $\delta$  -94.63. HRMS (ESI-TOF)  $m/z$   $[\text{M}+\text{H}]^+$  calcd for  $\text{C}_{23}\text{H}_{16}\text{FN}_2\text{S}$  387.0967, found 387.0971.

4-(benzo[*b*]thiophen-2-yl)-5-fluoro-1*H*,3*H*-benzo[4,5]imidazo[2,1-*c*][1,4]thiazepine (**3p**)

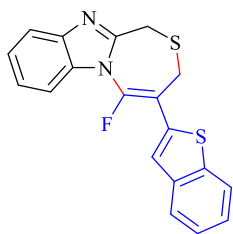

Compound **3p** was isolated as an orange solid after flash chromatography (eluting with petroleum ether/EtOAc = 10:4), 46 mg, 65% yield, m.p.: 243–245 °C,  $R_f$  = 0.42.  $^1\text{H}$  NMR (400 MHz,  $\text{CDCl}_3$ )  $\delta$  7.89–7.85 (m, 1H), 7.82 (m,  $J$  = 6.6, 3.9 Hz, 2H), 7.61 (s, 1H), 7.59–7.55 (m, 1H), 7.40 (m,  $J$  = 5.0, 4.5, 2.1 Hz, 4H), 4.13 (s, 2H), 3.58 (d,  $J$  = 1.4 Hz, 2H).  $^{13}\text{C}$  NMR (101 MHz,  $\text{CDCl}_3$ )  $\delta$  150.6 (d,  $J$  = 2.5 Hz), 142.8, 140.2 (d,  $J$  = 7.0 Hz), 139.4, 134.5 (d,  $J$  = 9.3 Hz), 133.5 (d,  $J$  = 4.8 Hz), 125.5, 124.9, 124.8, 124.5, 124.1, 123.9, 123.9, 122.2, 120.6, 111.4 (d,  $J$  = 2.4 Hz), 106.8 (d,  $J$  = 16.8 Hz), 29.9 (d,  $J$  = 2.7 Hz), 25.5.  $^{19}\text{F}$  NMR (377 MHz,  $\text{CDCl}_3$ )  $\delta$  -91.60. HRMS (ESI-TOF)  $m/z$   $[\text{M}+\text{H}]^+$  calcd for  $\text{C}_{19}\text{H}_{14}\text{FN}_2\text{S}_2$  353.0582, found 353.0589.

4-(5-fluoro-8,9-dimethyl-1*H*,3*H*-benzo[4,5]imidazo[2,1-*c*][1,4]thiazepin-4-yl)benzonitrile (**3q**)

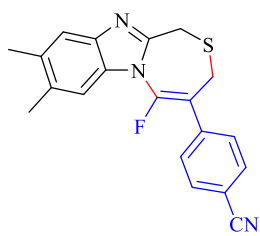

Compound **3q** was isolated as a dark brown solid after flash chromatography (petroleum ether/EtOAc = 10:3), 62 mg, 89% yield, m.p.: 233–235 °C,  $R_f$  = 0.31.  $^1\text{H}$  NMR (400 MHz,  $\text{CDCl}_3$ )  $\delta$  7.82 (d,  $J$  = 8.1 Hz, 2H), 7.75 (d,  $J$  = 8.1 Hz, 2H), 7.54 (s, 1H), 7.30 (s, 1H), 4.12 (s, 2H), 3.41 (s, 2H), 2.39 (s, 6H).  $^{13}\text{C}$  NMR (101 MHz,  $\text{CDCl}_3$ )  $\delta$  149.5 (d,  $J$  = 1.9 Hz), 146.3, 143.6, 141.2, 138.6 (d,  $J$  = 5.2 Hz), 134.2, 133.6, 132.6, 131.8 (d,  $J$  = 4.7 Hz), 128.9 (d,  $J$  = 5.2 Hz), 120.6, 118.6, 112.1, 111.5 (d,  $J$  = 2.4 Hz), 109.3, 109.1, 30.6 (d,  $J$  = 2.1 Hz), 25.4, 20.5 (d,  $J$  = 19.4 Hz).  $^{19}\text{F}$  NMR (377 MHz,  $\text{CDCl}_3$ )  $\delta$  -94.34. HRMS (ESI-TOF)  $m/z$   $[\text{M}+\text{H}]^+$  calcd for  $\text{C}_{20}\text{H}_{17}\text{FN}_3\text{S}$  350.1127, found 350.1131.

4-(8,9-dichloro-5-fluoro-1*H*,3*H*-benzo[4,5]imidazo[2,1-*c*][1,4]thiazepin-4-yl)benzonitrile (**3r**)

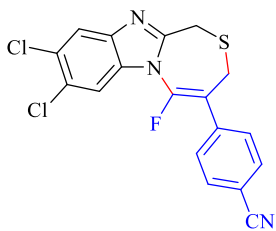

Compound (**3r**) was isolated as yellow crystals after flash chromatography (petroleum ether/EtOAc = 10:3), 61 mg, 73% yield, m.p.: 269–271 °C,  $R_f$  = 0.34.  $^1\text{H}$  NMR (600 MHz,  $\text{CDCl}_3$ )  $\delta$  7.90 (s, 1H), 7.82 (d,  $J$  = 8.2 Hz, 2H), 7.78 (d,  $J$  = 8.4 Hz, 2H), 7.66 (d,  $J$  = 1.5 Hz, 1H), 4.13 (s, 2H), 3.43 (d,  $J$  = 1.6 Hz, 2H).  $^{13}\text{C}$  NMR (151 MHz,  $\text{CDCl}_3$ )  $\delta$  152.2, 144.4, 142.6, 141.9, 137.7 (d,  $J$  = 5.4 Hz), 132.5, 132.1 (d,  $J$  = 4.5 Hz), 128.9, 128.8, 128.7 (d,  $J$  = 5.2 Hz), 121.7, 118.2, 112.6 (d,  $J$  = 2.5 Hz), 112.5, 110.4, 110.3, 30.3, 25.1.  $^{19}\text{F}$  NMR (377 MHz,  $\text{CDCl}_3$ )  $\delta$  -95.58. HRMS (ESI-TOF)  $m/z$   $[\text{M}+\text{H}]^+$  calcd for  $\text{C}_{18}\text{H}_{11}\text{Cl}_2\text{FN}_3\text{S}$  390.0035, found 390.0037.

4-(5-fluoro-1*H*,3*H*-naphtho[2',3':4,5]imidazo[2,1-*c*][1,4]thiazepin-4-yl)benzonitrile (**3s**)

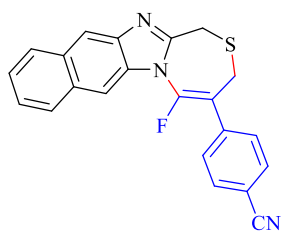

Compound (**3s**) was isolated as a dark orange solid after flash chromatography (petroleum ether/EtOAc = 10:3), 68 mg, 92 % yield, m.p.: 239–241 °C,  $R_f$  = 0.30.  $^1\text{H}$  NMR (600 MHz,  $\text{CDCl}_3$ )  $\delta$  8.27 (s, 1H), 8.05–8.02 (m, 1H), 7.95 (d,  $J$  = 7.6 Hz, 2H), 7.87 (d,  $J$  = 8.1 Hz, 2H), 7.80–7.77 (m, 2H), 7.50 (td,  $J$  = 7.2, 1.5 Hz, 2H), 4.21 (s, 2H), 3.49 (d,  $J$  = 1.4 Hz, 2H).  $^{13}\text{C}$  NMR (151 MHz,  $\text{CDCl}_3$ )  $\delta$  150.7 (d,  $J$  = 2.1 Hz), 144.0, 142.6, 142.2, 141.3, 140.2, 133.3 (d,  $J$  = 4.5 Hz), 132.2 (d,  $J$  = 5.2 Hz), 128.8, 128.4 (d,  $J$  = 4.9 Hz), 127.7, 127.3, 127.0, 124.3, 124.1, 120.3, 111.1 (d,  $J$  = 2.3 Hz), 110.7 (d,  $J$  = 16.4 Hz), 30.6 (d,  $J$  = 2.4 Hz), 25.2.  $^{19}\text{F}$  NMR (565 MHz,  $\text{CDCl}_3$ )  $\delta$  -95.50. HRMS (ESI-TOF)  $m/z$   $[\text{M}+\text{H}]^+$  calcd for  $\text{C}_{22}\text{H}_{15}\text{FN}_3\text{S}$  372.0971, found 372.0967.

4-([1,1'-biphenyl]-4-yl)-3-fluoro-1H,5H-benzo[4,5]imidazo[2,1-c][1,4]oxazepine (**5a**)

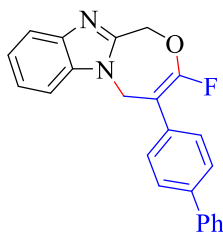

Compound (**5a**) was isolated as colorless crystals after flash chromatography (petroleum ether/EtOAc = 1:1), 62 mg, 88% yield, m.p.: 136–138 °C,  $R_f$  = 0.55.  $^1\text{H}$  NMR (600 MHz,  $\text{CDCl}_3$ )  $\delta$  7.84–7.81 (m, 1H), 7.66–7.60 (m, 4H), 7.48–7.42 (m, 5H), 7.39–7.32 (m, 3H), 5.56 (s, 2H), 5.09 (d,  $J$  = 4.2 Hz, 2H).  $^{13}\text{C}$  NMR (151 MHz,  $\text{CDCl}_3$ )  $\delta$  158.8, 157.0, 148.6 (d,  $J$  = 2.3 Hz), 142.1, 140.8, 140.6, 135.2, 133.7 (d,  $J$  = 2.8 Hz), 129.2, 129.0 (d,  $J$  = 3.2 Hz), 127.9, 127.7, 127.3, 123.8, 123.1, 120.6, 109.4, 93.3 (d,  $J$  = 28.4 Hz), 67.5, 44.1 (d,  $J$  = 3.4 Hz).  $^{19}\text{F}$  NMR (565 MHz,  $\text{CDCl}_3$ )  $\delta$  -80.99. HRMS (ESI-TOF)  $m/z$   $[\text{M}+\text{H}]^+$  calcd for  $\text{C}_{23}\text{H}_{18}\text{FN}_2\text{O}$  357.1403, found 357.1407.

3-fluoro-4-(p-tolyl)-1H,5H-benzo[4,5]imidazo[2,1-c][1,4]oxazepine (**5b**)

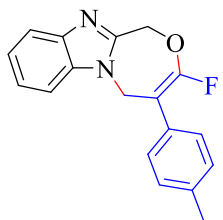

Compound (**5b**) was isolated as a yellow solid after flash chromatography (petroleum ether/EtOAc = 1:1), 33 mg, 56% yield, m.p.: 102–104 °C,  $R_f$  = 0.42.  $^1\text{H}$  NMR (600 MHz,  $\text{CDCl}_3$ )  $\delta$  7.79 (dd,  $J$  = 7.6, 1.4 Hz, 1H), 7.41–7.39 (m, 1H), 7.37–7.31 (m, 2H), 7.25–7.24 (m, 1H), 7.22 (d,  $J$  = 8.0 Hz, 2H), 5.55 (s, 2H), 5.05 (d,  $J$  = 4.2 Hz, 2H), 2.37 (s, 3H).  $^{13}\text{C}$  NMR (151 MHz,  $\text{CDCl}_3$ )  $\delta$  158.4, 148.4, 141.6, 137.7, 134.9, 131.4 (d,  $J$  = 2.8 Hz), 129.5, 128.2 (d,  $J$  = 3.2 Hz), 123.5, 122.9, 120.2, 109.1, 93.3 (d,  $J$  = 28.9 Hz), 67.2, 44.1 (d,  $J$  = 3.4 Hz), 21.2.  $^{19}\text{F}$  NMR (565 MHz,  $\text{CDCl}_3$ )  $\delta$  -79.34. HRMS (ESI-TOF)  $m/z$   $[\text{M}+\text{H}]^+$  calcd for  $\text{C}_{18}\text{H}_{16}\text{FN}_2\text{O}$  295.1247, found 294.1250.

4-(4-(tert-butyl)phenyl)-3-fluoro-1H,5H-benzo[4,5]imidazo[2,1-c][1,4]oxazepine (**5c**)

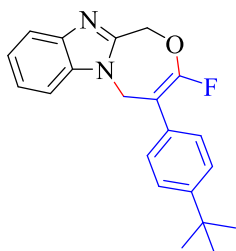

Compound (**5c**) was isolated as off-white crystals after flash chromatography (petroleum ether/EtOAc = 1:1), 41 mg, 61% yield, m.p.: 133–135 °C,  $R_f$  = 0.54.  $^1\text{H}$  NMR (600 MHz,  $\text{CDCl}_3$ )  $\delta$  7.82–7.78 (m, 1H), 7.45–7.40 (m, 3H), 7.38–7.28 (m, 4H), 5.56 (s, 2H), 5.08 (d,  $J$  = 4.1 Hz, 2H), 1.34 (d,  $J$  = 1.3 Hz, 9H).  $^{13}\text{C}$  NMR (151 MHz,  $\text{CDCl}_3$ )  $\delta$  157.5 (d,  $J$  = 269.7 Hz), 150.8, 148.3, 141.3, 134.8, 131.2 (d,  $J$  = 2.8 Hz), 127.9 (d,  $J$  = 3.2 Hz), 125.7, 123.5, 122.9, 120.0, 109.0, 93.5 (d,  $J$  = 28.7 Hz), 67.2, 43.9 (d,  $J$  = 3.4 Hz), 34.6, 31.2.  $^{19}\text{F}$  NMR (565 MHz,  $\text{CDCl}_3$ )  $\delta$  -76.05. HRMS (ESI-TOF)  $m/z$   $[\text{M}+\text{H}]^+$  calcd for  $\text{C}_{21}\text{H}_{22}\text{FN}_2\text{O}$  337.1750, found 337.1754.

3-fluoro-4-phenyl-1H,5H-benzo[4,5]imidazo[2,1-c][1,4]oxazepine (**5d**)

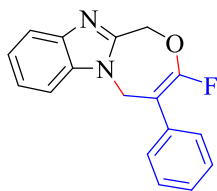

Compound (**5d**) was isolated as a dark brown solid after flash chromatography (petroleum ether/EtOAc = 1:1), 34 mg, 60% yield, m.p.: 122–124 °C,  $R_f$  = 0.59.  $^1\text{H}$  NMR (600 MHz,  $\text{CDCl}_3$ )  $\delta$  7.78 (d,  $J$  = 8.0 Hz, 1H), 7.43–7.38 (m, 3H), 7.36 (m, 3H), 7.32 (m, 2H), 5.54 (s, 2H), 5.07 (d,  $J$  = 4.2 Hz, 2H);  $^{13}\text{C}$  NMR (151 MHz,  $\text{CDCl}_3$ )  $\delta$  157.9 (d,  $J$  = 268.5 Hz), 148.6 (d,  $J$  = 2.5 Hz), 141.9, 135.2, 134.8 (d,  $J$  = 2.7 Hz), 129.4, 129.1, 128.7 (d,  $J$  = 3.0 Hz), 128.1, 123.9, 123.2, 120.5, 109.4, 93.6 (d,  $J$  = 28.5 Hz), 67.4, 44.3 (d,  $J$  = 3.3 Hz).  $^{19}\text{F}$  NMR (565 MHz,  $\text{CDCl}_3$ )  $\delta$  -79.88. HRMS (ESI-TOF)  $m/z$   $[\text{M}+\text{H}]^+$  calcd for  $\text{C}_{17}\text{H}_{14}\text{FN}_2\text{O}$  281.1090, found 281.1089.

3-fluoro-4-(naphthalen-2-yl)-1H,5H-benzo[4,5]imidazo[2,1-c][1,4]oxazepane (**5e**)

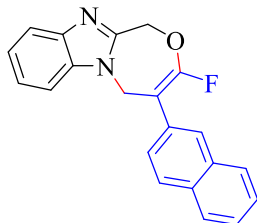

Compound (**5e**) was isolated as an orange solid after flash chromatography (petroleum ether/EtOAc = 1:1), 49 mg, 74% yield, m.p.: 157–159 °C,  $R_f$  = 0.46.  $^1\text{H}$  NMR (600 MHz,  $\text{CDCl}_3$ )  $\delta$  7.93 (d,  $J$  = 8.2 Hz, 1H), 7.89 (d,  $J$  = 8.1 Hz, 1H), 7.87–7.84 (m, 1H), 7.79 (d,  $J$  = 8.4 Hz, 1H), 7.52 (m,  $J$  = 7.8, 5.7, 4.1 Hz, 2H), 7.49–7.44 (m, 2H), 7.36–7.30 (m, 2H), 7.25 (d,  $J$  = 1.8 Hz, 1H), 5.73–5.61 (m, 2H), 5.09–4.97 (m, 2H).  $^{13}\text{C}$  NMR (151 MHz,  $\text{CDCl}_3$ )  $\delta$  157.4 (d,  $J$  = 257.2 Hz), 148.3, 141.8, 135.0, 134.0, 131.9, 131.2, 128.8 (d,  $J$  = 6.9 Hz), 127.9, 126.9, 126.2, 125.6, 124.3, 123.7, 122.9, 120.4, 109.1, 88.5 (d,  $J$  = 32.9 Hz), 66.3, 44.1 (d,  $J$  = 3.3 Hz).  $^{19}\text{F}$  NMR (565 MHz,  $\text{CDCl}_3$ )  $\delta$  -75.99. HRMS (ESI-TOF)  $m/z$   $[\text{M}+\text{H}]^+$  calcd for  $\text{C}_{21}\text{H}_{16}\text{FN}_2\text{O}$  331.1247, found 331.1253.

3-fluoro-4-(4-fluorophenyl)-1H,5H-benzo[4,5]imidazo[2,1-c][1,4]oxazepine (**5f**)

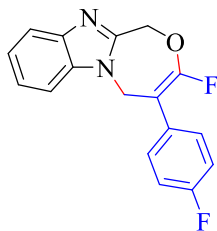

Compound (**5f**) was isolated as a white solid after flash chromatography (petroleum ether/EtOAc = 1:1), 35 mg, 55% yield, m.p.: 167–169 °C,  $R_f$  = 0.54.  $^1\text{H}$  NMR (400 MHz,  $\text{CDCl}_3$ )  $\delta$  7.80 (dd,  $J$  = 6.9, 1.8 Hz, 1H), 7.41–7.30 (m, 6H), 7.13–7.07 (m, 2H), 5.54 (s, 2H), 5.03 (d,  $J$  = 4.3 Hz, 2H);  $^{13}\text{C}$  NMR (101 MHz,  $\text{CDCl}_3$ )  $\delta$  163.1, 160.6, 158.7, 156.1, 147.9, 141.6, 134.7, 130.3, 129.9 (dd,  $J$  = 8.2, 3.0 Hz), 123.4, 122.7, 120.2, 115.6 (d,  $J$  = 21.7 Hz), 108.8, 91.9 (d,  $J$  = 28.8 Hz), 66.9, 43.8 (d,  $J$  = 3.2 Hz).  $^{19}\text{F}$  NMR (377 MHz,  $\text{CDCl}_3$ )  $\delta$  -79.58, -113.69. HRMS (ESI-TOF)  $m/z$   $[\text{M}+\text{H}]^+$  calcd for  $\text{C}_{17}\text{H}_{13}\text{F}_2\text{N}_2\text{O}$  299.0996, found 299.0997.

4-(4-chlorophenyl)-3-fluoro-1H,5H-benzo[4,5]imidazo[2,1-c][1,4]oxazepine (**5g**)

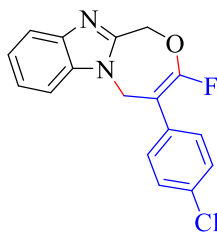

Compound (**5g**) was isolated as light-yellow crystals after flash chromatography (petroleum ether/EtOAc = 1:1), 52 mg, 83% yield, m.p.: 150–152 °C,  $R_f$  = 0.28.  $^1\text{H}$  NMR (400 MHz,  $\text{CDCl}_3$ )  $\delta$  7.78 (dd,  $J$  = 7.0, 1.8 Hz, 1H), 7.36 (dt,  $J$  = 6.9, 2.2 Hz, 4H), 7.32 (dd,  $J$  = 7.2, 2.3 Hz, 1H), 7.28 (s, 1H), 5.53 (s, 2H), 5.01 (d,  $J$  = 4.2 Hz, 2H);  $^{13}\text{C}$  NMR (101 MHz,  $\text{CDCl}_3$ )  $\delta$  159.4, 156.7, 148.5 (d,  $J$  = 2.1 Hz), 142.2, 135.3, 134.0, 133.4 (d,  $J$  = 2.6 Hz), 130.1 (d,  $J$  = 3.2 Hz), 129.4, 124.0, 123.3, 120.8, 109.4, 92.4 (d,  $J$  = 28.5 Hz), 67.5, 44.1 (d,  $J$  = 3.2 Hz).  $^{19}\text{F}$  NMR (377 MHz,  $\text{CDCl}_3$ )  $\delta$  -78.76. HRMS (ESI-TOF)  $m/z$   $[\text{M}+\text{H}]^+$  calcd for  $\text{C}_{17}\text{H}_{13}\text{ClFN}_2\text{O}$  315.0700, found 315.0707.

4-(4-bromophenyl)-3-fluoro-1H,5H-benzo[4,5]imidazo[2,1-c][1,4]oxazepine (**5h**)

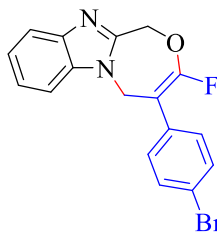

Compound (**5h**) was isolated as a light-yellow solid after flash chromatography (petroleum ether/EtOAc = 1:1), 55 mg, 77% yield, m.p.: 132–134 °C,  $R_f$  = 0.31.  $^1\text{H}$  NMR (600 MHz,  $\text{CDCl}_3$ )  $\delta$  7.81–7.79 (m, 1H), 7.55–7.52 (m, 2H), 7.40–7.31 (m, 3H), 7.23 (dd,  $J$  = 8.6, 1.2 Hz, 2H), 5.56 (s, 2H), 5.04 (d,  $J$  = 4.2 Hz, 2H).  $^{13}\text{C}$  NMR (151 MHz,  $\text{CDCl}_3$ )  $\delta$  158.4, 156.6, 147.9 (d,  $J$  = 2.2 Hz), 141.7, 134.8, 133.4 (d,  $J$  = 2.6 Hz), 131.9, 129.9 (d,  $J$  = 3.2 Hz), 123.5, 122.8, 121.6, 120.3, 108.9, 91.9 (d,  $J$  = 28.4 Hz), 66.9, 43.6 (d,  $J$  = 3.3 Hz).  $^{19}\text{F}$  NMR (565 MHz,  $\text{CDCl}_3$ )  $\delta$  -78.62. HRMS (ESI-TOF)  $m/z$   $[\text{M}+\text{H}]^+$  calcd for  $\text{C}_{17}\text{H}_{13}\text{BrFN}_2\text{O}$  359.0195, found 359.0197.

3-fluoro-4-(4-(trifluoromethyl)phenyl)-1H,5H-benzo[4,5]imidazo[2,1-c][1,4]oxazepine (**5i**)

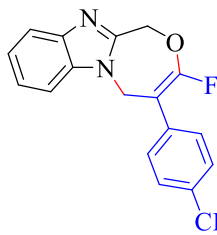

Compound (**5i**) was isolated as a colorless solid after flash chromatography (petroleum ether/EtOAc = 1:1), 48 mg, 61% yield, m.p.: 158–159 °C,  $R_f$  = 0.34.  $^1\text{H}$  NMR (400 MHz,  $\text{CDCl}_3$ )  $\delta$  7.81 (dd,  $J$  = 6.9, 1.7 Hz, 1H), 7.66 (d,  $J$  = 8.2 Hz, 2H), 7.48 (d,  $J$  = 8.1 Hz, 2H), 7.40–7.30 (m, 3H), 5.57 (d,  $J$  = 1.7 Hz, 2H), 5.07 (dd,  $J$  = 4.2, 1.5 Hz, 2H).  $^{13}\text{C}$  NMR (151 MHz,  $\text{CDCl}_3$ )  $\delta$  158.9, 157.1, 147.9 (d,  $J$  = 2.1 Hz), 141.9, 138.6, 134.9, 129.9 (d,  $J$  = 32.7 Hz), 128.9 (d,  $J$  = 3.3 Hz), 125.9 (q,  $J$  = 3.8 Hz), 124.9, 123.8, 123.2, 123.1, 120.6, 109.1, 91.7 (d,  $J$  = 28.2 Hz), 67.0, 43.6 (d,  $J$  = 3.3 Hz).  $^{19}\text{F}$  NMR (565 MHz,  $\text{CDCl}_3$ )  $\delta$  -93.08, 78.94. HRMS (ESI-TOF)  $m/z$   $[\text{M}+\text{H}]^+$  calcd for  $\text{C}_{18}\text{H}_{13}\text{F}_4\text{N}_2\text{O}$  349.0964, found 349.0969.



4-(dibenzo[b,d]furan-4-yl)-3-fluoro-1H,5H-benzo[4,5]imidazo[2,1-c][1,4]oxazepine (**5j**)

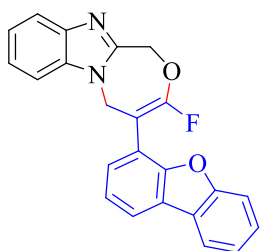

Compound (**5j**) was isolated as an off-white solid after flash chromatography (petroleum ether/EtOAc = 1:1), 33 mg, 45% yield, m.p.: 169–170 °C,  $R_f$  = 0.51.  $^1\text{H}$  NMR (600 MHz,  $\text{CDCl}_3$ )  $\delta$  7.97 (d,  $J$  = 7.6 Hz, 1H), 7.94 (d,  $J$  = 7.6 Hz, 1H), 7.85 (d,  $J$  = 7.9 Hz, 1H), 7.52–7.35 (m, 9H), 5.68 (s, 2H), 5.30 (d,  $J$  = 4.1 Hz, 2H);  $^{13}\text{C}$  NMR (151 MHz,  $\text{CDCl}_3$ )  $\delta$  157.9 (d,  $J$  = 266.1 Hz), 155.8, 153.3, 148.1, 141.4, 135.0, 128.0 (d,  $J$  = 3.7 Hz), 127.5, 124.8, 123.9, 123.4, 123.1, 122.9, 122.8, 120.8, 120.4, 120.2, 118.6 (d,  $J$  = 2.1 Hz), 111.7, 109.6, 66.6, 42.6 (d,  $J$  = 3.4 Hz).  $^{19}\text{F}$  NMR (565 MHz,  $\text{CDCl}_3$ )  $\delta$  -77.91. HRMS (ESI-TOF)  $m/z$   $[\text{M}+\text{H}]^+$  calcd for  $\text{C}_{23}\text{H}_{16}\text{FN}_2\text{O}_2$  371.1196, found 371.1192.

8,9-dichloro-3-fluoro-4-(4-fluorophenyl)-1H,5H-benzo[4,5]imidazo[2,1-c][1,4]oxazepine (**5k**)

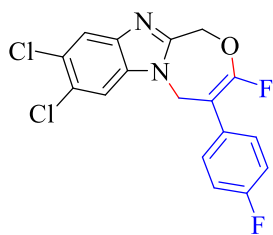

Compound (**5k**) was isolated as a colorless solid after flash chromatography (petroleum ether/EtOAc = 1:1), 46 mg, 63% yield, m.p.: 175–177 °C,  $R_f$  = 0.47.  $^1\text{H}$  NMR (600 MHz,  $\text{CDCl}_3$ )  $\delta$  7.87 (s, 1H), 7.50 (s, 1H), 7.32–7.29 (m, 2H), 7.11 (t,  $J$  = 8.6 Hz, 2H), 5.52 (s, 2H), 4.97 (d,  $J$  = 4.2 Hz, 2H).  $^{13}\text{C}$  NMR (151 MHz,  $\text{CDCl}_3$ )  $\delta$  162.9, 161.2, 158.4, 156.6, 150.1 (d,  $J$  = 2.3 Hz), 140.9, 133.9, 129.9 (dd,  $J$  = 8.2, 3.1 Hz), 129.8 (t,  $J$  = 3.2 Hz), 127.7, 127.0, 121.4, 115.9, 115.8, 110.5, 92.4 (d,  $J$  = 29.0 Hz), 66.9, 44.4 (d,  $J$  = 3.0 Hz).  $^{19}\text{F}$  NMR (377 MHz,  $\text{CDCl}_3$ )  $\delta$  -79.38, -113.19. HRMS (ESI-TOF)  $m/z$   $[\text{M}+\text{H}]^+$  calcd for  $\text{C}_{17}\text{H}_{11}\text{Cl}_2\text{F}_2\text{N}_2\text{O}$  367.0216, found 367.0220.

4-([1,1'-biphenyl]-4-yl)-8,9-dichloro-5-fluoro-1H,3H-benzo[4,5]imidazo[2,1-c][1,4]oxazepine(**5l**)

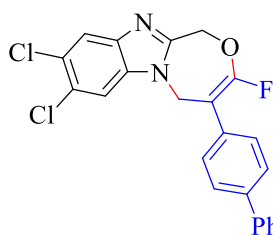

Compound **5l** was isolated as a brown solid after flash chromatography (petroleum ether/EtOAc = 1:1), 39 mg, 46% yield, m.p.: 210–212 °C,  $R_f$  = 0.56.  $^1\text{H}$  NMR (600 MHz,  $\text{CDCl}_3$ )  $\delta$  7.88 (s, 1H), 7.66–7.64 (m, 2H), 7.62–7.59 (m, 2H), 7.54 (s, 1H), 7.46 (t,  $J$  = 7.7 Hz, 2H), 7.43–7.41 (m, 2H), 7.38 (d,  $J$  = 7.4 Hz, 1H), 5.55 (s, 2H), 5.05 (d,  $J$  = 4.0 Hz, 2H).  $^{13}\text{C}$  NMR (151 MHz,  $\text{CDCl}_3$ )  $\delta$  158.6, 156.8, 140.8, 140.8, 140.2, 134.0, 132.7 (d,  $J$  = 3.2 Hz), 128.8, 128.7, 128.5 (d,  $J$  = 3.5 Hz), 127.8, 127.6, 127.5, 127.1, 126.9, 126.8, 126.8, 126.7, 121.3, 110.6, 93.5 (d,  $J$  = 28.6 Hz), 67.1, 44.3 (d,  $J$  = 3.1 Hz).  $^{19}\text{F}$  NMR (565 MHz,  $\text{CDCl}_3$ )  $\delta$  -81.90. HRMS (ESI-TOF)  $m/z$   $[\text{M}+\text{H}]^+$  calcd for  $\text{C}_{23}\text{H}_{16}\text{Cl}_2\text{FN}_2\text{O}$  425.0624, found 425.0627.



8,9-dibromo-3-fluoro-4-(p-tolyl)-1H,5H-benzo[4,5]imidazo[2,1-c][1,4]oxazepine (**5m**)

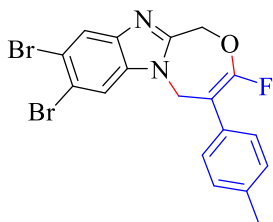

Compound **5m** was isolated as an off-white solid after flash chromatography (eluting with petroleum ether/EtOAc = 1:1), 52 mg, 58% yield, m.p.: 176–178 °C,  $R_f$  = 0.50.  $^1\text{H}$  NMR (600 MHz,  $\text{CDCl}_3$ )  $\delta$  8.04 (s, 1H), 7.68 (s, 1H), 7.23 (s, 4H), 5.50 (s, 2H), 4.98 (d,  $J$  = 4.1 Hz, 2H), 2.38 (s, 3H).  $^{13}\text{C}$  NMR (151 MHz,  $\text{CDCl}_3$ )  $\delta$  158.4, 156.6, 150.3 (d,  $J$  = 2.2 Hz), 142.1, 137.9, 135.1, 130.8 (d,  $J$  = 3.2 Hz), 129.6, 128.1 (d,  $J$  = 3.2 Hz), 124.7, 118.9, 118.1, 113.8, 93.7 (d,  $J$  = 28.9 Hz), 67.2, 44.5 (d,  $J$  = 3.3 Hz), 21.2.  $^{19}\text{F}$  NMR (565 MHz,  $\text{CDCl}_3$ )  $\delta$  -81.53. HRMS (ESI-TOF)  $m/z$   $[\text{M}+\text{H}]^+$  calcd for  $\text{C}_{18}\text{H}_{14}\text{Br}_2\text{FN}_2\text{O}$  452.9436, found 452.9429.

4-(3,5-dichlorophenyl)-3-fluoro-1H,5H-naphtho[2',3':4,5]imidazo[2,1-c][1,4]oxazepine (**5n**)

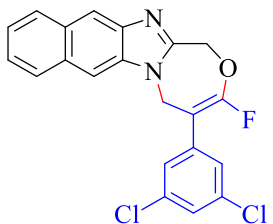

Compound (**5n**) was isolated as a light brown solid after flash chromatography (petroleum ether/EtOAc = 1:1), 31 mg, 39 % yield, m.p.: 138–140 °C,  $R_f$  = 0.49.  $^1\text{H}$  NMR (600 MHz,  $\text{CDCl}_3$ )  $\delta$  8.27 (s, 1H), 8.01 (dd,  $J$  = 11.4, 8.3 Hz, 2H), 7.87 (s, 1H), 7.81 (dd,  $J$  = 21.0, 7.8 Hz, 2H), 7.48 (dd,  $J$  = 8.3, 1.4 Hz, 1H), 7.45 (dd,  $J$  = 8.2, 1.4 Hz, 1H), 7.38 (d,  $J$  = 2.4 Hz, 1H), 5.64 (s, 2H), 5.31 (d,  $J$  = 3.9 Hz, 2H).  $^{13}\text{C}$  NMR (101 MHz,  $\text{CDCl}_3$ )  $\delta$  152.3, 142.0, 139.8 (d,  $J$  = 14.6 Hz), 135.9, 131.1 (d,  $J$  = 22.1 Hz), 129.1, 127.9, 125.5, 125.2, 124.5, 123.9, 122.4, 122.1 (d,  $J$  = 4.8 Hz), 117.9, 105.5, 68.3, 43.6 (d,  $J$  = 3.8 Hz).  $^{19}\text{F}$  NMR (377 MHz,  $\text{CDCl}_3$ )  $\delta$  -71.05. HRMS (ESI-TOF)  $m/z$   $[\text{M}+\text{H}]^+$  calcd for  $\text{C}_{21}\text{H}_{14}\text{Cl}_2\text{FN}_2\text{O}$  399.0462, found 399.0463.

3-fluoro-4-(4-methoxyphenyl)-1H,5H-naphtho[2',3':4,5]imidazo[2,1-c][1,4]oxazepine (**5o**)

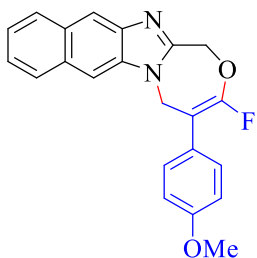

Compound (**5o**) was isolated as a light brown solid after flash chromatography (petroleum ether/EtOAc = 1:1), 52 mg, 76% yield, m.p.: 148–150 °C,  $R_f$  = 0.39.  $^1\text{H}$  NMR (400 MHz,  $\text{CDCl}_3$ )  $\delta$  8.24 (s, 1H), 8.03–7.99 (m, 1H), 7.97–7.93 (m, 1H), 7.76 (s, 1H), 7.44 (m,  $J$  = 7.2, 1.5 Hz, 2H), 7.35–7.29 (m, 2H), 6.98–6.93 (m, 2H), 5.57 (s, 2H), 5.09 (d,  $J$  = 4.1 Hz, 2H), 3.83 (s, 3H).  $^{13}\text{C}$  NMR (101 MHz,  $\text{CDCl}_3$ )  $\delta$  158.9, 158.7, 155.9, 152.3 (d,  $J$  = 2.5 Hz), 141.5, 135.3, 130.4, 130.3, 129.3 (d,  $J$  = 3.3 Hz), 128.4, 127.3, 126.1 (d,  $J$  = 3.2 Hz), 124.7, 123.7, 116.9, 114.1, 104.7, 93.9 (d,  $J$  = 28.7 Hz), 67.6, 55.2, 44.2 (d,  $J$  = 3.1 Hz).  $^{19}\text{F}$  NMR (377 MHz,  $\text{CDCl}_3$ )  $\delta$  -81.43. HRMS (ESI-TOF)  $m/z$   $[\text{M}+\text{H}]^+$  calcd for  $\text{C}_{22}\text{H}_{18}\text{FN}_2\text{O}_2$  361.1352, found 361.1350.

4-([1,1'-biphenyl]-4-yl)-5-fluoro-1*H*,3*H*-[1,4]oxazepino[4,3-*a*]indole (**7a**)

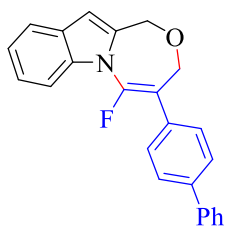

Compound (**7a**) was isolated as brown crystals after flash chromatography (petroleum ether/EtOAc = 10:1), 31 mg, 43% yield, m.p.: 118–120 °C,  $R_f$ =0.42.  $^1\text{H}$  NMR (600 MHz,  $\text{CDCl}_3$ )  $\delta$  7.73–7.64 (m, 9H), 7.48 (dd,  $J$  = 8.4, 7.0 Hz, 2H), 7.40–7.34 (m, 2H), 6.68 (s, 1H), 4.90 (s, 2H), 4.42 (d,  $J$  = 2.3 Hz, 2H).  $^{13}\text{C}$  NMR (151 MHz,  $\text{CDCl}_3$ )  $\delta$  148.8 (d,  $J$  = 272.7 Hz), 140.9, 140.72, 136.6, 136.1 (d,  $J$  = 4.3 Hz), 133.9 (d,  $J$  = 4.7 Hz), 129.2, 129.0, 128.7 (d,  $J$  = 4.9 Hz), 127.9, 127.6, 127.4, 124.2, 122.7, 121.8, 112.8 (d,  $J$  = 5.8 Hz), 105.4 (d,  $J$  = 2.3 Hz), 104.5 (d,  $J$  = 13.9 Hz), 67.6 (d,  $J$  = 5.4 Hz), 61.8.  $^{19}\text{F}$  NMR (565 MHz,  $\text{CDCl}_3$ )  $\delta$  -92.13. . HRMS (ESI-TOF)  $m/z$   $[\text{M}+\text{H}]^+$  calcd for  $\text{C}_{24}\text{H}_{19}\text{FNO}$  356.1451, found 356.1456.

5-fluoro-4-(*p*-tolyl)-1*H*,3*H*-[1,4]oxazepino[4,3-*a*]indole (**7b**)

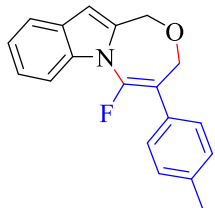

Compound (**7b**) was isolated as a yellow solid after flash chromatography (petroleum ether/EtOAc = 10:1), 27 mg, 46% yield, m.p.: 102–104 °C,  $R_f$ =0.59.  $^1\text{H}$  NMR (600 MHz,  $\text{CDCl}_3$ )  $\delta$  7.68 (m,  $J$  = 8.3, 3.4, 0.9 Hz, 1H), 7.64 (dt,  $J$  = 7.8, 1.0 Hz, 1H), 7.53–7.50 (m, 2H), 7.33 (m,  $J$  = 8.3, 7.1, 1.2 Hz, 1H), 7.27 (d,  $J$  = 1.3 Hz, 1H), 7.26–7.24 (m, 2H), 6.65 (d,  $J$  = 1.0 Hz, 1H), 4.87 (s, 2H), 4.36 (d,  $J$  = 2.4 Hz, 2H), 2.40 (s, 3H).  $^{13}\text{C}$  NMR (151 MHz,  $\text{CDCl}_3$ ) 147.9 (d,  $J$  = 272.1 Hz) 137.5, 136.3, 135.8 (d,  $J$  = 4.1 Hz), 131.7 (d,  $J$  = 4.7 Hz), 129.3, 128.6, 127.8 (d,  $J$  = 4.5 Hz), 123.7, 122.2, 121.4, 112.5 (d,  $J$  = 5.6 Hz), 104.8 (d,  $J$  = 2.2 Hz), 104.5 (d,  $J$  = 14.1 Hz), 67.4 (d,  $J$  = 5.4 Hz), 61.4, 21.2.  $^{19}\text{F}$  NMR (565 MHz,  $\text{CDCl}_3$ )  $\delta$  -88.14. HRMS (ESI-TOF)  $m/z$   $[\text{M}+\text{H}]^+$  calcd for  $\text{C}_{19}\text{H}_{17}\text{FNO}$  294.1294, found 294.1296.

5-fluoro-4-(4-methoxyphenyl)-1*H*,3*H*-[1,4]oxazepino[4,3-*a*]indole (**7c**)

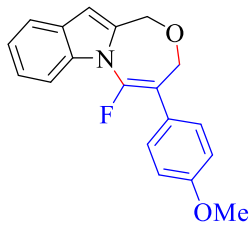

Compound (**7c**) was isolated as a yellow solid after flash chromatography (petroleum ether/EtOAc = 10:1), 32 mg, 52% yield, m.p.: 97–99 °C,  $R_f$ =0.40.  $^1\text{H}$  NMR (600 MHz,  $\text{CDCl}_3$ )  $\delta$  7.69 (m,  $J$  = 8.2, 3.4, 1.0 Hz, 1H), 7.65 (dd,  $J$  = 7.8, 1.0 Hz, 1H), 7.58–7.54 (m, 2H), 7.33 (m,  $J$  = 8.3, 7.1, 1.2 Hz, 1H), 7.00–6.97 (m, 3H), 6.65 (s, 1H), 4.87–4.87 (m, 2H), 4.35 (d,  $J$  = 2.4 Hz, 2H), 3.86 (s, 3H).  $^{13}\text{C}$  NMR (151 MHz,  $\text{CDCl}_3$ )  $\delta$  158.9, 147.5 (d,  $J$  = 271.2 Hz), 136.2, 135.7 (d,  $J$  = 4.4 Hz), 129.1 (d,  $J$  = 4.6 Hz), 128.5, 126.9 (d,  $J$  = 4.5 Hz), 123.6, 122.1, 121.3, 113.9, 112.4 (d,  $J$  = 5.7 Hz), 104.7 (d,  $J$  = 2.0 Hz), 104.2 (d,  $J$  = 14.2 Hz), 67.3 (d,  $J$  = 5.4 Hz), 61.3, 55.3.  $^{19}\text{F}$  NMR (565 MHz,  $\text{CDCl}_3$ )  $\delta$  -99.47. HRMS (ESI-TOF)  $m/z$   $[\text{M}+\text{H}]^+$  calcd for  $\text{C}_{19}\text{H}_{17}\text{FNO}_2$  310.1243, found 310.1240.

5-fluoro-4-(4-nitrophenyl)-1*H*,3*H*-[1,4]oxazepino[4,3-*a*]indole (**7d**)

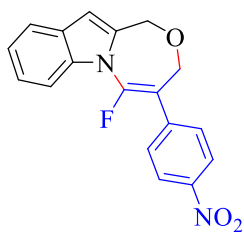

Compound (**7d**) was isolated as dark orange crystals after flash chromatography (petroleum ether/EtOAc = 10:1), 57 mg, 89% yield, m.p.: 141–143 °C,  $R_f$ =0.34.  $^1\text{H}$  NMR (600 MHz,  $\text{CDCl}_3$ )  $\delta$  8.32–8.27 (m, 2H), 7.80–7.76 (m, 2H), 7.70 (dd,  $J$  = 8.3, 3.4 Hz, 1H), 7.66 (dd,  $J$  = 7.9, 1.1 Hz, 1H), 7.37 (m,  $J$  = 8.3, 7.1, 1.2 Hz, 1H), 7.30 (t,  $J$  = 7.5 Hz, 1H), 6.71 (s, 1H), 4.89 (s, 2H), 4.41 (d,  $J$  = 2.2 Hz, 2H).  $^{13}\text{C}$  NMR (151 MHz,  $\text{CDCl}_3$ )  $\delta$  150.9, 149.1, 146.7, 141.7 (d,  $J$  = 5.3 Hz), 135.9, 135.8 (d,  $J$  = 4.4 Hz), 128.8, 128.6, 128.56, 124.3, 123.9, 122.9, 112.5 (d,  $J$  = 6.0 Hz), 112.5, 106.3 (d,  $J$  = 2.1 Hz), 102.6 (d,  $J$  = 13.0 Hz), 66.7 (d,  $J$  = 5.4 Hz), 61.6.  $^{19}\text{F}$  NMR (565 MHz,  $\text{CDCl}_3$ )  $\delta$  -95.83. HRMS (ESI-TOF)  $m/z$   $[\text{M}+\text{H}]^+$  calcd for  $\text{C}_{18}\text{H}_{14}\text{FN}_2\text{O}_3$  325.0988, found 325.0984.

4-(4-chlorophenyl)-5-fluoro-1*H*,3*H*-[1,4]oxazepino[4,3-*a*]indole (**7e**)

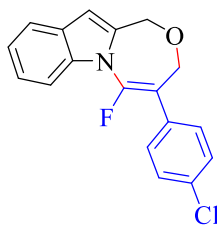

Compound (**7e**) was isolated as a brown solid after flash chromatography (petroleum ether/EtOAc = 10:1), 56 mg, 90 % yield, m.p.: 104–106 °C,  $R_f$ =0.50.  $^1\text{H}$  NMR (600 MHz,  $\text{CDCl}_3$ )  $\delta$  7.68–7.66 (m, 1H), 7.64 (dt,  $J$  = 7.9, 0.9 Hz, 1H), 7.55–7.53 (m, 2H), 7.41–7.39 (m, 2H), 7.33 (m,  $J$  = 8.3, 7.1, 1.2 Hz, 1H), 7.28–7.24 (m, 1H), 6.65 (s, 1H), 4.85 (s, 2H), 4.33 (d,  $J$  = 2.3 Hz, 2H).  $^{13}\text{C}$  NMR (151 MHz,  $\text{CDCl}_3$ )  $\delta$  149.3, 147.5, 136.0, 135.7 (d,  $J$  = 4.4 Hz), 133.3, 133.1 (d,  $J$  = 4.6 Hz), 129.2 (d,  $J$  = 4.8 Hz), 128.7, 128.6, 123.9, 122.4, 121.4, 112.4 (d,  $J$  = 5.9 Hz), 105.2 (d,  $J$  = 2.1 Hz), 103.4 (d,  $J$  = 14.1 Hz), 67.1 (d,  $J$  = 5.2 Hz), 61.4.  $^{19}\text{F}$  NMR (565 MHz,  $\text{CDCl}_3$ )  $\delta$  -95.83. HRMS (ESI-TOF)  $m/z$   $[\text{M}+\text{H}]^+$  calcd for  $\text{C}_{18}\text{H}_{14}\text{ClFNO}$  314.0748, found 314.0751.

4-(4-bromophenyl)-5-fluoro-1*H*,3*H*-[1,4]oxazepino[4,3-*a*] indole (**7f**)

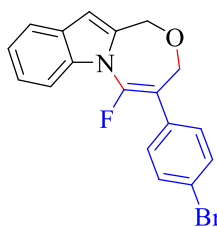

Compound (**7f**) was isolated as a white solid after flash chromatography (petroleum ether/EtOAc = 10:1), 60 mg, 84% yield, m.p.: 101–102 °C,  $R_f$  = 0.52.  $^1\text{H}$  NMR (600 MHz,  $\text{CDCl}_3$ )  $\delta$  7.68 (m,  $J$  = 8.2, 3.4, 1.0 Hz, 1H), 7.65 (dt,  $J$  = 7.8, 1.0 Hz, 1H), 7.58–7.56 (m, 2H), 7.50–7.48 (m, 2H), 7.34 (m,  $J$  = 8.3, 7.2, 1.3 Hz, 1H), 7.29–7.27 (m, 1H), 6.67 (d,  $J$  = 0.9 Hz, 1H), 4.87 (s, 2H), 4.34 (d,  $J$  = 2.4 Hz, 2H).  $^{13}\text{C}$  NMR (151 MHz,  $\text{CDCl}_3$ )  $\delta$  154.0 (d,  $J$  = 2.1 Hz), 145.9, 144.2, 142.4, 138.6 (d,  $J$  = 5.4 Hz), 133.3, 133.3 (d,  $J$  = 4.3 Hz), 132.6, 131.6, 129.2–129.0 (m), 127.9, 127.1, 126.0, 125.2, 118.8, 118.3, 112.5, 109.6 (d,  $J$  = 16.7 Hz), 107.97 (d,  $J$  = 2.6 Hz), 30.9 (d,  $J$  = 2.0 Hz), 25.8.  $^{19}\text{F}$  NMR (565 MHz,  $\text{CDCl}_3$ )  $\delta$  -99.78. HRMS (ESI-TOF)  $m/z$   $[\text{M}+\text{H}]^+$  calcd for  $\text{C}_{18}\text{H}_{14}\text{BrFNO}$  358.0243, found 358.0239.

4-(5-fluoro-1*H*,3*H*-[1,4]oxazepino[4,3-*a*] indol-4-yl) benzonitrile (**7g**)

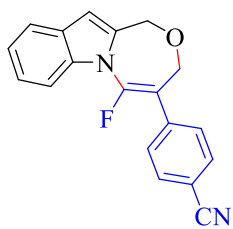

Compound (**7g**) was isolated as red crystals after flash chromatography (petroleum ether/EtOAc = 10:1), 55 mg, 91% yield, m.p.: 151–153 °C,  $R_f$  = 0.49.  $^1\text{H}$  NMR (600 MHz,  $\text{CDCl}_3$ )  $\delta$  7.69 (s, 4H), 7.65 (dd,  $J$  = 8.2, 3.4 Hz, 1H), 7.63 (dd,  $J$  = 7.9, 1.1 Hz, 1H), 7.33 (m,  $J$  = 8.3, 7.1, 1.2 Hz, 1H), 7.27–7.22 (m, 1H), 6.66 (s, 1H), 4.84 (s, 2H), 4.34 (d,  $J$  = 2.2 Hz, 2H).  $^{13}\text{C}$  NMR (151 MHz,  $\text{CDCl}_3$ )  $\delta$  149.4 (d,  $J$  = 275.1 Hz), 139.5 (d,  $J$  = 5.1 Hz), 135.8, 135.6 (d,  $J$  = 4.4 Hz), 132.2, 128.6, 128.3 (d,  $J$  = 5.2 Hz), 124.1, 122.7, 121.5, 118.6, 112.4 (d,  $J$  = 6.0 Hz), 110.8, 105.9 (d,  $J$  = 2.0 Hz), 102.7 (d,  $J$  = 13.1 Hz), 66.7 (d,  $J$  = 5.4 Hz), 61.4.  $^{19}\text{F}$  NMR (565 MHz,  $\text{CDCl}_3$ )  $\delta$  -93.16. HRMS (ESI-TOF)  $m/z$   $[\text{M}+\text{H}]^+$  calcd for  $\text{C}_{19}\text{H}_{14}\text{FN}_2\text{O}$  305.1090, found 305.1097.

4-(dibenzo[*b,d*]furan-4-yl)-5-fluoro-1*H*,3*H*-[1,4]oxazepino[4,3-*a*]indole (**7h**)

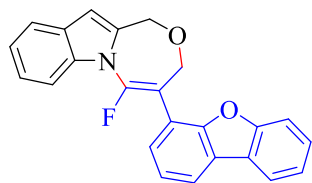

Compound (**7h**) was isolated as dark yellow liquid after flash chromatography (petroleum ether/EtOAc = 10:1), 60 mg, 82% yield,  $R_f$  = 0.34.  $^1\text{H}$  NMR (600 MHz,  $\text{CDCl}_3$ )  $\delta$  7.89–7.84 (m, 2H), 7.61–7.57 (m, 1H), 7.56 (dt,  $J$  = 7.8, 1.0 Hz, 1H), 7.49 (dt,  $J$  = 8.2, 0.8 Hz, 1H), 7.43 (dt,  $J$  = 7.5, 1.0 Hz, 1H), 7.37 (m,  $J$  = 8.4, 7.3, 1.3 Hz, 1H), 7.31 (t,  $J$  = 7.6 Hz, 1H), 7.26 (td,  $J$  = 7.5, 1.0 Hz, 1H), 7.24–7.20 (m, 1H), 7.18–7.13 (m, 1H), 6.60 (d,  $J$  = 1.0 Hz, 1H), 4.90 (s, 2H), 4.49 (d,  $J$  = 2.7 Hz, 2H).  $^{13}\text{C}$  NMR (151 MHz,  $\text{CDCl}_3$ )  $\delta$  156.5, 153.9, 150.2, 148.4, 136.9, 136.0 (d,  $J$  = 4.2 Hz), 129.0, 127.8 (d,  $J$  = 4.3 Hz), 125.1, 124.5, 124.2, 123.3 (d,  $J$  = 6.1 Hz), 122.7, 121.7, 121.1, 120.7, 119.5 (d,  $J$  = 2.3 Hz), 113.1 (d,  $J$  = 6.9 Hz), 112.2, 105.7 (d,  $J$  = 2.0 Hz), 100.2 (d,  $J$  = 17.3 Hz), 67.7 (d,  $J$  = 5.2 Hz), 62.1.  $^{19}\text{F}$  NMR (565 MHz,  $\text{CDCl}_3$ )  $\delta$  -94.56. HRMS (ESI-TOF)  $m/z$   $[\text{M}+\text{H}]^+$  calcd for  $\text{C}_{24}\text{H}_{17}\text{FNO}_2$  370.1243, found 370.1247.

4-(benzo[*b*]thiophen-2-yl)-5-fluoro-1*H*,3*H*-[1,4]oxazepino[4,3-*a*]indole (**7i**)

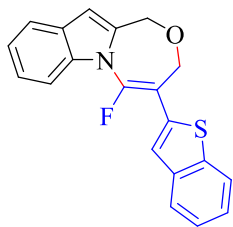

Compound (**7i**) was isolated as brown crystals after flash chromatography (petroleum ether/EtOAc = 10:1), 51 mg, 76% yield, m.p.: 125–127 °C,  $R_f$  = 0.41.  $^1\text{H}$  NMR (400 MHz,  $\text{CDCl}_3$ )  $\delta$  7.82 (dd,  $J$  = 7.1, 1.8 Hz, 1H), 7.76 (dd,  $J$  = 7.0, 1.9 Hz, 1H), 7.70 (dd,  $J$  = 8.2, 3.5 Hz, 1H), 7.63 (d,  $J$  = 7.8 Hz, 1H), 7.51 (s, 1H), 7.33 (td,  $J$  = 6.9, 1.6 Hz, 3H), 7.29–7.22 (m, 1H), 6.66 (s, 1H), 4.83 (s, 2H), 4.50 (d,  $J$  = 2.2 Hz, 2H).  $^{13}\text{C}$  NMR (151 MHz,  $\text{CDCl}_3$ )  $\delta$  149.4, 147.5, 139.6 (d,  $J$  = 7.0 Hz), 139.4, 136.4 (d,  $J$  = 8.5 Hz), 135.8, 135.7 (d,  $J$  = 4.4 Hz), 128.6, 124.6 (d,  $J$  = 5.7 Hz), 124.0, 123.4, 122.6, 121.9, 121.8 (d,  $J$  = 5.4 Hz), 121.4, 112.6 (d,  $J$  = 6.0 Hz), 105.8 (d,  $J$  = 2.0 Hz), 99.9 (d,

$J = 13.9$  Hz), 66.1 (d,  $J = 5.5$  Hz), 61.5.  $^{19}\text{F}$  NMR (565 MHz,  $\text{CDCl}_3$ )  $\delta$  -92.34. HRMS (ESI-TOF)  $m/z$   $[\text{M}+\text{H}]^+$  calcd for  $\text{C}_{20}\text{H}_{15}\text{FNOS}$  336.0858, found 336.0855.

5-fluoro-4-(naphthalen-2-yl)-1*H*,3*H*-[1,4]oxazepino[4,3-*a*]indole (**7j**)

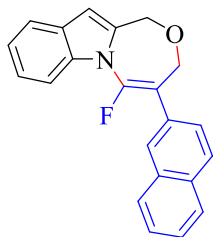

Compound (**7j**) was isolated as a brown liquid after flash chromatography (petroleum ether/EtOAc = 10:1), 51 mg, 78% yield.  $R_f$  = 0.47.  $^1\text{H}$  NMR (600 MHz,  $\text{CDCl}_3$ )  $\delta$  8.03–7.99 (m, 1H), 7.88–7.82 (m, 2H), 7.65–7.59 (m, 2H), 7.53–7.46 (m, 4H), 7.28–7.23 (m, 1H), 7.22–7.18 (m, 1H), 6.65 (s, 1H), 5.01 (s, 2H), 4.39 (d,  $J = 3.3$  Hz, 2H).  $^{13}\text{C}$  NMR (151 MHz,  $\text{CDCl}_3$ )  $\delta$  149.3, 147.5, 136.0, 135.7 (d,  $J = 4.5$  Hz), 133.6 (d,  $J = 4.8$  Hz), 131.9, 131.7, 129.5 (d,  $J = 4.8$  Hz), 128.6 (d,  $J = 7.7$  Hz), 126.9, 123.9, 122.4, 121.4 (d,  $J = 1.8$  Hz), 121.4, 112.4 (d,  $J = 5.8$  Hz), 105.3 (d,  $J = 2.1$  Hz), 103.4 (d,  $J = 13.9$  Hz), 67.1 (d,  $J = 5.2$  Hz), 61.4.  $^{19}\text{F}$  NMR (565 MHz,  $\text{CDCl}_3$ )  $\delta$  -93.79. HRMS (ESI-TOF)  $m/z$   $[\text{M}+\text{H}]^+$  calcd for  $\text{C}_{22}\text{H}_{17}\text{FNO}$  330.1294, found 330.1287.

4-(3,5-dichlorophenyl)-5-fluoro-1*H*,3*H*-[1,4]oxazepino[4,3-*a*]indole (**7k**)

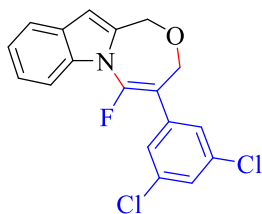

Compound (**7k**) was isolated as White solid after flash chromatography (petroleum ether/EtOAc = 10:1), 44 mg, 64% yield, m.p.: 143–145°C,  $R_f$  = 0.63.  $^1\text{H}$  NMR (600 MHz,  $\text{CDCl}_3$ )  $\delta$  7.70–7.63 (m, 2H), 7.51 (dd,  $J = 1.8, 0.7$  Hz, 2H), 7.37–7.32 (m, 2H), 7.28 (m,  $J = 8.0, 7.1, 1.0$  Hz, 1H), 6.68 (t,  $J = 0.9$  Hz, 1H), 4.87 (d,  $J = 0.6$  Hz, 2H), 4.33 (d,  $J = 2.3$  Hz, 2H).  $^{13}\text{C}$  NMR (151 MHz,  $\text{CDCl}_3$ )  $\delta$  149.4 (d,  $J = 275.1$  Hz), 137.8 (d,  $J = 4.8$  Hz), 136.1, 135.7 (d,  $J = 4.4$  Hz), 135.3, 128.9, 127.6, 126.2 (d,  $J = 5.0$  Hz), 124.3, 122.8, 121.7, 112.4 (d,  $J = 6.0$  Hz), 105.8 (d,  $J = 2.1$  Hz), 102.1 (d,  $J = 13.5$  Hz), 66.8 (d,  $J = 5.3$  Hz), 61.7.  $^{19}\text{F}$  NMR (565 MHz,  $\text{CDCl}_3$ )  $\delta$  -94.30. HRMS (ESI-TOF)  $m/z$   $[\text{M}+\text{H}]^+$  calcd for  $\text{C}_{18}\text{H}_{13}\text{Cl}_2\text{FNO}$  348.0358, found 348.0355.

4-(5-(1*H*-indol-1-yl)-1,11*a*-dihydro-3*H*-11*λ*<sup>2</sup>-benzo[4,5]imidazo[2,3-*c*][1,4]thiazepin-4-yl)benzonitrile (**8**)

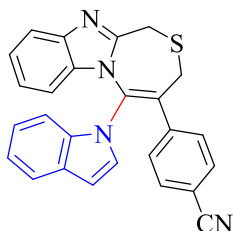

Compound (**8**) was isolated as an orange solid after flash chromatography (petroleum ether/EtOAc = 5:1), 68 mg, 82% yield, m.p.: 289–291,  $R_f$  = 0.54.  $^1\text{H}$  NMR (600 MHz,  $\text{CDCl}_3$ )  $\delta$  7.76 (d,  $J = 8.2$  Hz, 1H), 7.55 (d,  $J = 7.9$  Hz, 1H), 7.51 (d,  $J = 8.0$  Hz, 2H), 7.27–7.24 (m, 3H), 7.21 (t,  $J = 7.7$  Hz, 1H), 7.09 (t,  $J = 7.5$  Hz, 1H), 6.99 (t,  $J = 7.7$  Hz, 1H), 6.95 (t,  $J = 7.7$  Hz, 1H), 6.77 (d,  $J = 3.4$  Hz, 1H), 6.57 (d,  $J = 3.5$  Hz, 1H), 6.29 (d,  $J = 8.2$  Hz, 1H), 4.36 (s, 2H), 3.94–3.44 (m, 2H).  $^{13}\text{C}$  NMR (151 MHz,  $\text{CDCl}_3$ )  $\delta$  151.5, 141.8 (d,  $J = 347.8$  Hz), 133.6, 133.0, 129.5, 128.9, 124.8, 124.3, 124.2, 122.4,

121.9, 121.8, 120.7, 118.6, 112.3, 111.1, 110.6, 32.7, 26.1. HRMS (ESI-TOF)  $m/z$   $[M+H]^+$  calcd for  $C_{26}H_{19}N_4S$  419.1130, found 419.1336

2-(((2-([1,1'-biphenyl]-4-yl)-1,1-difluoroallyl)oxy)methyl)-1-methyl-1H-benzo[d]imidazole (**10**)

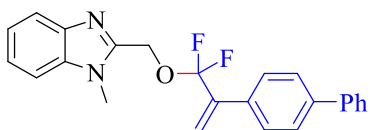

Compound (**10**) was isolated as a light brown solid after flash chromatography (petroleum ether/EtOAc = 1:1), 33 mg, 42% yield, yellow liquid.  $R_f$ =0.61.  $^1H$  NMR (600 MHz,  $CDCl_3$ )  $\delta$  7.79 (d,  $J$  = 7.8 Hz, 1H), 7.60–7.57 (m, 2H), 7.56–7.51 (m, 5H), 7.45 (t,  $J$  = 7.7 Hz, 2H), 7.38–7.33 (m, 3H), 5.95 (s, 1H), 5.71 (d,  $J$  = 1.7 Hz, 1H), 5.34 (s, 2H), 3.75 (s, 3H).  $^{13}C$  NMR (151 MHz,  $CDCl_3$ )  $\delta$  141.2, 140.6, 140.3, 133.9, 128.8, 128.0, 127.5, 126.9 (d,  $J$  = 11.6 Hz), 123.6, 122.7, 122.3, 120.1, 119.5, 109.5, 58.5, 30.1.  $^{19}F$  NMR (565 MHz,  $CDCl_3$ )  $\delta$  -74.97. HRMS (ESI-TOF)  $m/z$   $[M+H]^+$  calcd for  $C_{24}H_{21}F_2N_2O$  391.1622, found 391.1628.

1,1'-(2-([1,1'-biphenyl]-4-yl)-1-fluoroprop-2-ene-1,1-diyl)bis(2-(methoxymethyl)-1H-benzo[d]imidazole) (**12**)

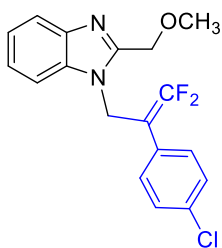

Compound (**12**) was isolated as yellow liquid after flash chromatography (petroleum ether/EtOAc = 10:5), 94 mg, 89% yield,  $R_f$ =0.32.  $^1H$  NMR (600 MHz,  $CDCl_3$ )  $\delta$  7.73 – 7.70 (m, 1H), 7.28 – 7.24 (m, 4H), 7.14 – 7.12 (m, 1H), 7.10 – 7.08 (m, 2H), 4.83 (dd,  $J$  = 14.9, 4.5 Hz, 1H), 4.68 (dd,  $J$  = 14.9, 9.2 Hz, 1H), 4.47 (d,  $J$  = 13.0 Hz, 1H), 4.19 (d,  $J$  = 13.0 Hz, 1H), 3.33 (s, 3H).  $^{13}C$  NMR (151 MHz,  $CDCl_3$ )  $\delta$  150.1, 142.1, 135.2, 134.9, 130.8, 123.0 (d,  $J$  = 130.9 Hz), 126.5, 124.7, 123.4, 122.6, 120.3, 109.1, 67.2, 58.3, 49.7 (d,  $J$  = 26.8 Hz), 49.7 (d,  $J$  = 26.8 Hz).  $^{19}F$  NMR (565 MHz,  $CDCl_3$ )  $\delta$  -145.57. HRMS (ESI-TOF)  $m/z$   $[M + H]^+$  calcd for  $C_{18}H_{16}ClF_2N_2O_2$  349.0919, found 349.0916.

## 9. References:

1. H. Qin, Y. Miao, J. Xu and Q. Bi, A Facile and Efficient [4+2] Annulation Reaction of Sulfur Ylides: Access to N-Fused Benzimidazoles, *Org. Chem. Front.*, 2019, **2**, 205-208.
2. L.S. Cui, J.U. Kim, H. Nomura, H. Nakanotani and C. Adachi, Benzimidazobenzothiazole-Based Bipolar Hosts to Harvest Nearly All of the Excitons from Blue Delayed Fluorescence and Phosphorescent Organic Light-Emitting Diodes. *Angew. Chem. Int. Ed.*, 2016, **55**, 6864.
3. P.J. Xia, Z. Ye, Y. Hu, D. Song, H.Y. Xiang, X. Chen and H. Yang, Photocatalytic Phosphoranyl Radical-Mediated N–O Cleavage of Strained Cycloketone Oximes. *Org. Lett.* 2019, **8**, 2658-2662.

4. Y. Guo, Y. Cao, H. Song, Y. Liu and Q. Wang, Photoredox Relay-Catalyzed Gem-Difluoroallylation of Alkyl Iodides, *Chem. Comm.*, 2021, **76**, 9768-9771.

# 10. $^1\text{H}$ NMR, $^{13}\text{C}$ NMR and $^{19}\text{F}$ NMR spectra of all products

$^1\text{H}$  NMR spectrum of product **3a** in  $\text{CDCl}_3$  (600 MHz)

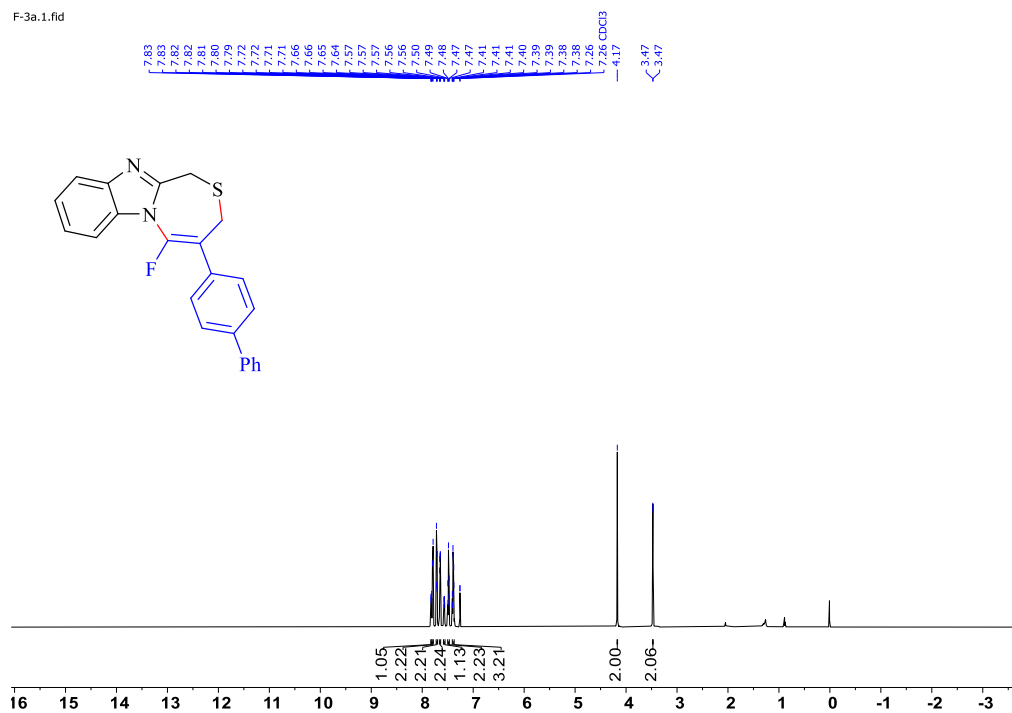

$^{13}\text{C}$  NMR spectrum of product **3a** in  $\text{CDCl}_3$  (151 MHz)

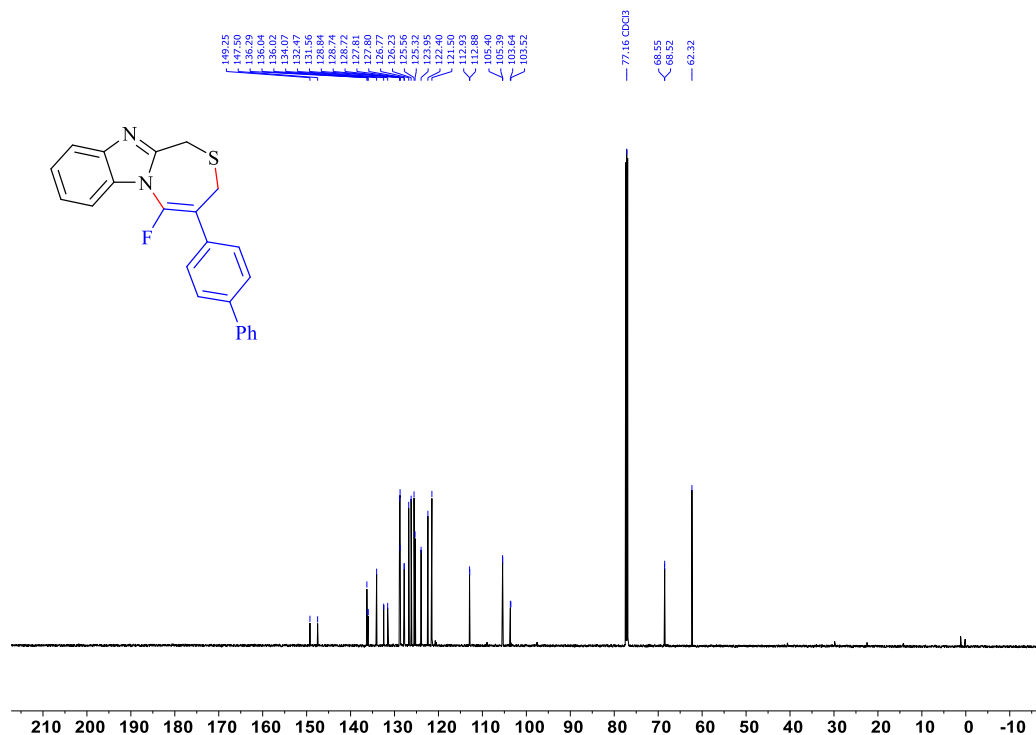



$^{19}\text{F}$ -NMR spectrum of product **3a** in  $\text{CDCl}_3$  (565 MHz)

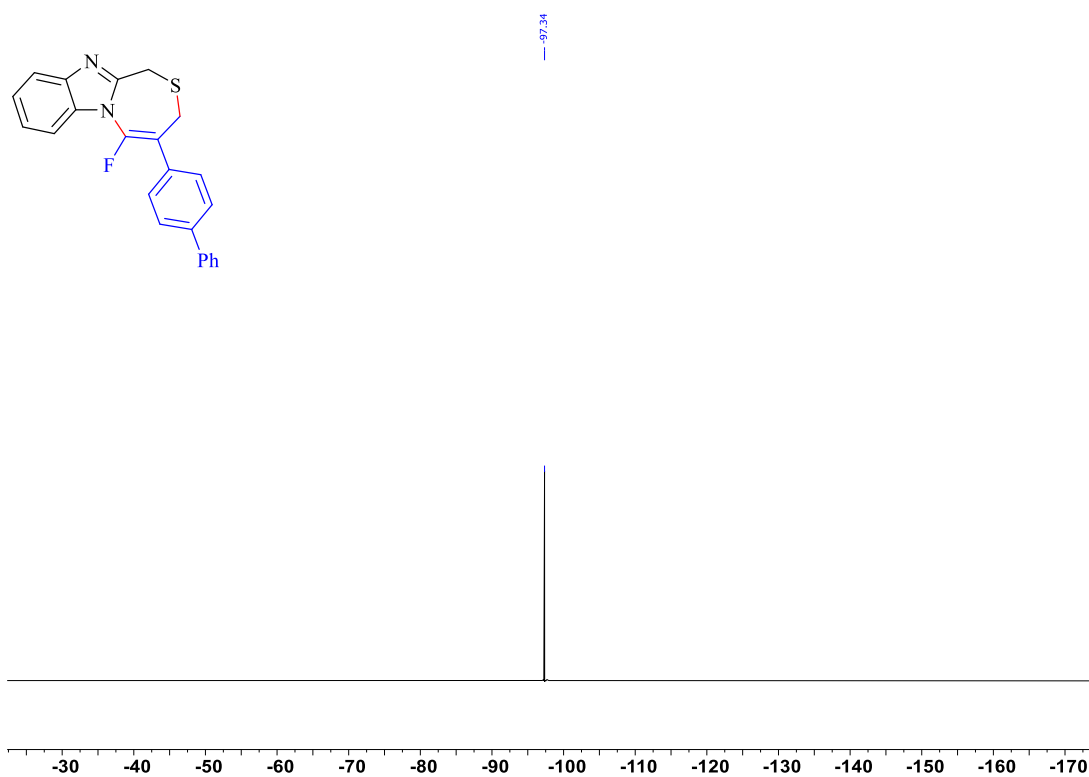

$^1\text{H}$  NMR spectrum of product **3b** in  $\text{CDCl}_3$  (600 MHz)

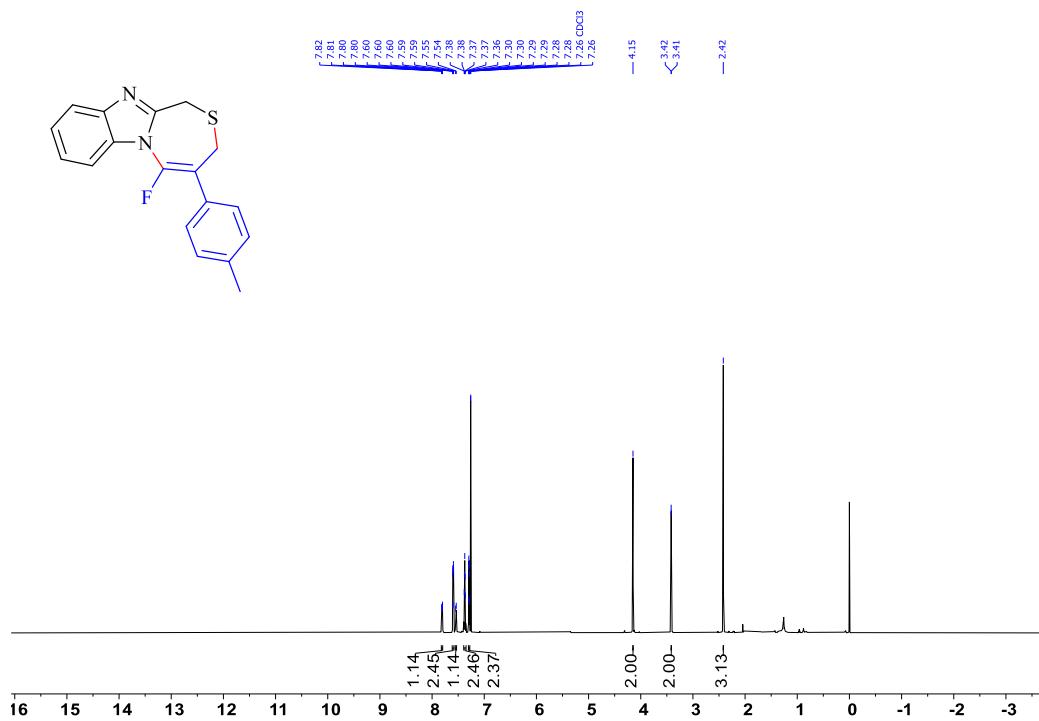

$^{13}\text{C}$  NMR spectrum of product **3b** in  $\text{CDCl}_3$  (151 MHz)

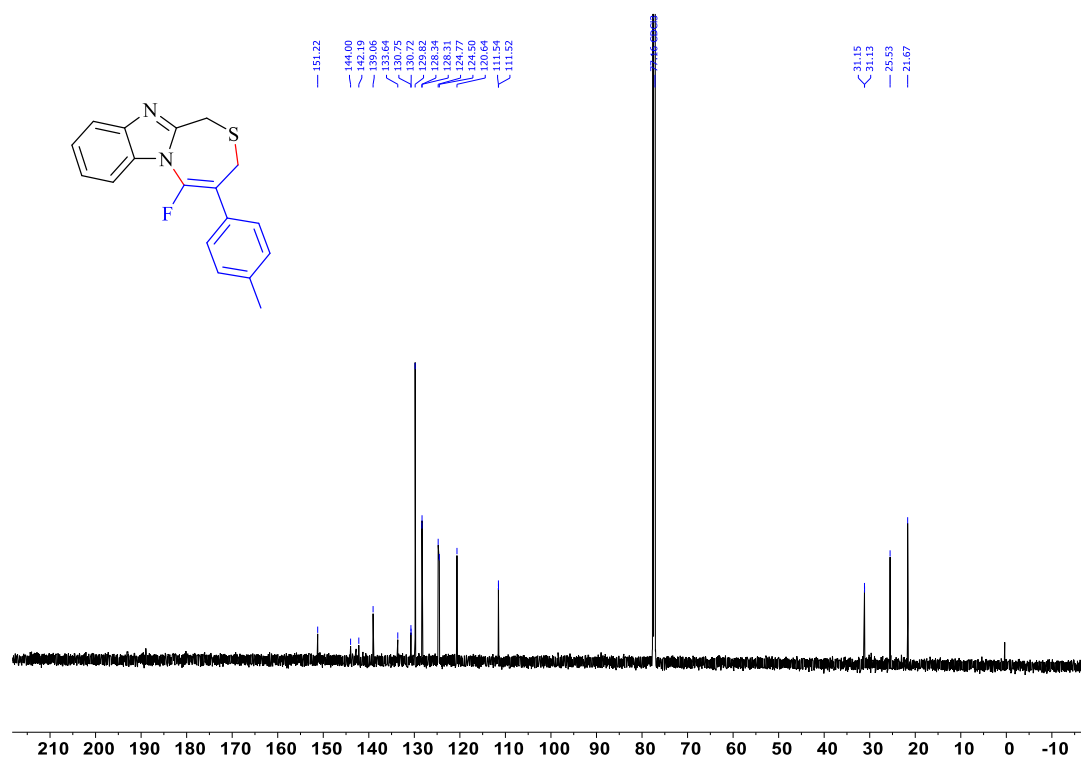

$^{19}\text{F}$ -NMR spectrum of product **3b** in  $\text{CDCl}_3$  (565 MHz)

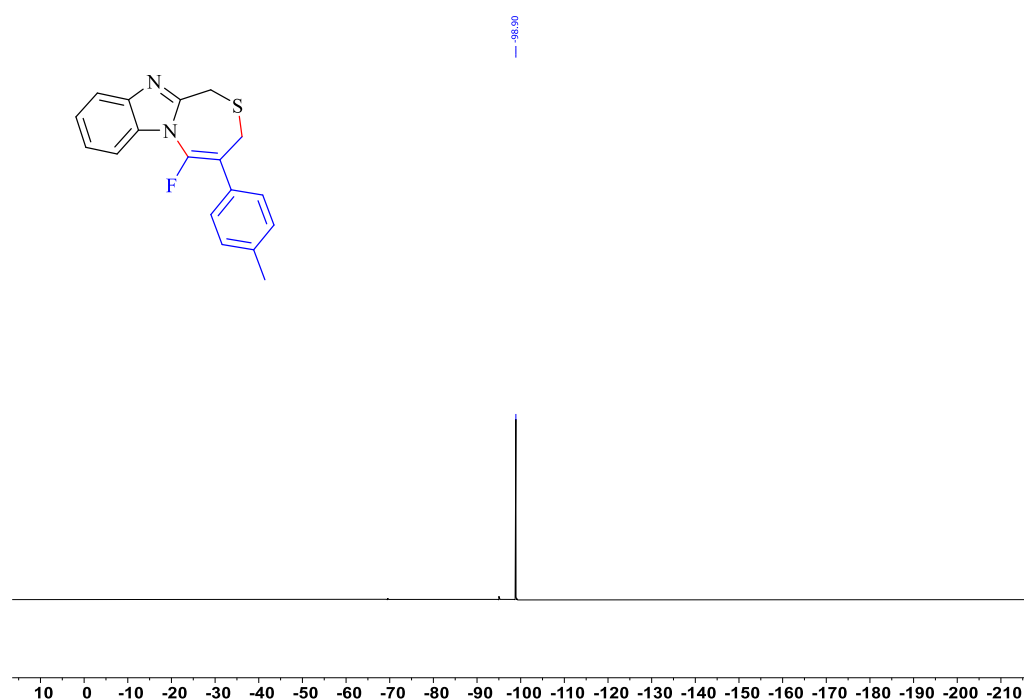

$^1\text{H}$  NMR spectrum of product **3c** in  $\text{CDCl}_3$  (400 MHz)

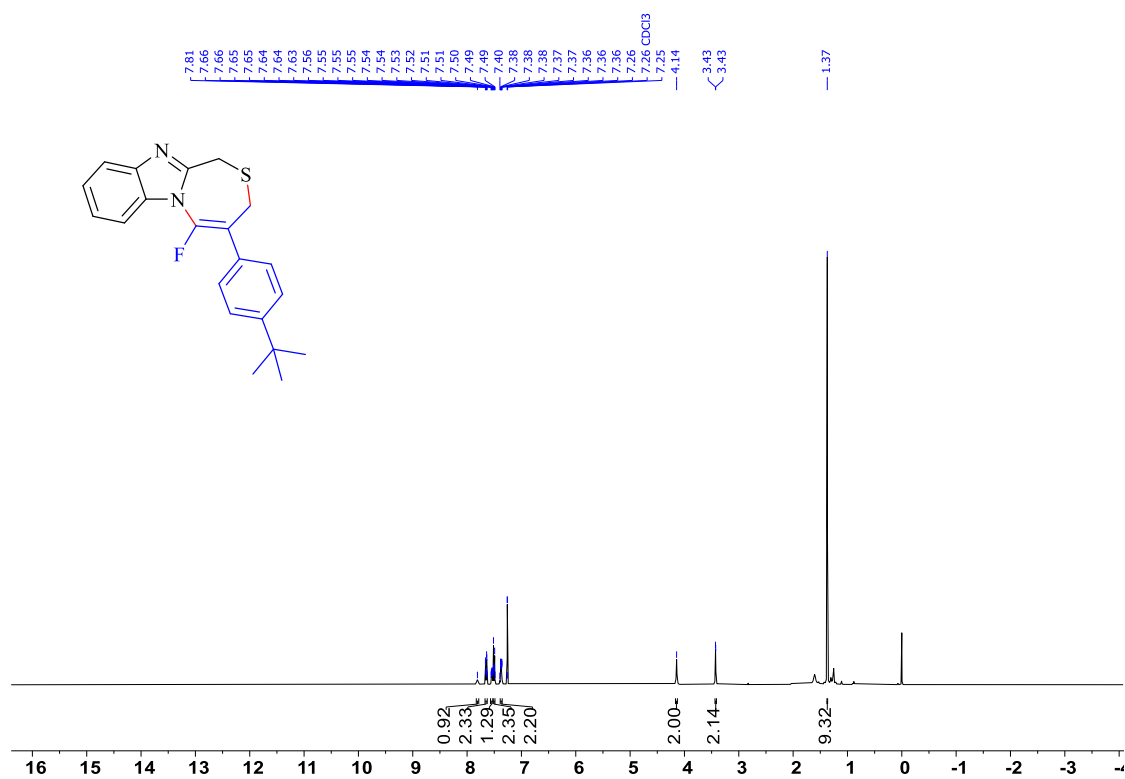

$^{13}\text{C}$  NMR spectrum of product **3c** in  $\text{CDCl}_3$  (151 MHz)

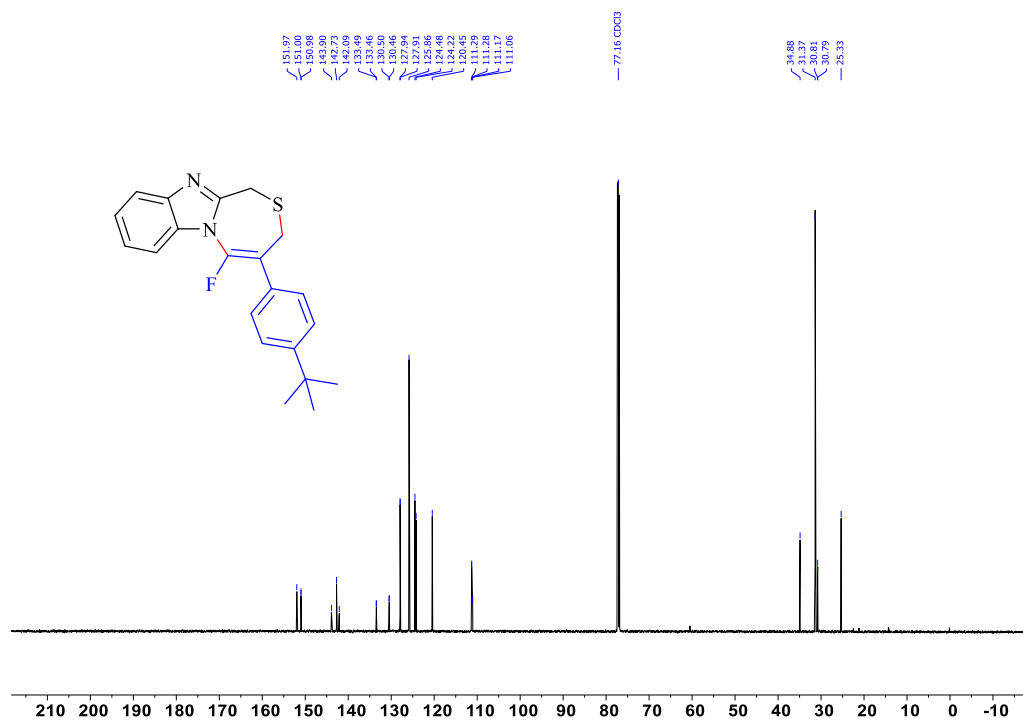

$^{19}\text{F}$ -NMR spectrum of product **3c** in  $\text{CDCl}_3$  (565 MHz)

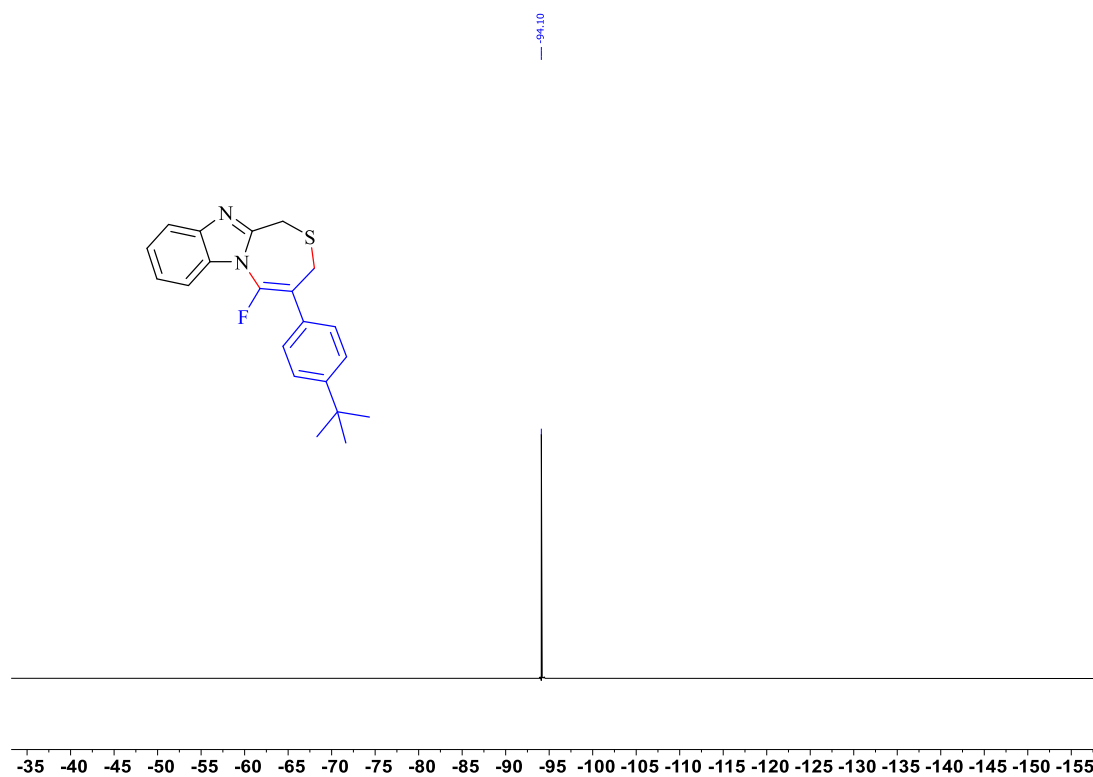

$^1\text{H}$  NMR spectrum of product **3d** in  $\text{CDCl}_3$  (600 MHz)

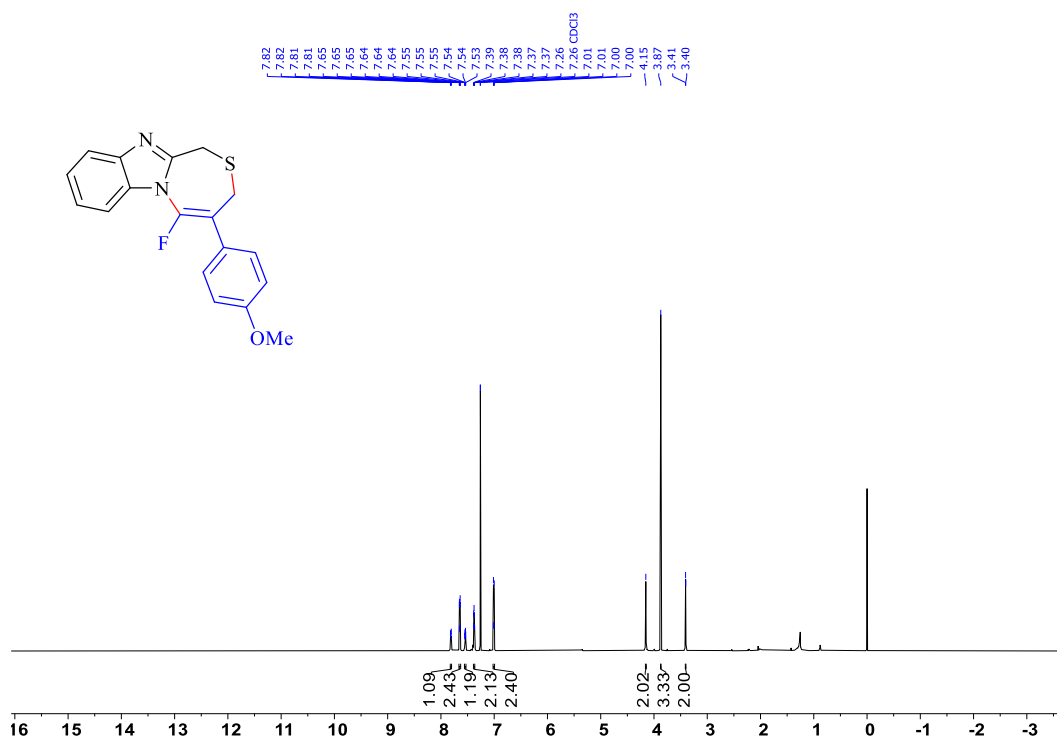

$^{13}\text{C}$  NMR spectrum of product **3d** in  $\text{CDCl}_3$  (151 MHz)

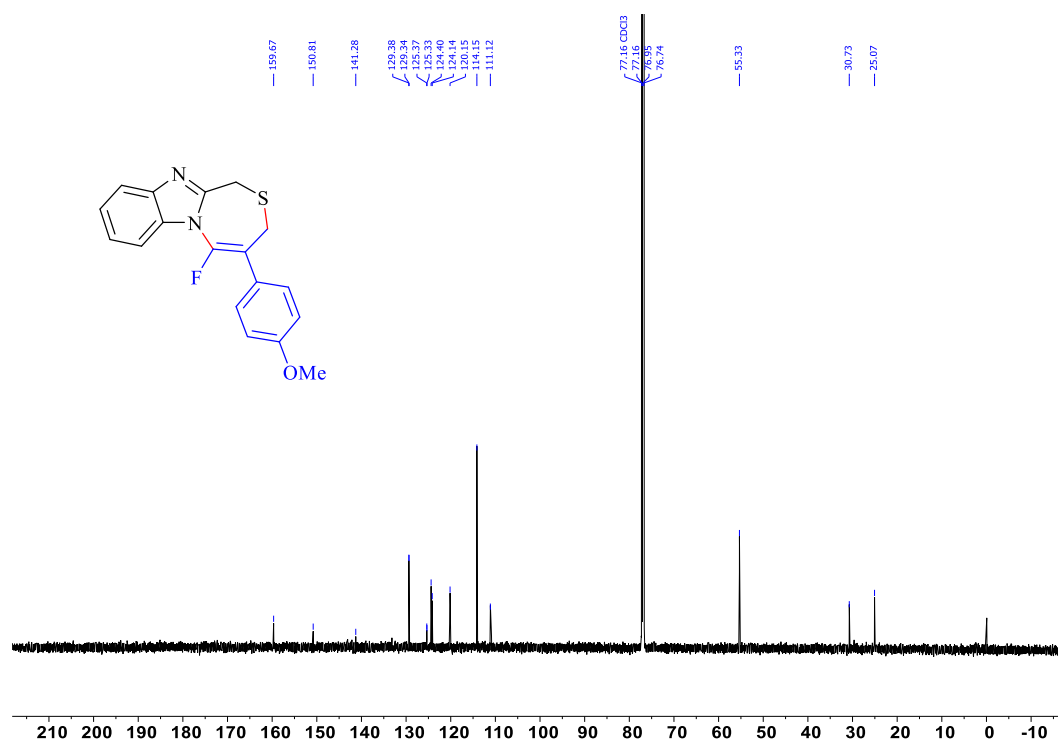

$^{19}\text{F}$ -NMR spectrum of product **3d** in  $\text{CDCl}_3$  (565 MHz)

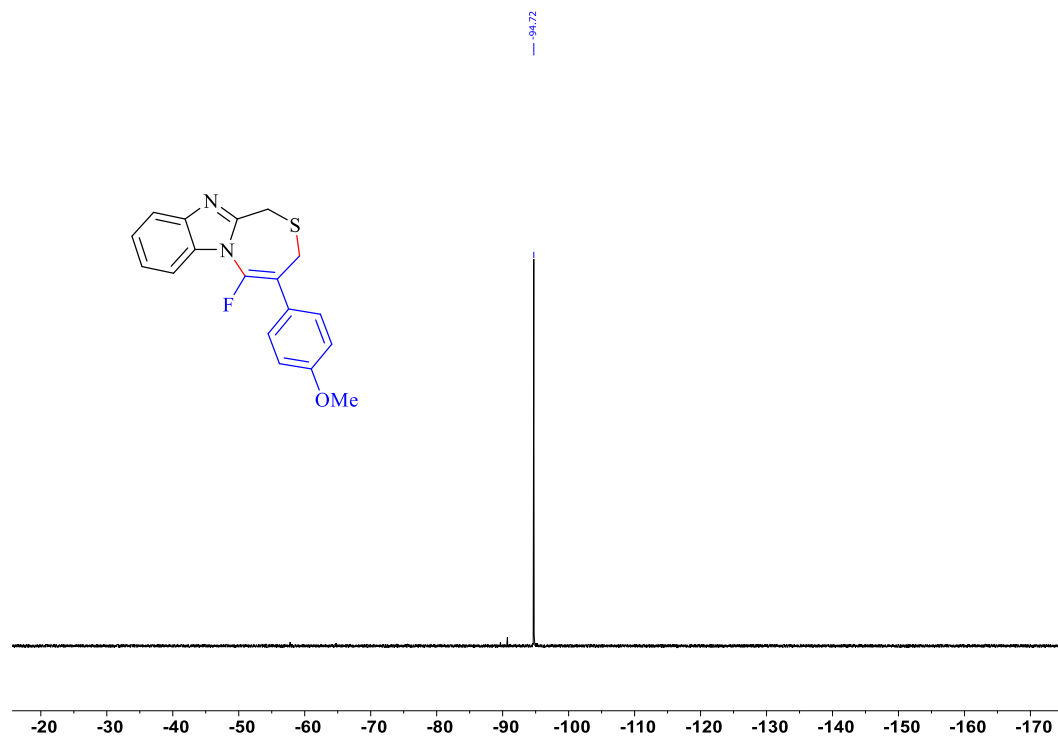

$^1\text{H}$  NMR spectrum of product **3e** in  $\text{CDCl}_3$  (600 MHz)

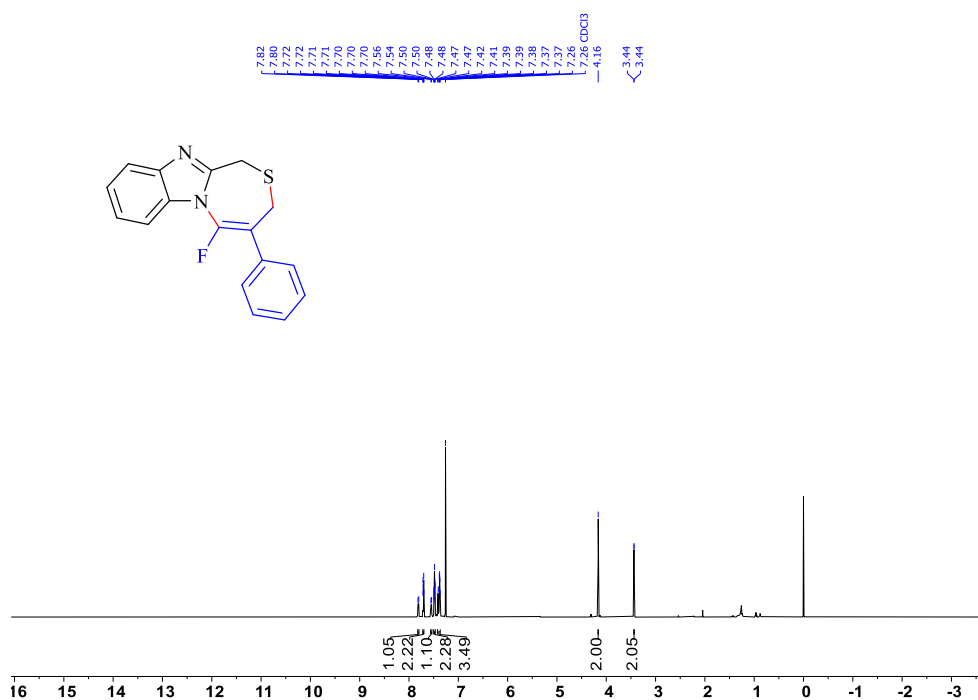

$^{13}\text{C}$  NMR spectrum of product **3e** in  $\text{CDCl}_3$  (151 MHz)

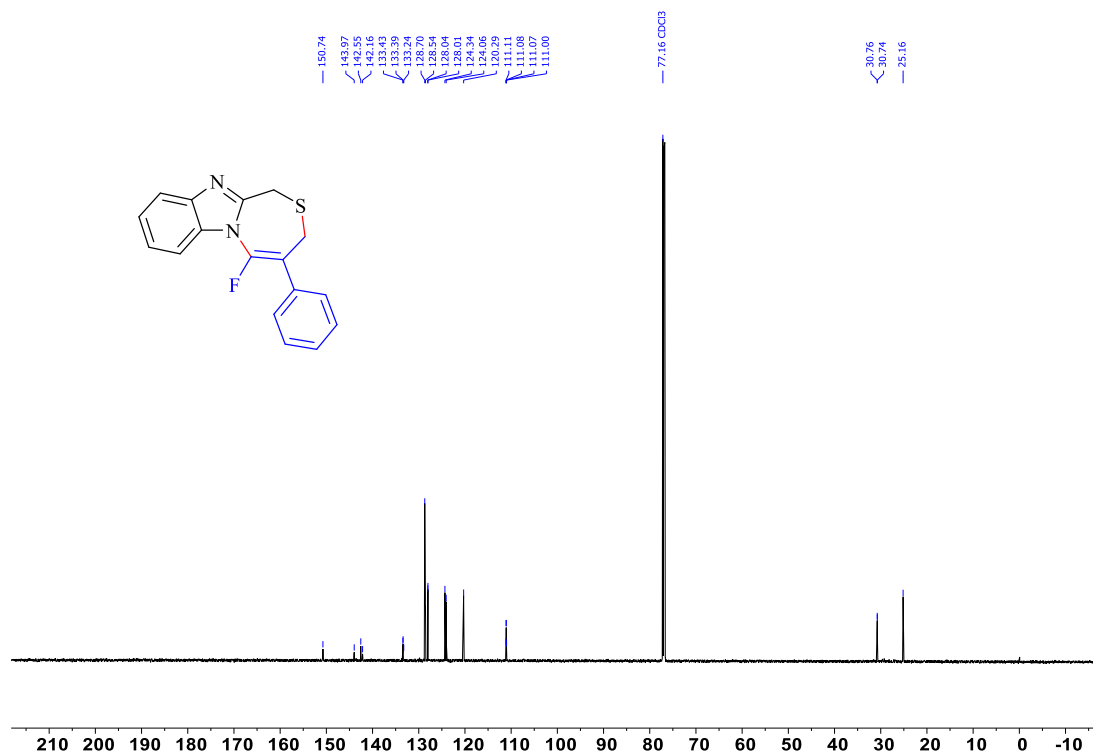

$^{19}\text{F}$ -NMR spectrum of product **3e** in  $\text{CDCl}_3$  (565 MHz)

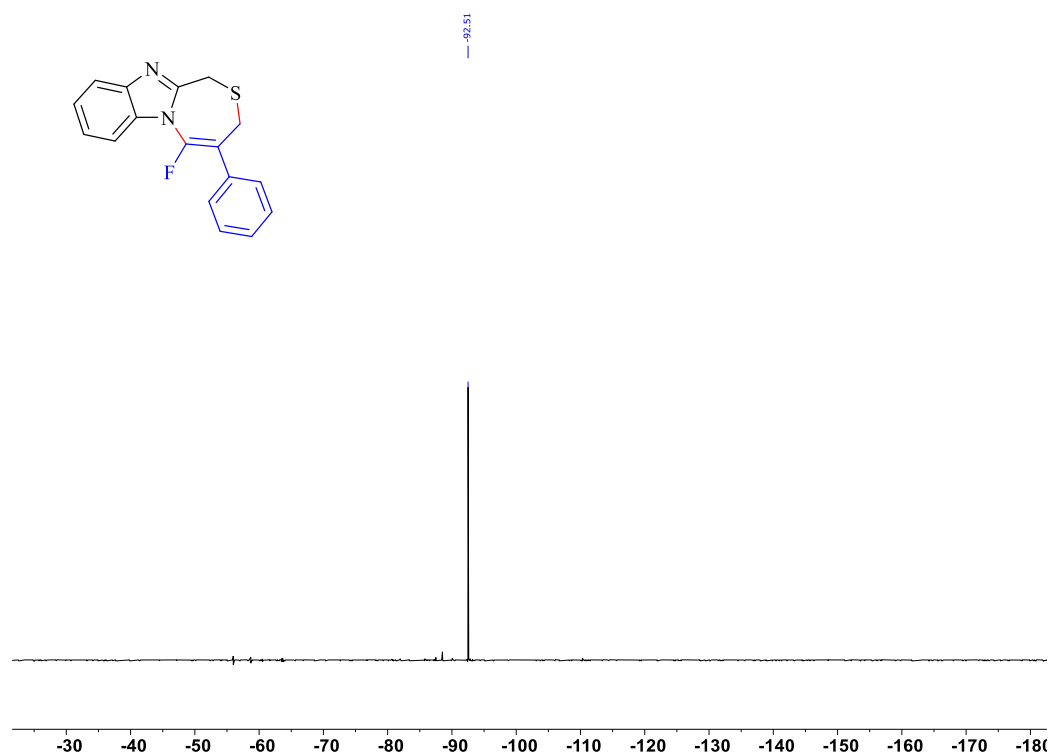

$^1\text{H}$  NMR spectrum of product **3f** in  $\text{CDCl}_3$  (400 MHz)

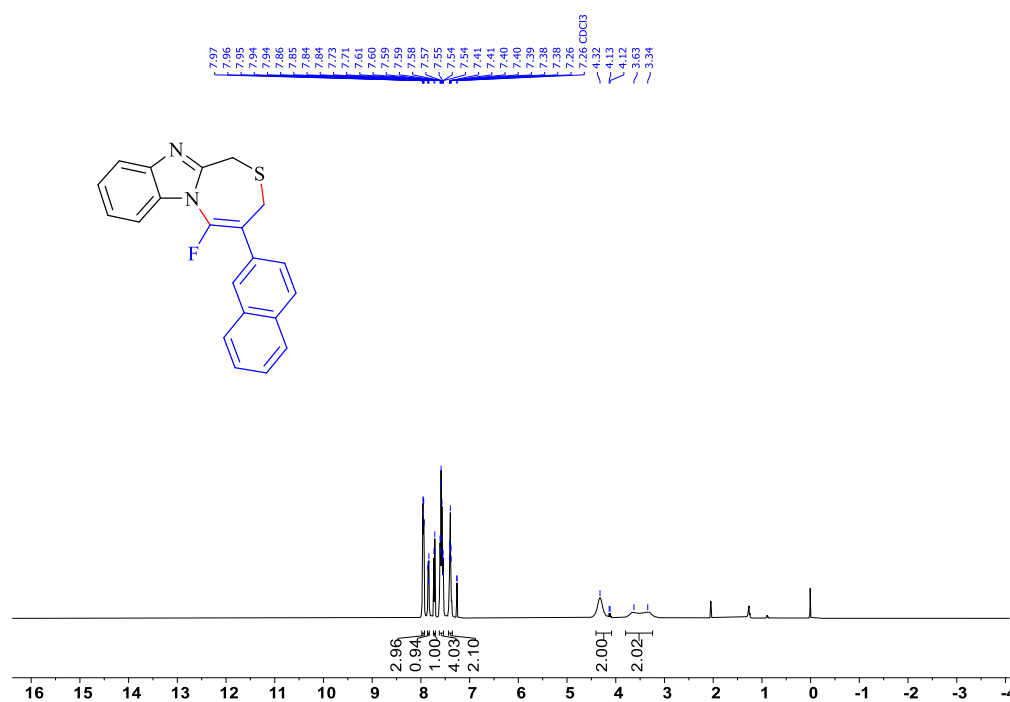

$^{13}\text{C}$  NMR spectrum of product **3f** in  $\text{CDCl}_3$  (101 MHz)

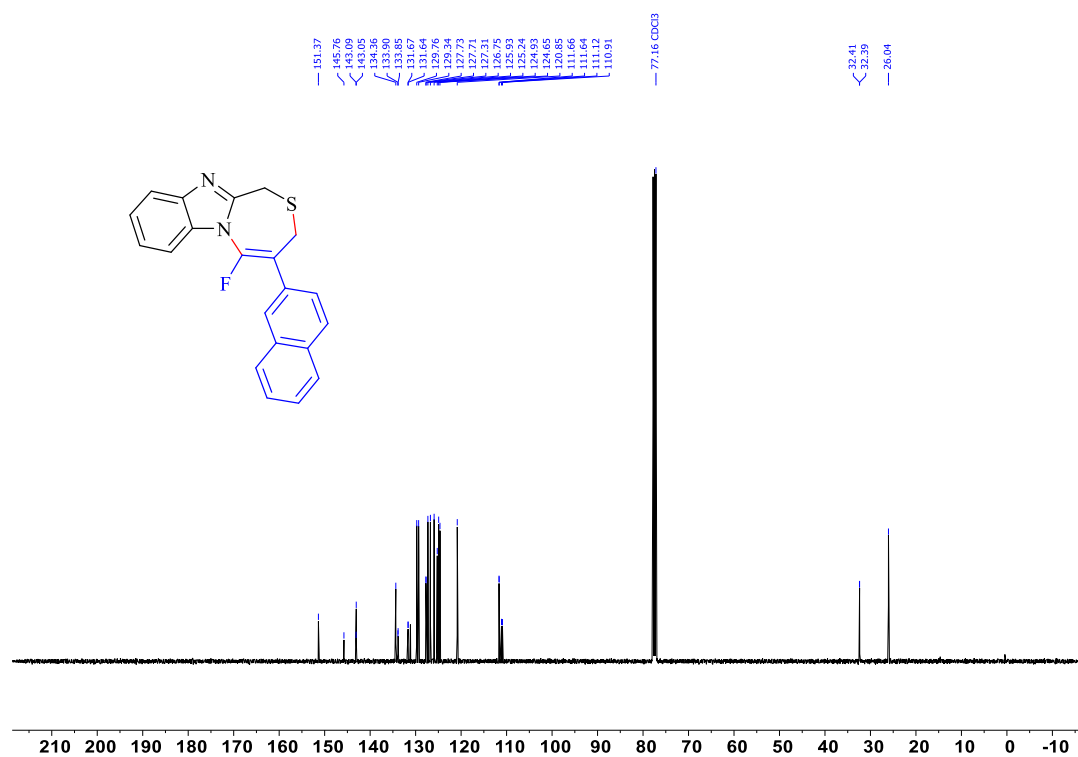

$^{19}\text{F}$ -NMR spectrum of product **3f** in  $\text{CDCl}_3$  (377 MHz)

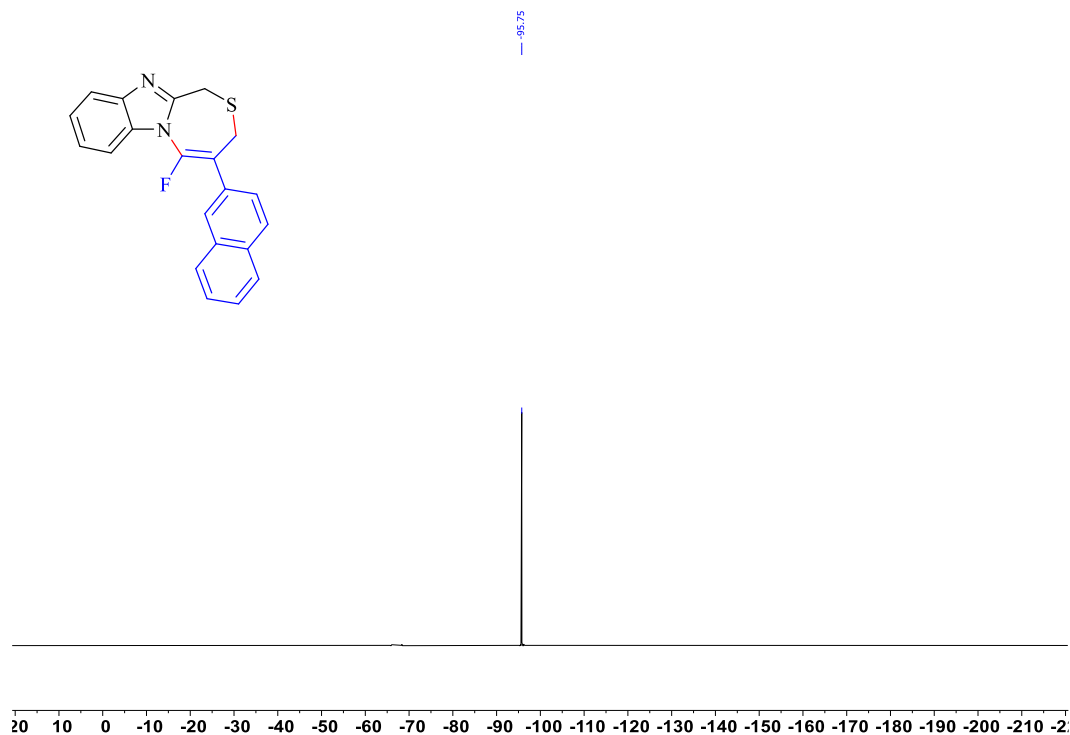



## F-3j.1.fid

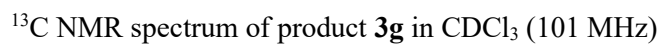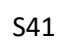

$^{19}\text{F}$ -NMR spectrum of product **3g** in  $\text{CDCl}_3$  (377 MHz)

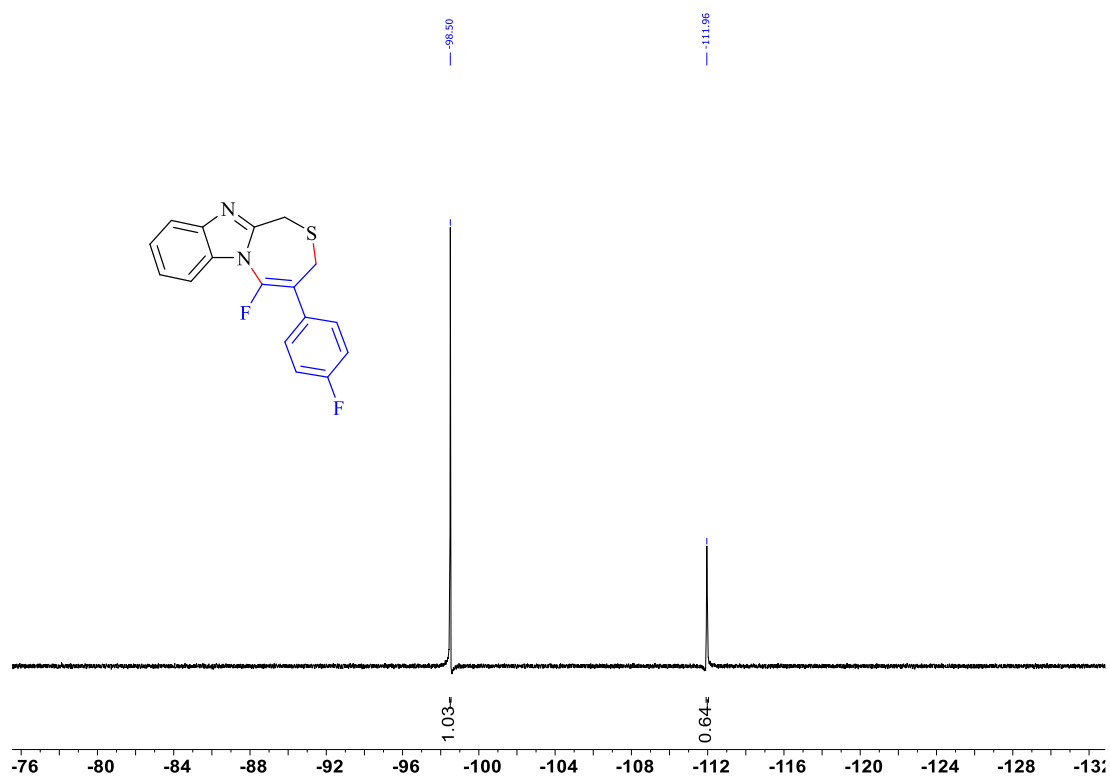

$^1\text{H}$  NMR spectrum of product **3h** in  $\text{CDCl}_3$  (400 MHz)

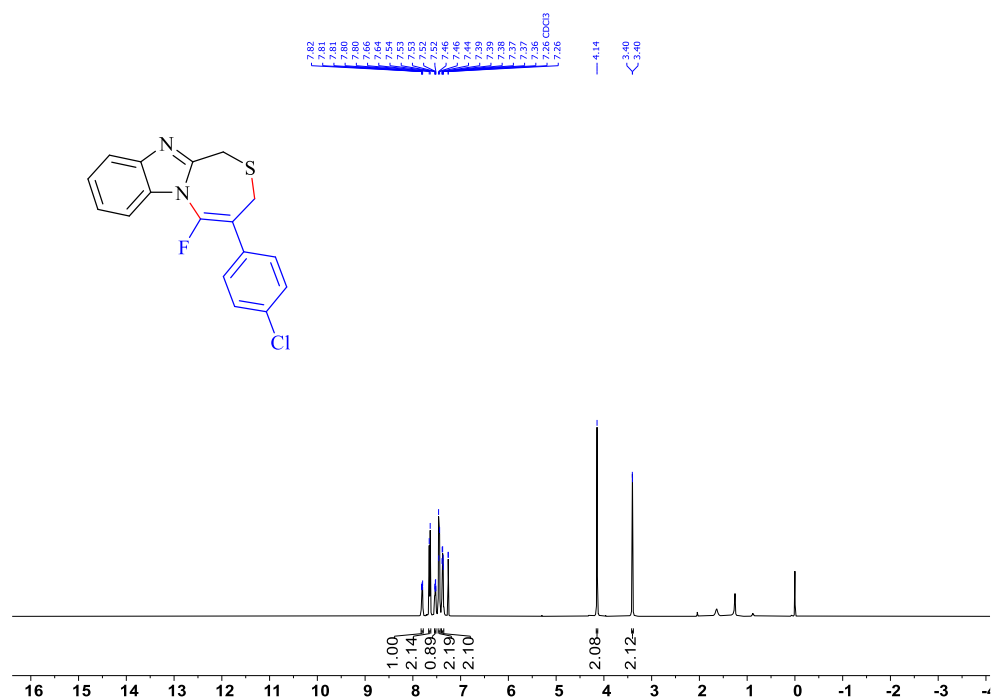

$^{13}\text{C}$  NMR spectrum of product **3h** in  $\text{CDCl}_3$  (101 MHz)

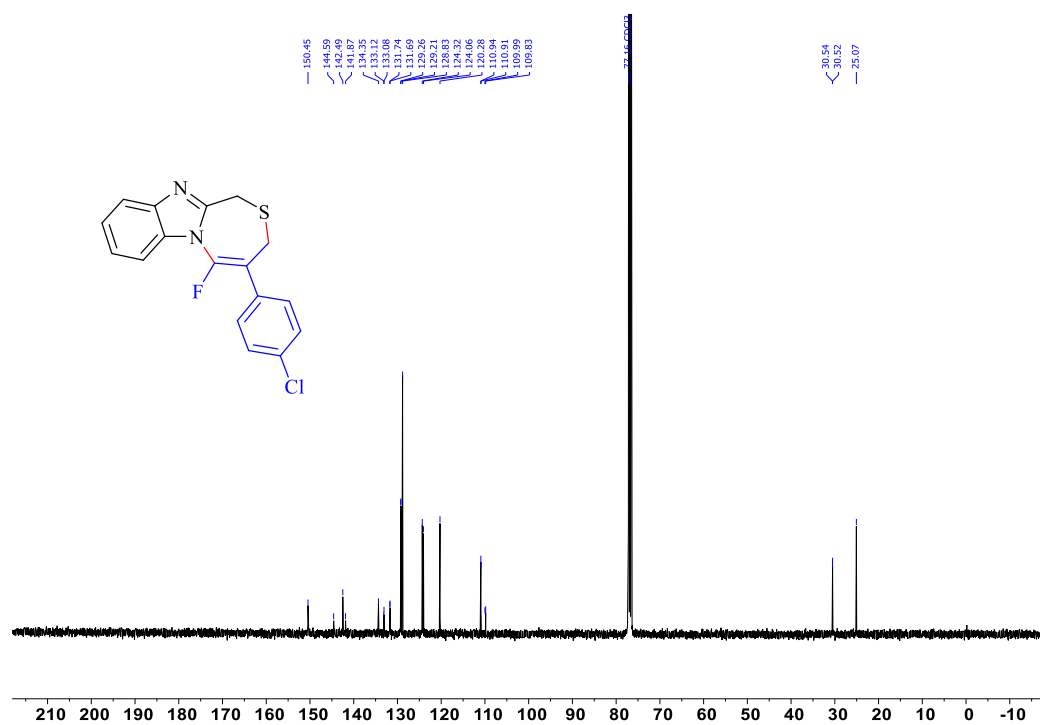

$^{19}\text{F}$ -NMR spectrum of product **3h** in  $\text{CDCl}_3$  (377 MHz)

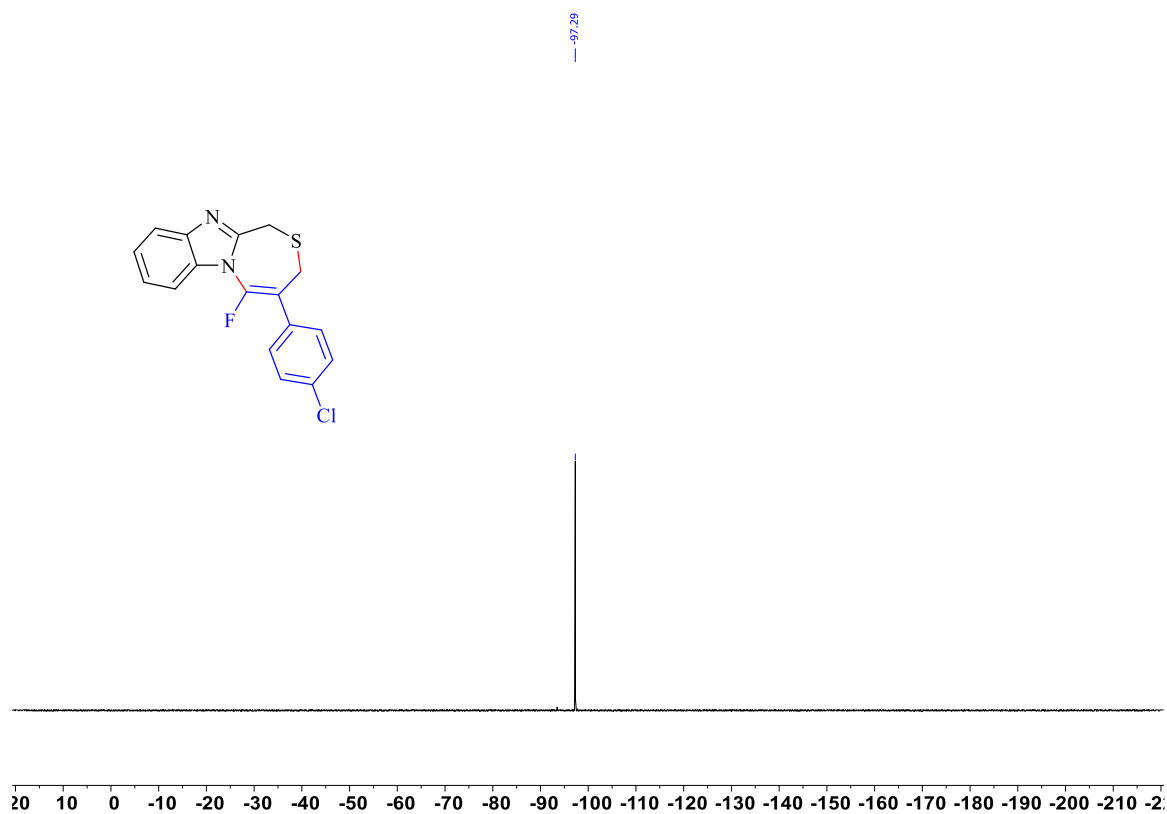

Chemical structure: FC1=CC=C(C=C1)C2=CN(C2Sc3ccccc3)F

<sup>1</sup>H NMR spectrum (CDCl<sub>3</sub>) showing peaks in the aromatic region (7.26-7.84 ppm), a singlet for the fluorine atom (4.17 ppm), and a singlet for the trifluoromethyl group (3.44 ppm). Integration values are provided below the baseline.

| Chemical Shift (ppm) | Integration |
|----------------------|-------------|
| 7.84                 | 3.26        |
| 7.83                 | 2.19        |
| 7.82                 | 1.06        |
| 7.81                 | 2.23        |
| 7.80                 |             |
| 7.79                 |             |
| 7.78                 |             |
| 7.77                 |             |
| 7.76                 |             |
| 7.75                 |             |
| 7.74                 |             |
| 7.73                 |             |
| 7.72                 |             |
| 7.71                 |             |
| 7.70                 |             |
| 7.69                 |             |
| 7.68                 |             |
| 7.67                 |             |
| 7.66                 |             |
| 7.65                 |             |
| 7.64                 |             |
| 7.63                 |             |
| 7.62                 |             |
| 7.61                 |             |
| 7.60                 |             |
| 7.59                 |             |
| 7.58                 |             |
| 7.57                 |             |
| 7.56                 |             |
| 7.55                 |             |
| 7.54                 |             |
| 7.53                 |             |
| 7.52                 |             |
| 7.51                 |             |
| 7.50                 |             |
| 7.49                 |             |
| 7.48                 |             |
| 7.47                 |             |
| 7.46                 |             |
| 7.45                 |             |
| 7.44                 |             |
| 7.43                 |             |
| 7.42                 |             |
| 7.41                 |             |
| 7.40                 |             |
| 7.39                 |             |
| 7.38                 |             |
| 7.37                 |             |
| 7.36                 |             |
| 7.35                 |             |
| 7.34                 |             |
| 7.33                 |             |
| 7.32                 |             |
| 7.31                 |             |
| 7.30                 |             |
| 7.29                 |             |
| 7.28                 |             |
| 7.27                 |             |
| 7.26                 |             |
| 4.17                 | 2.12        |
| 3.44                 | 2.00        |

Chemical structure of 2-(4-(trifluoromethyl)phenyl)-2-fluoro-1,2,3,4-tetrahydro-1H-benzothiazine is shown above the spectrum.

<sup>13</sup>C NMR peaks (ppm):

- 150.85
- 150.84
- 150.82
- 143.57
- 142.94
- 137.53
- 137.52
- 133.55
- 131.00
- 130.79
- 130.78
- 128.81
- 126.11
- 126.09
- 126.08
- 126.04
- 125.12
- 124.98
- 124.97
- 120.63
- 111.49
- 111.47
- 111.45
- 110.24
- 77.16 (CDCl<sub>3</sub>)
- 31.01
- 30.99
- 25.60

$^{19}\text{F}$ -NMR spectrum of product **3i** in  $\text{CDCl}_3$  (565 MHz)

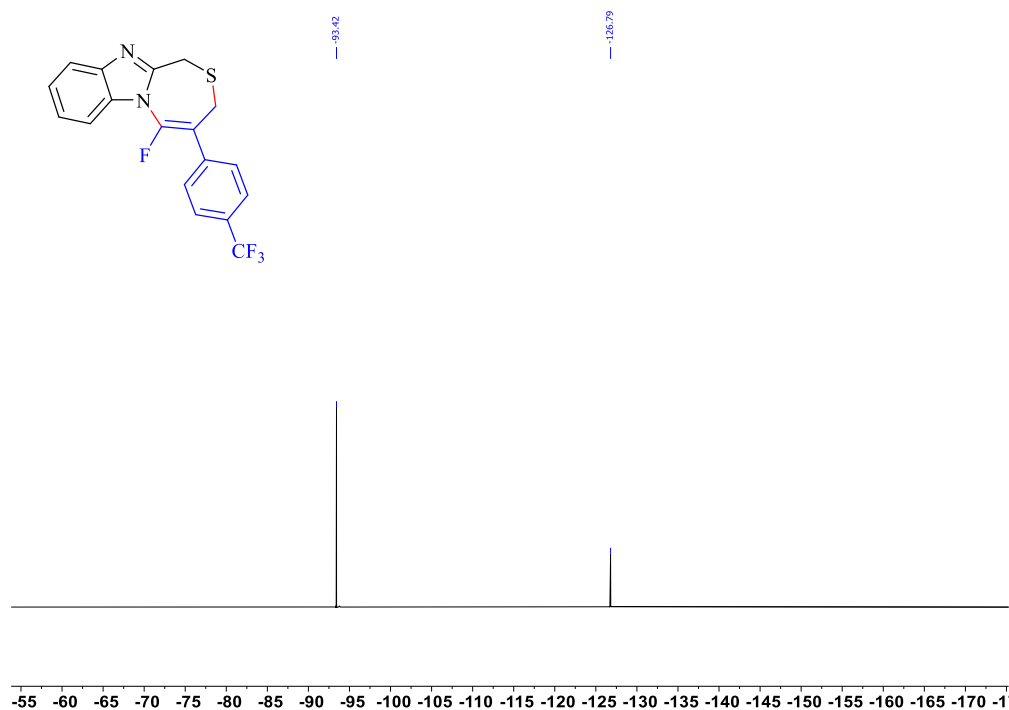

$^1\text{H}$  NMR spectrum of product **3j** in  $\text{CDCl}_3$  (400 MHz)

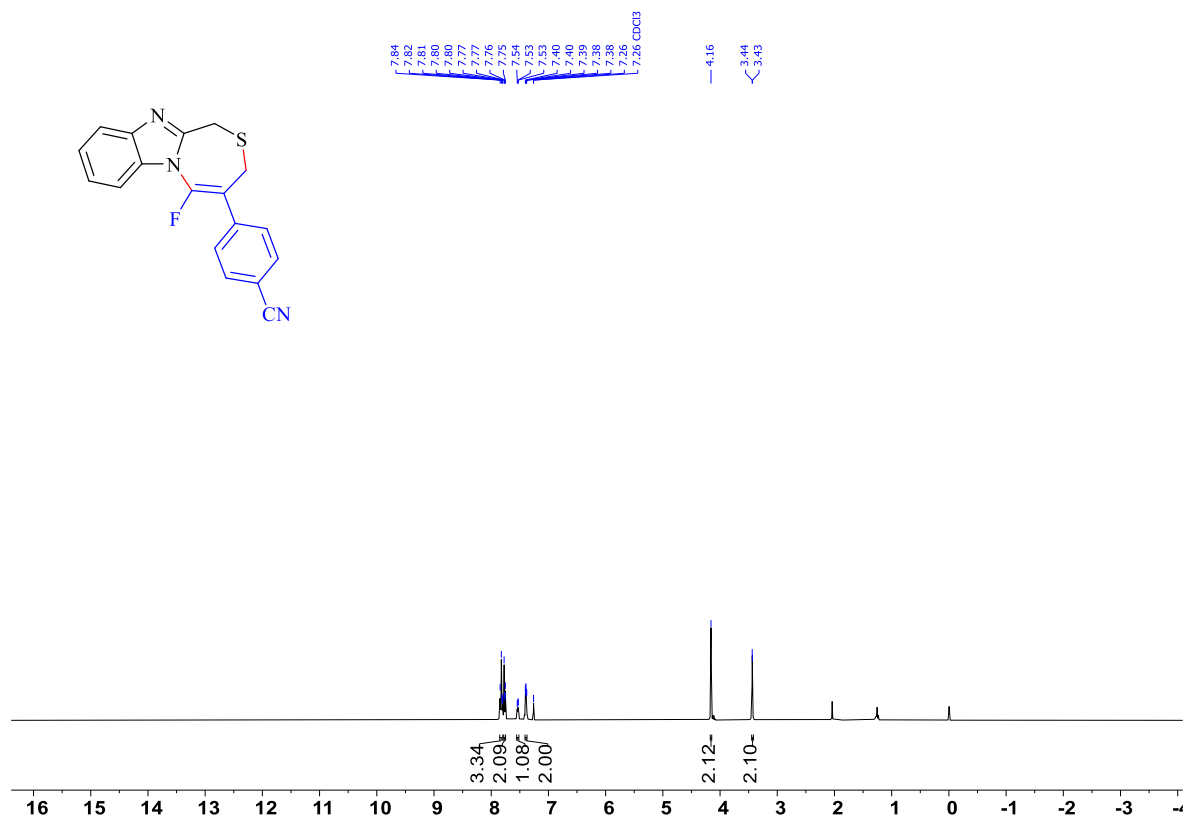

$^{13}\text{C}$  NMR spectrum of product **3j** in  $\text{CDCl}_3$  (101 MHz)

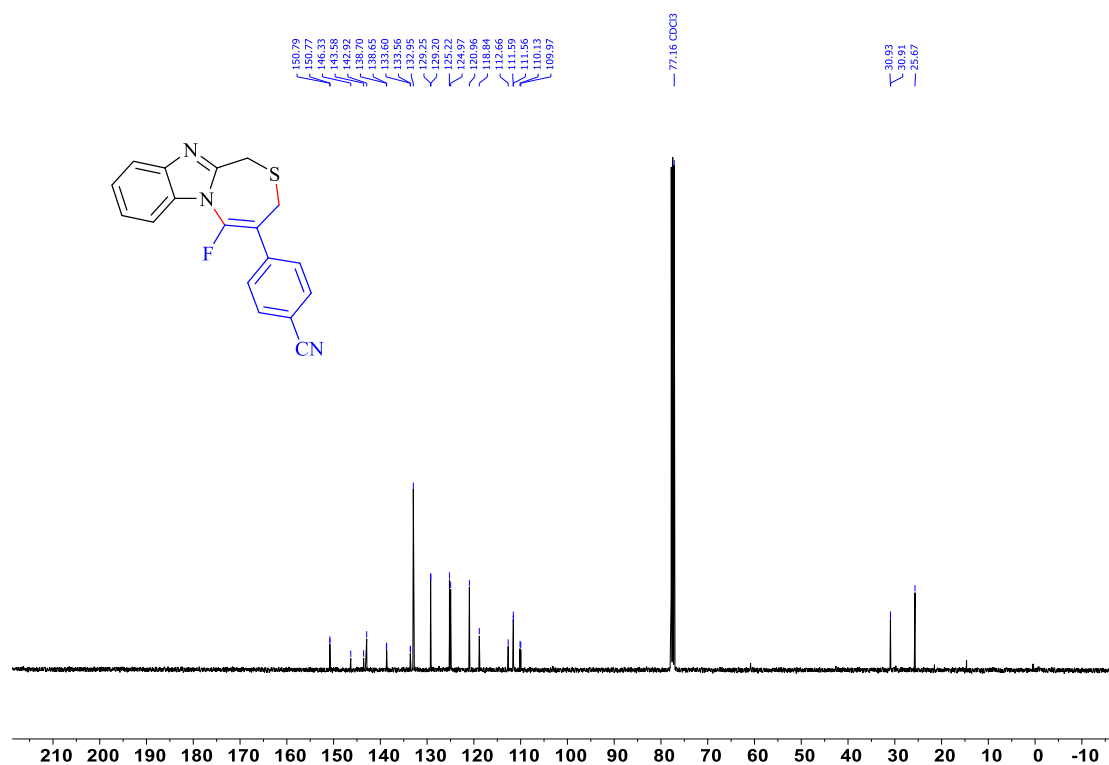

$^{19}\text{F}$ -NMR spectrum of product **3j** in  $\text{CDCl}_3$  (377 MHz)

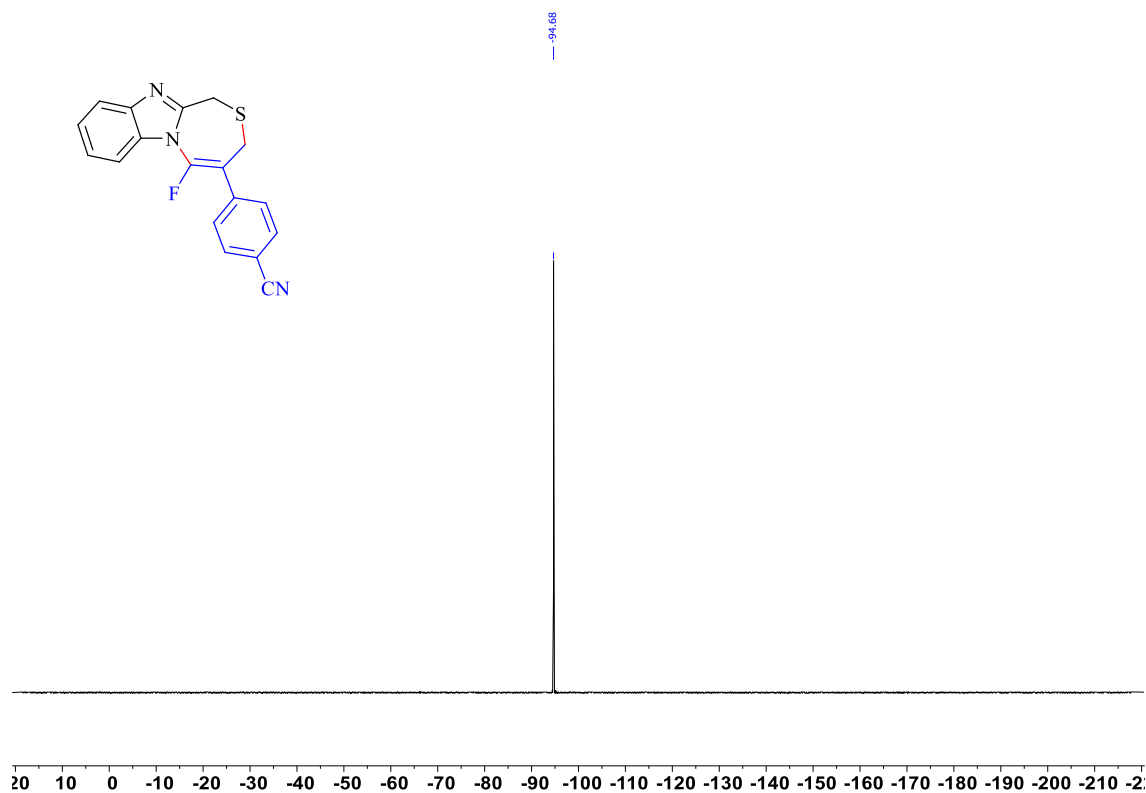

$^1\text{H}$  NMR spectrum of product **3k** in  $\text{CDCl}_3$  (600 MHz)

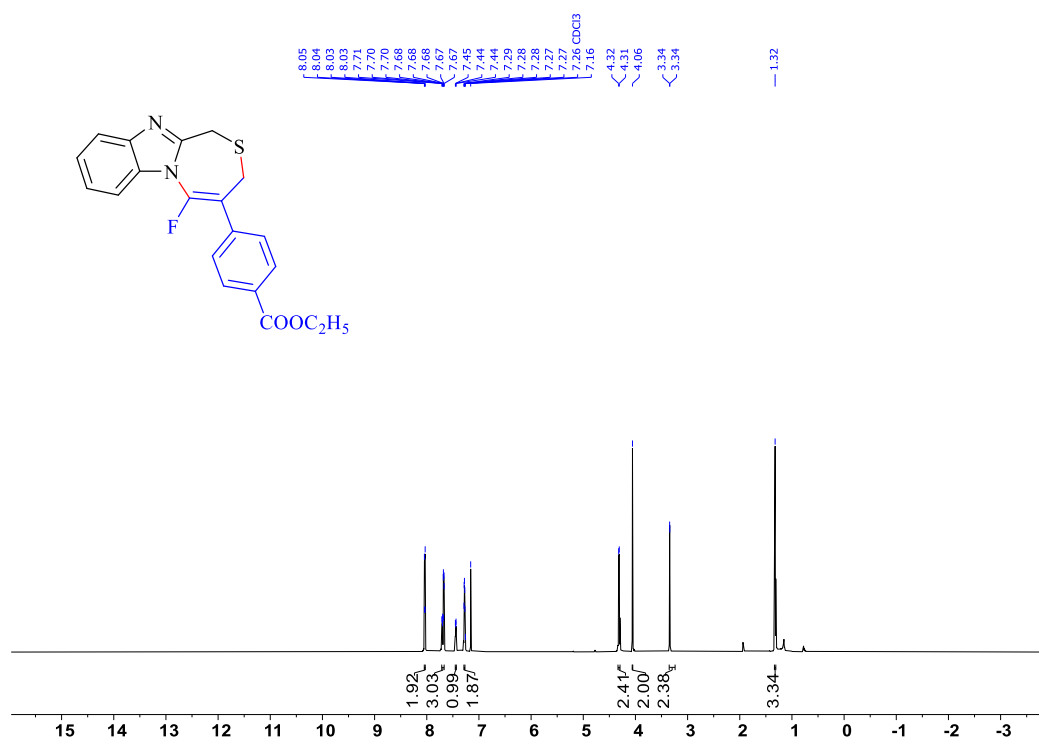

$^{13}\text{C}$  NMR spectrum of product **3k** in  $\text{CDCl}_3$  (101 MHz)

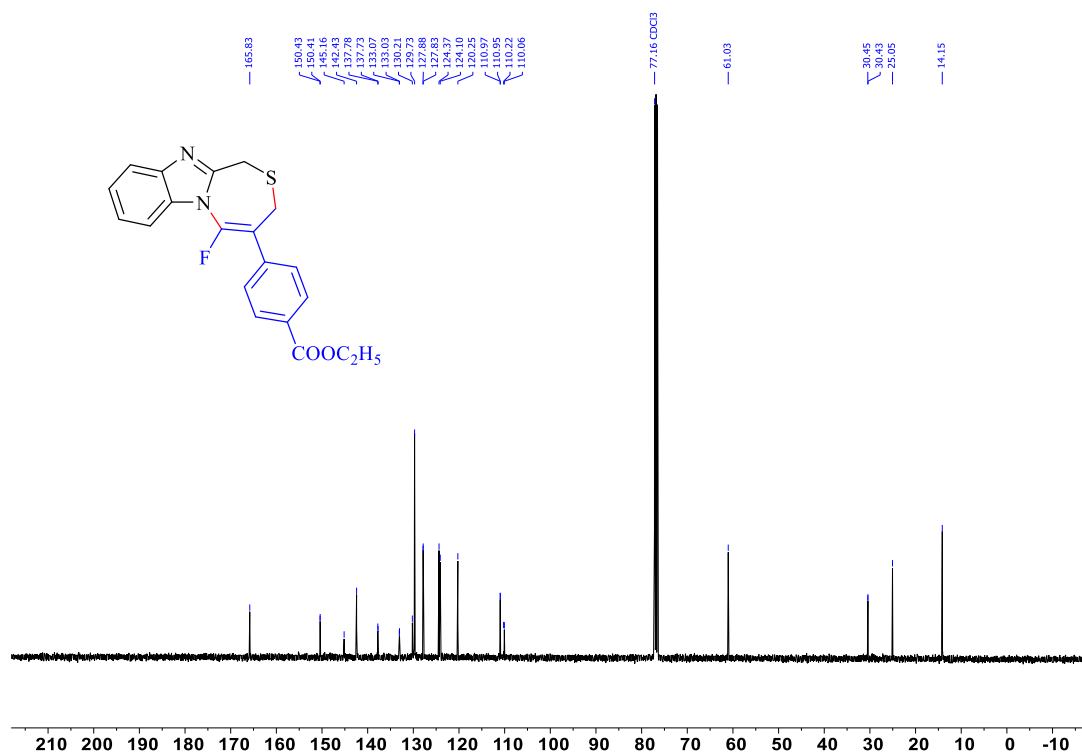

$^{19}\text{F}$ -NMR spectrum of product **3k** in  $\text{CDCl}_3$  (377 MHz)

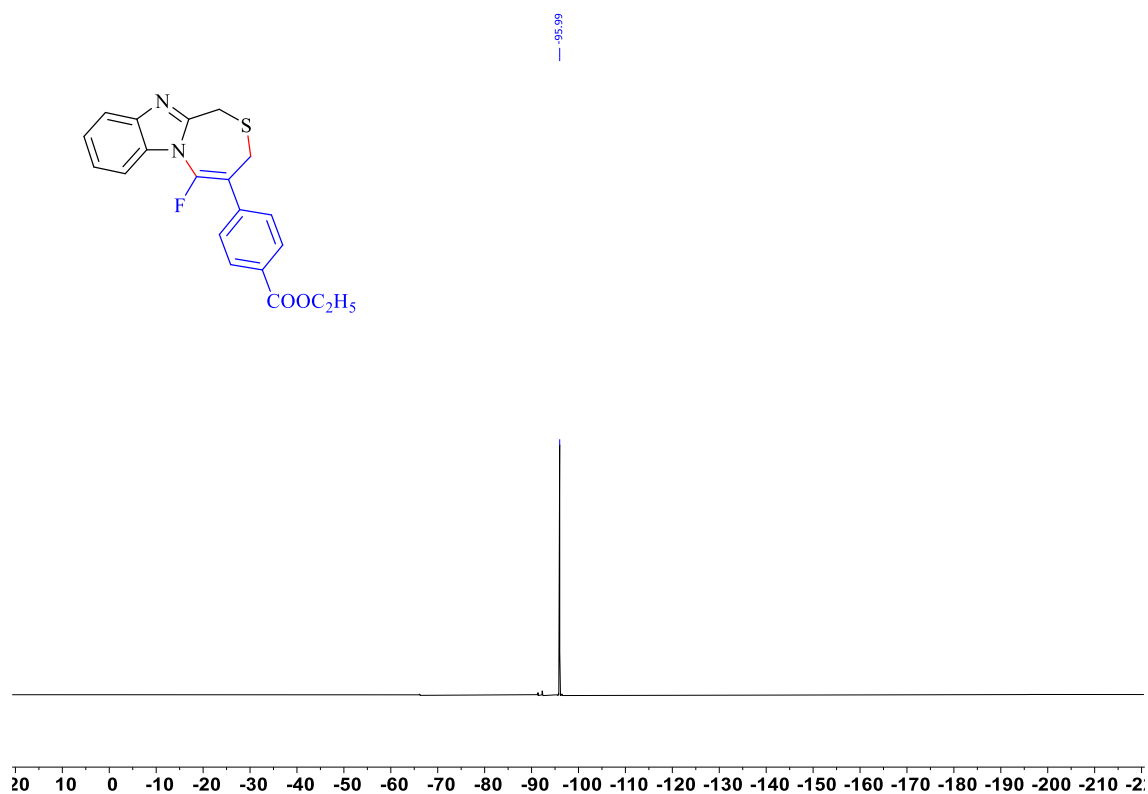

$^1\text{H}$  NMR spectrum of product **3l** in  $\text{CDCl}_3$  (600 MHz)

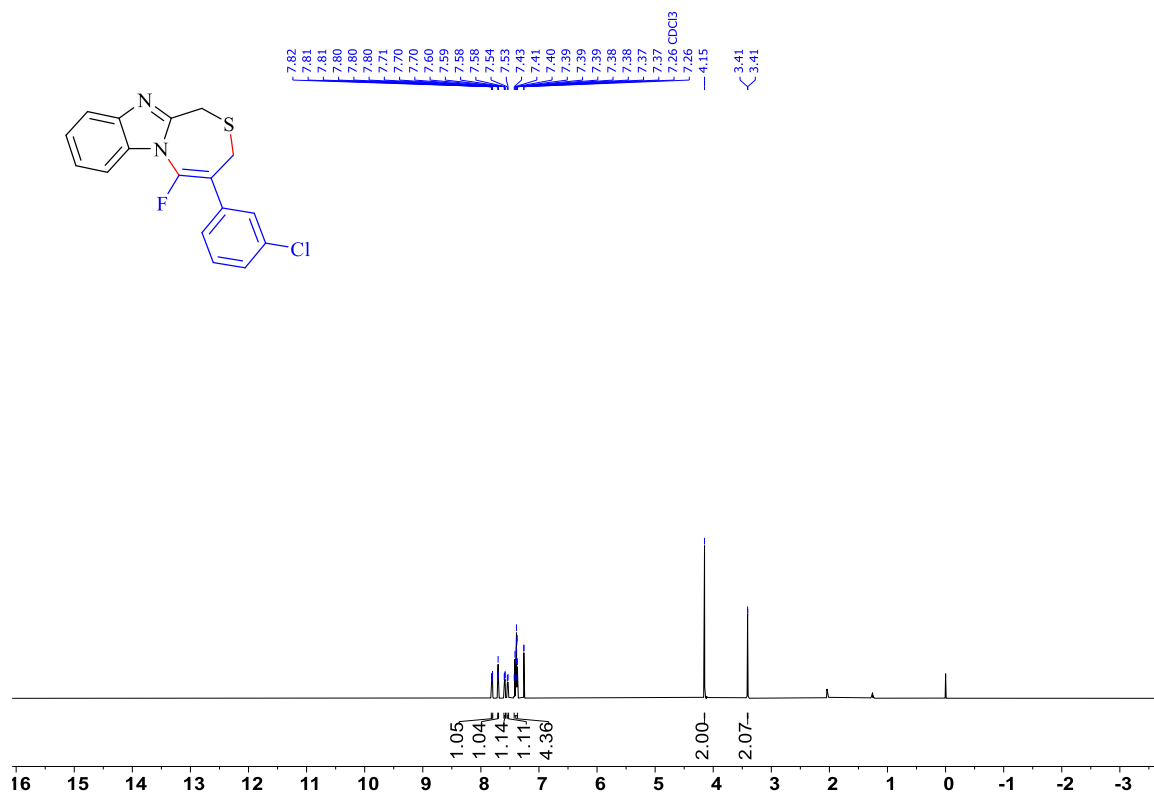



$^{13}\text{C}$  NMR spectrum of product **31** in  $\text{CDCl}_3$  (151 MHz)

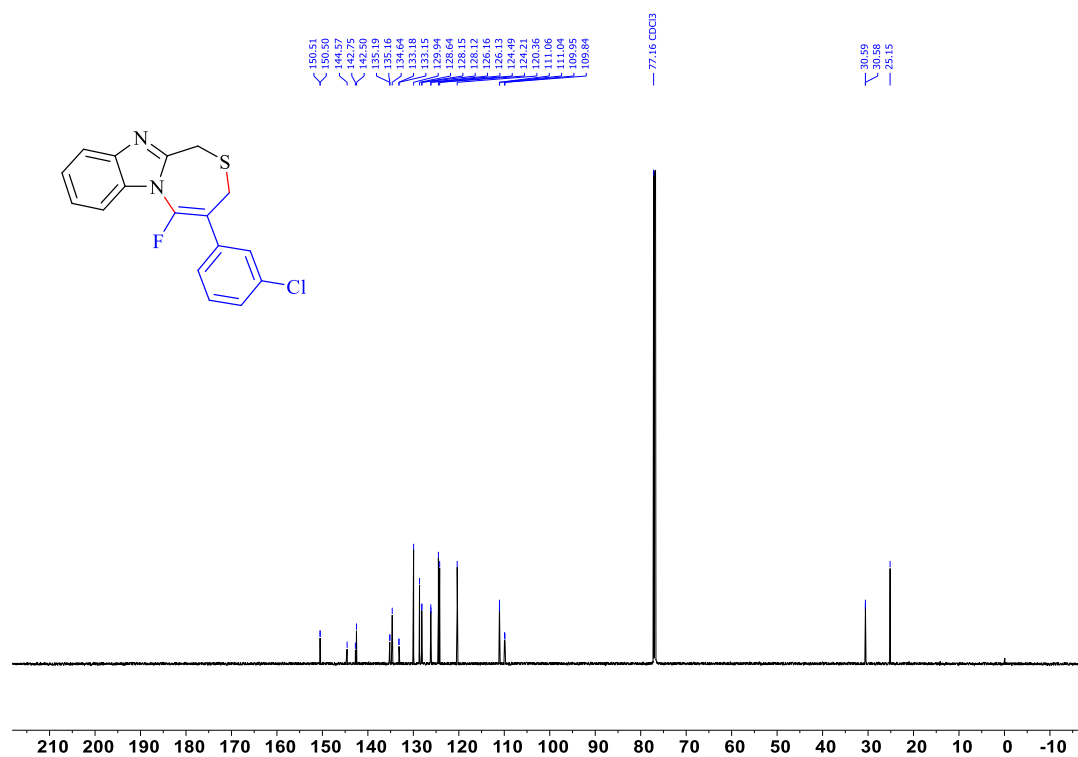

$^{19}\text{F}$ -NMR spectrum of product **31** in  $\text{CDCl}_3$  (565 MHz)

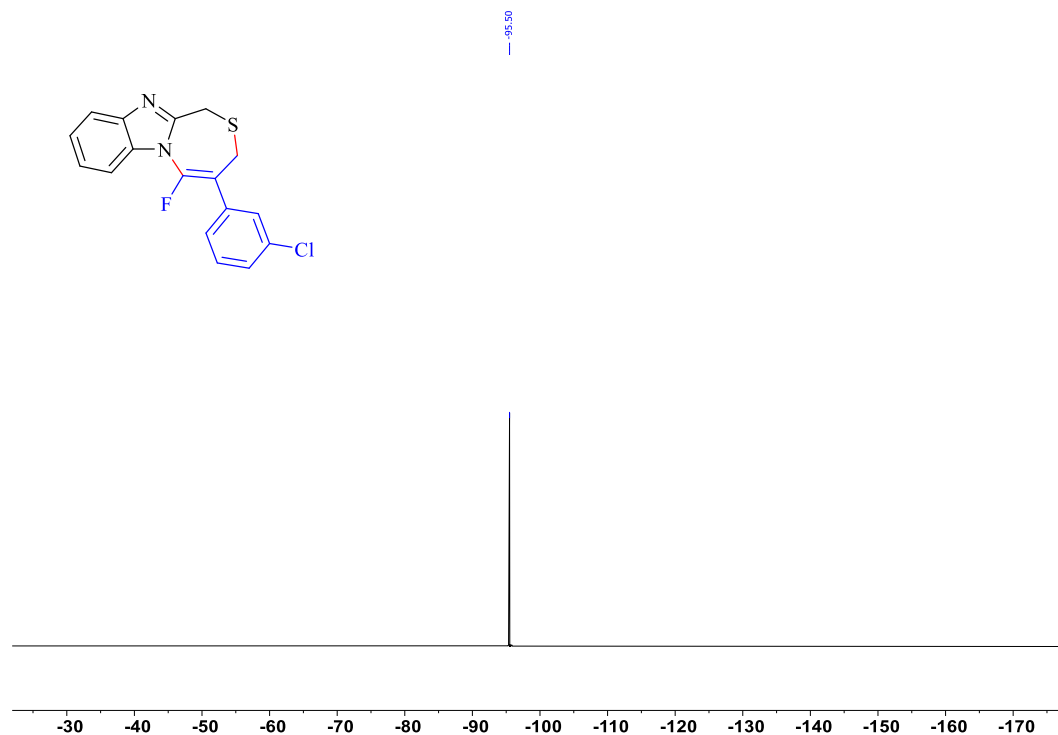

$^1\text{H}$  NMR spectrum of product **3m** in  $\text{CDCl}_3$  (400 MHz)

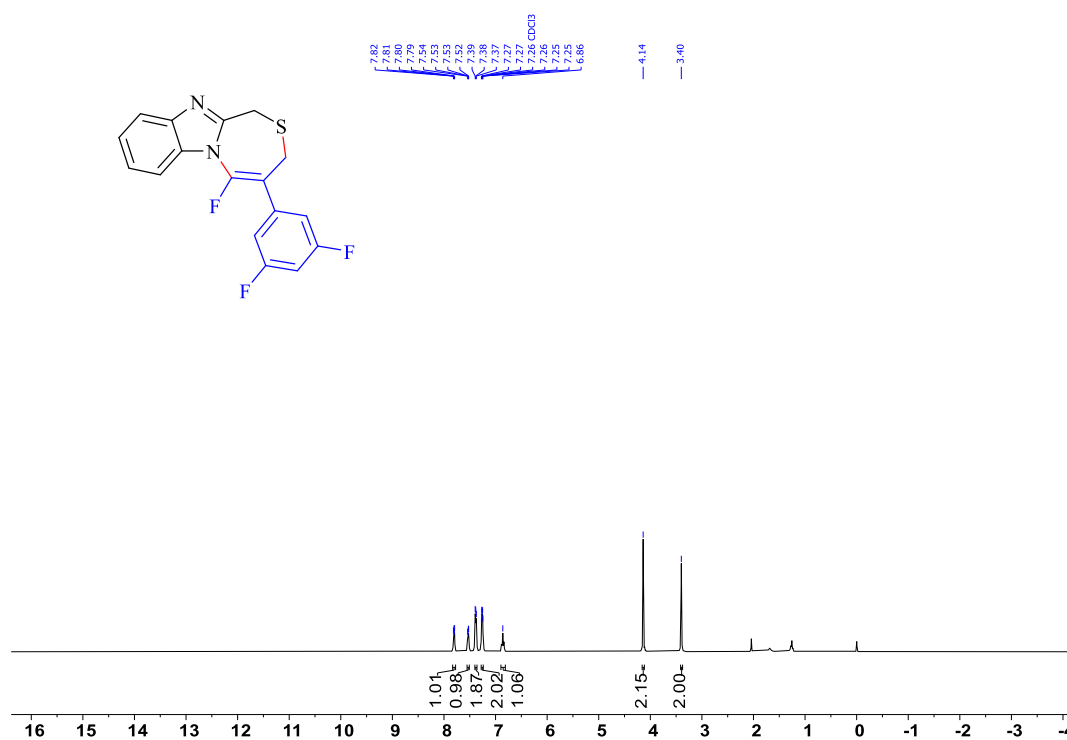

$^{13}\text{C}$  NMR spectrum of product **3m** in  $\text{CDCl}_3$  (101 MHz)

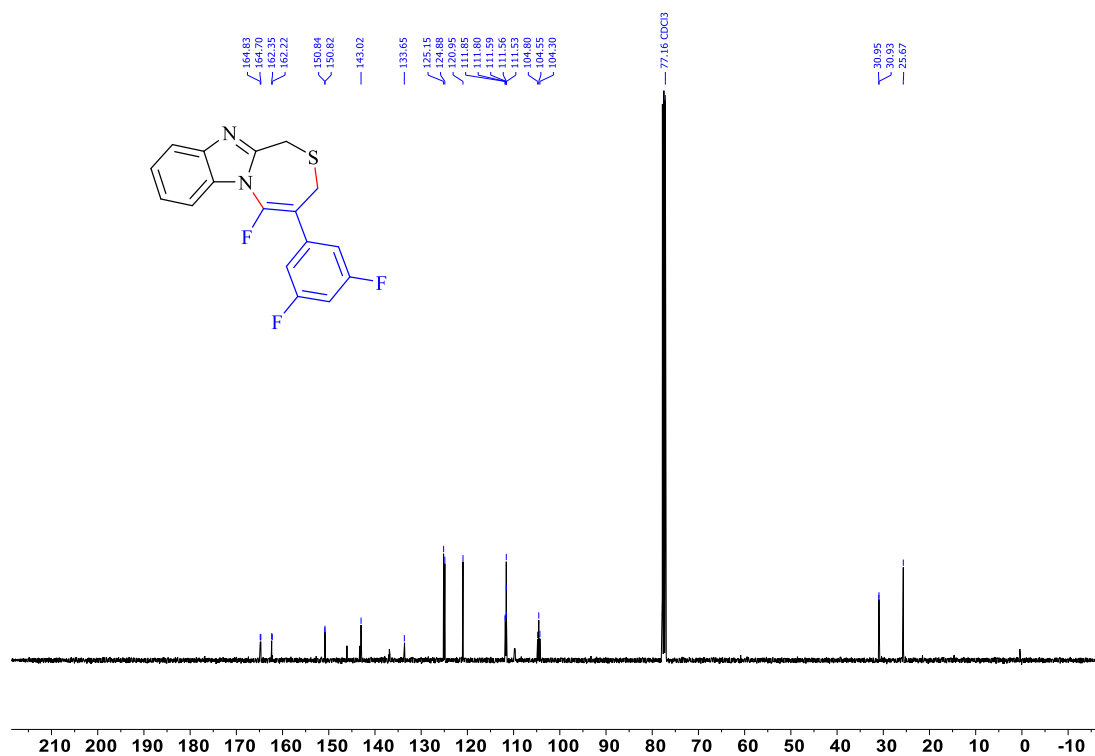

--|= .51.fid  
FM-9

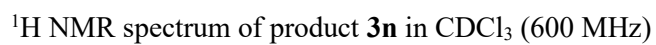

F-3n(1).1.fid

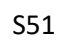

$^{13}\text{C}$  NMR spectrum of product **3n** in  $\text{CDCl}_3$  (151 MHz)

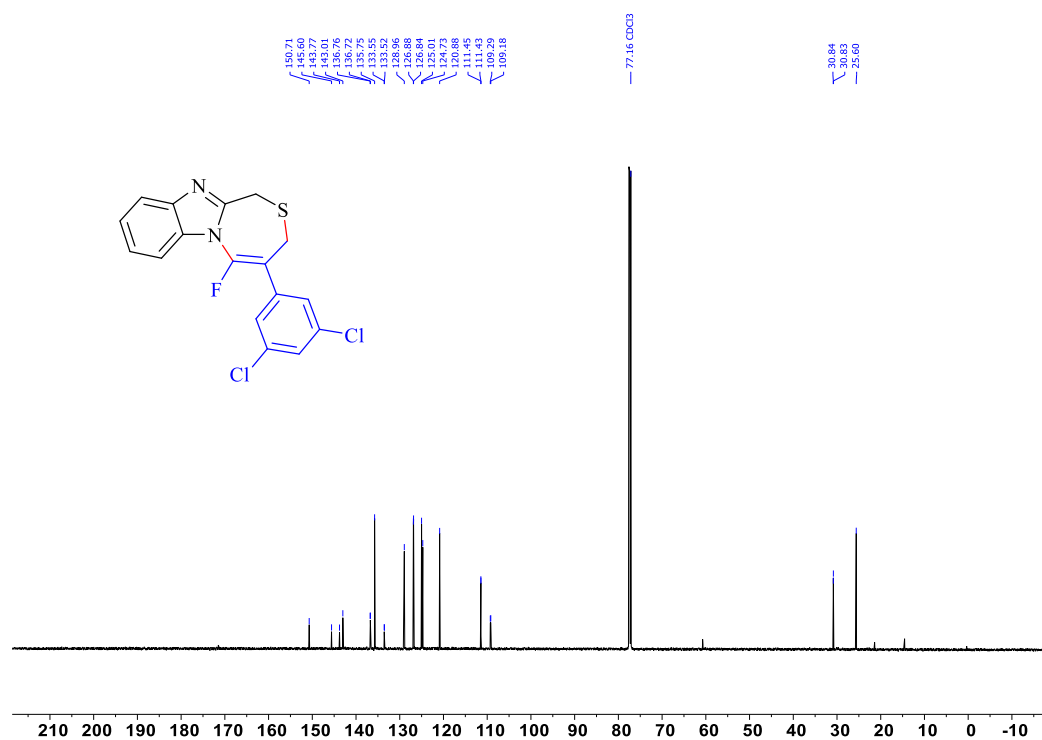

$^{19}\text{F}$ -NMR spectrum of product **3n** in  $\text{CDCl}_3$  (565 MHz)

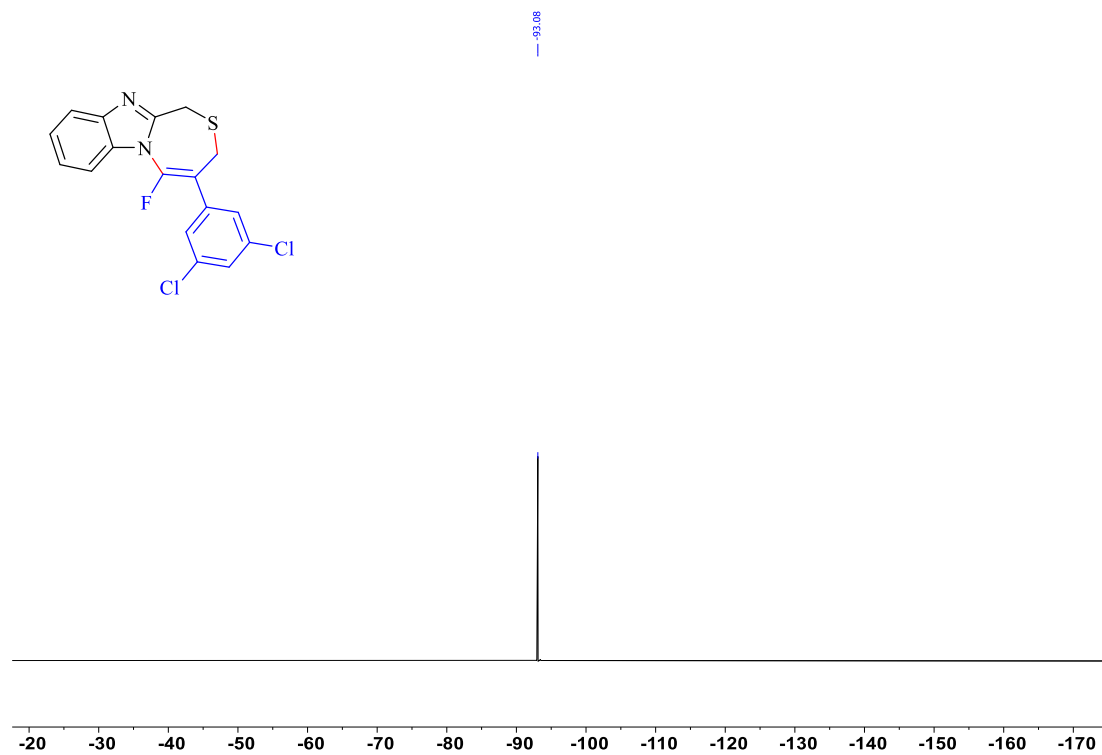

$^1\text{H}$  NMR spectrum of product **3o** in  $\text{CDCl}_3$  (600 MHz)

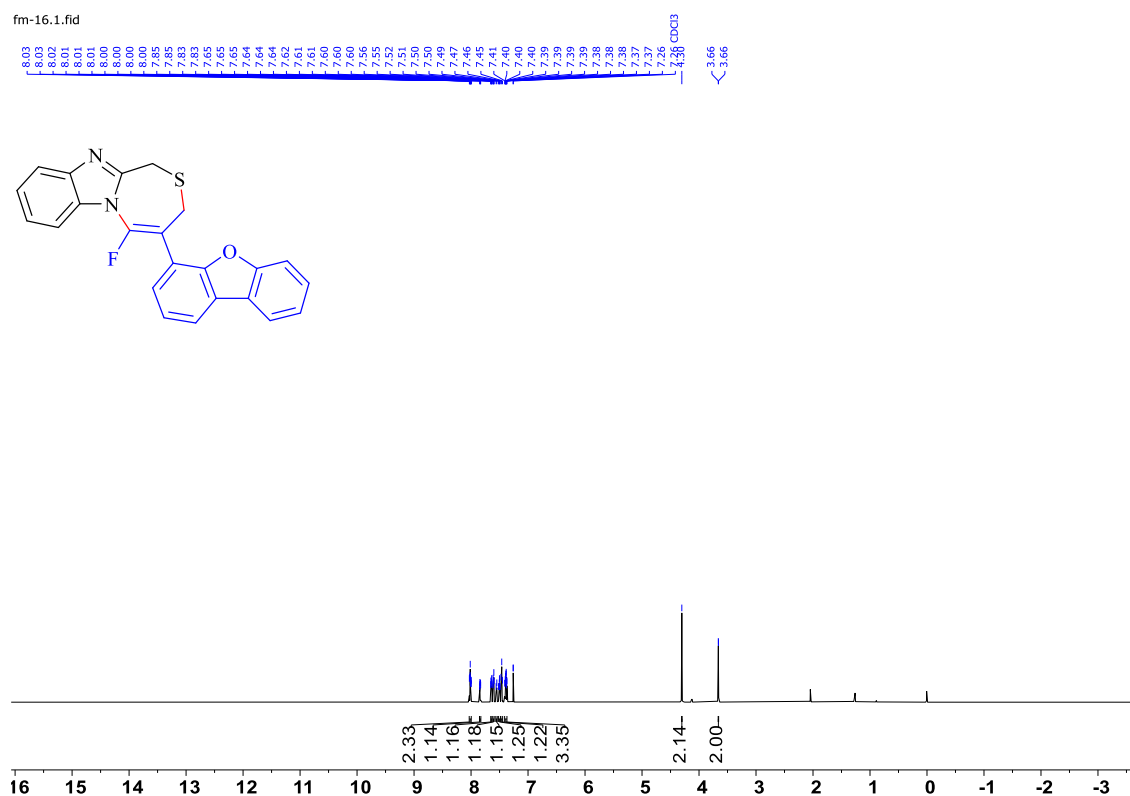

$^{19}\text{F}$ -NMR spectrum of product **3o** in  $\text{CDCl}_3$  (377 MHz)

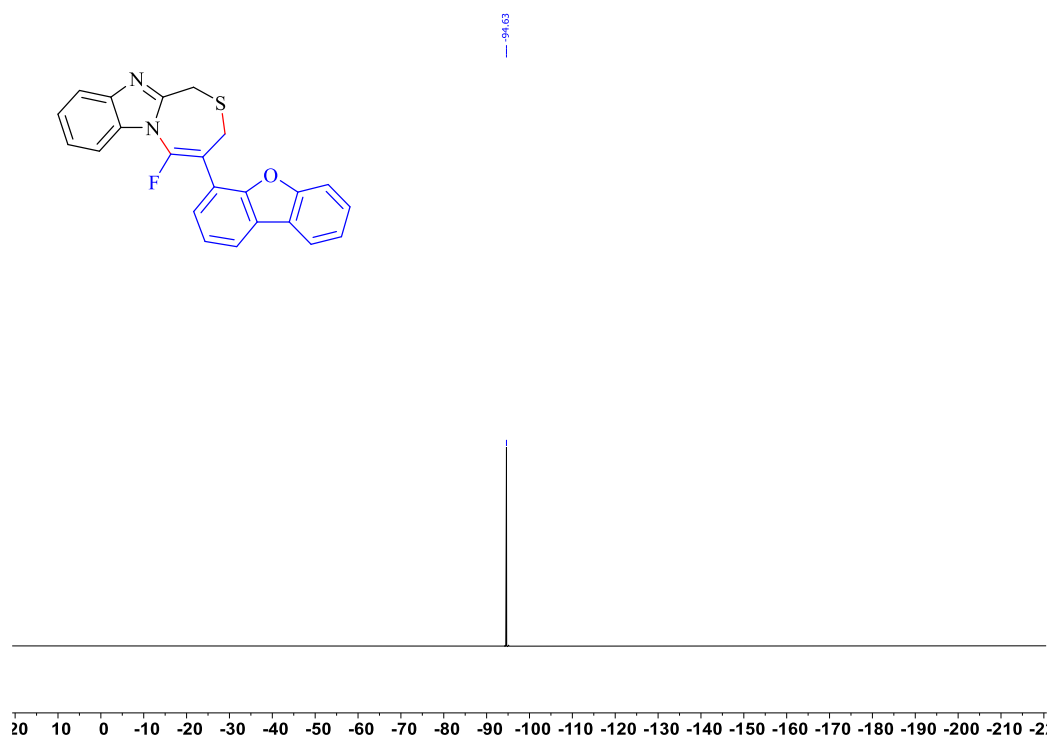

$^1\text{H}$  NMR spectrum of product **3p** in  $\text{CDCl}_3$  (400 MHz)

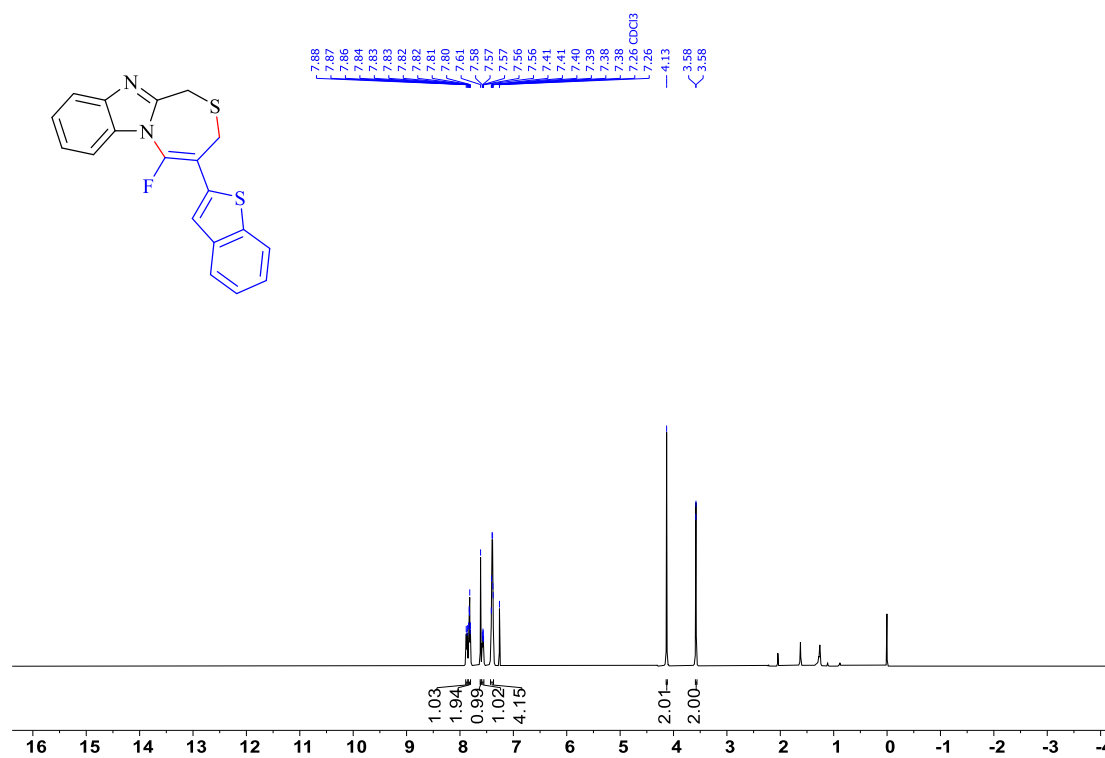

$^{13}\text{C}$  NMR spectrum of product **3p** in  $\text{CDCl}_3$  (101 MHz)

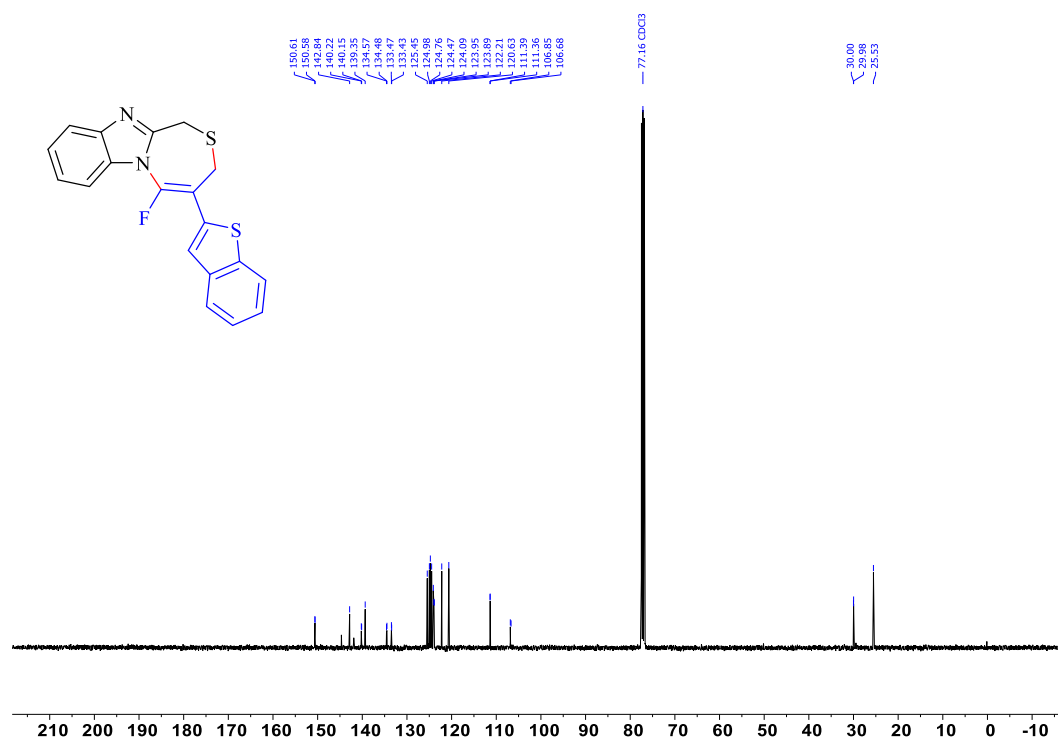

$^{19}\text{F}$ -NMR spectrum of product **3p** in  $\text{CDCl}_3$  (377 MHz)

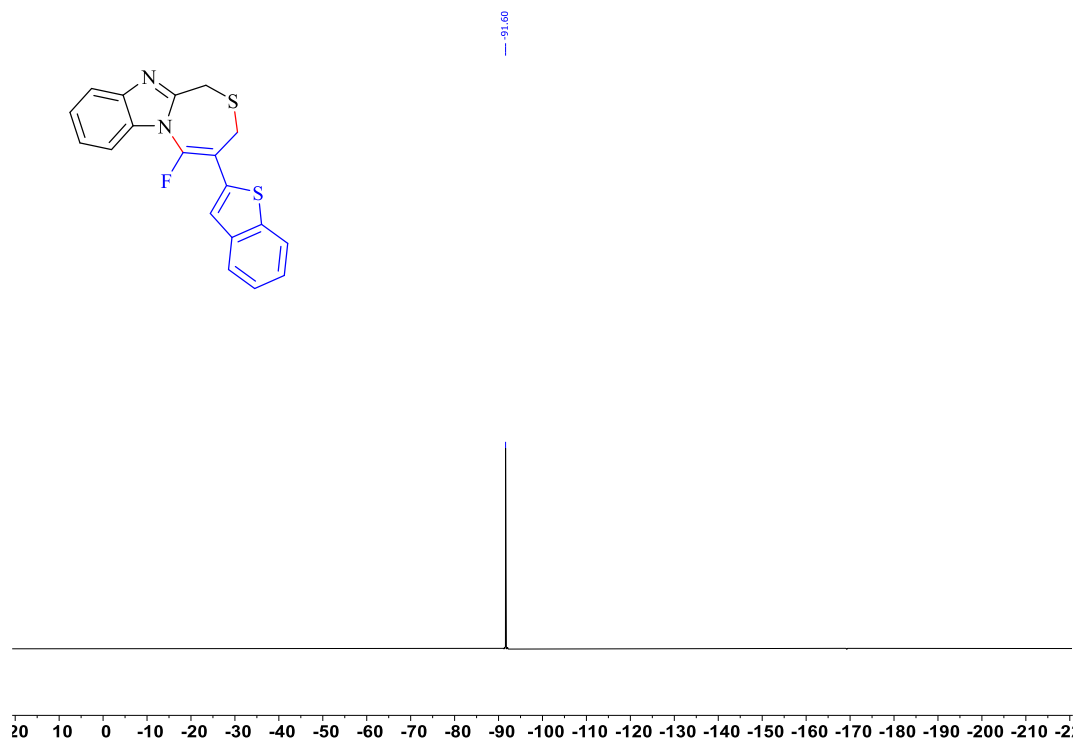

$^1\text{H}$  NMR spectrum of product **3q** in  $\text{CDCl}_3$  (400 MHz)

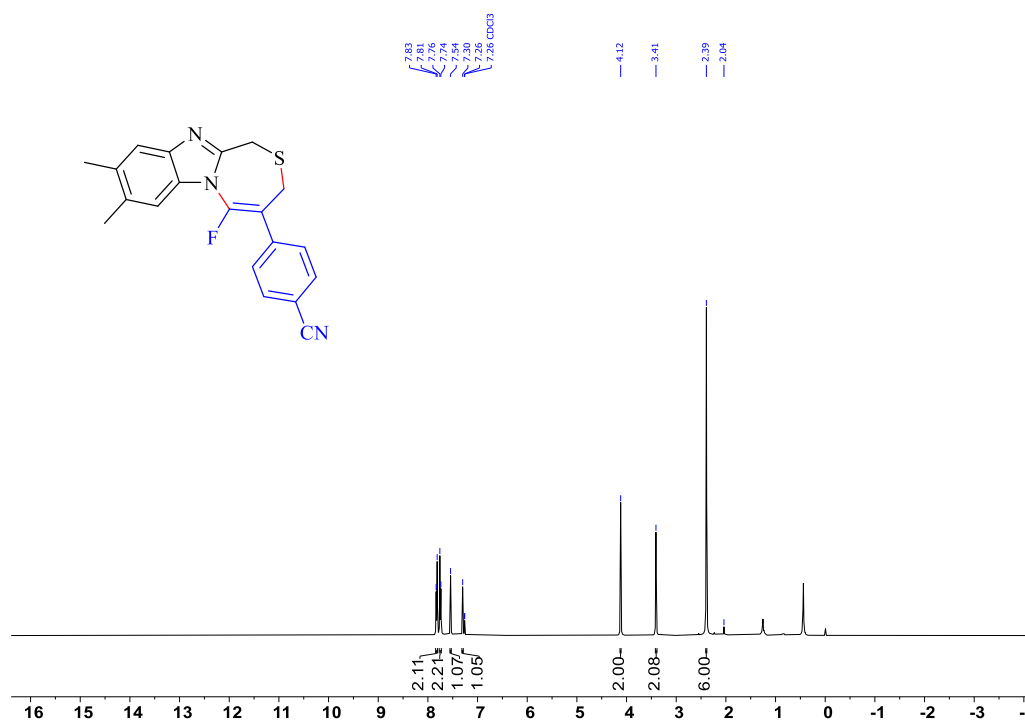

$^{13}\text{C}$  NMR spectrum of product **3q** in  $\text{CDCl}_3$  (101 MHz)

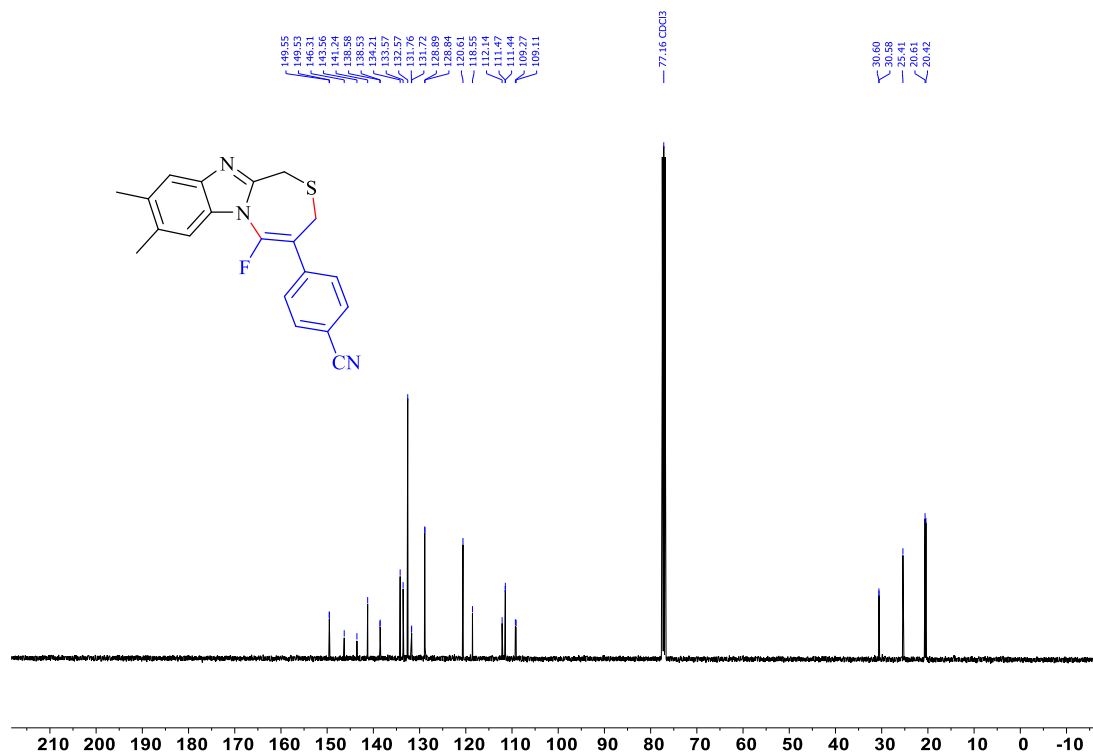



$^{19}\text{F}$ -NMR spectrum of product **3q** in  $\text{CDCl}_3$  (377 MHz)

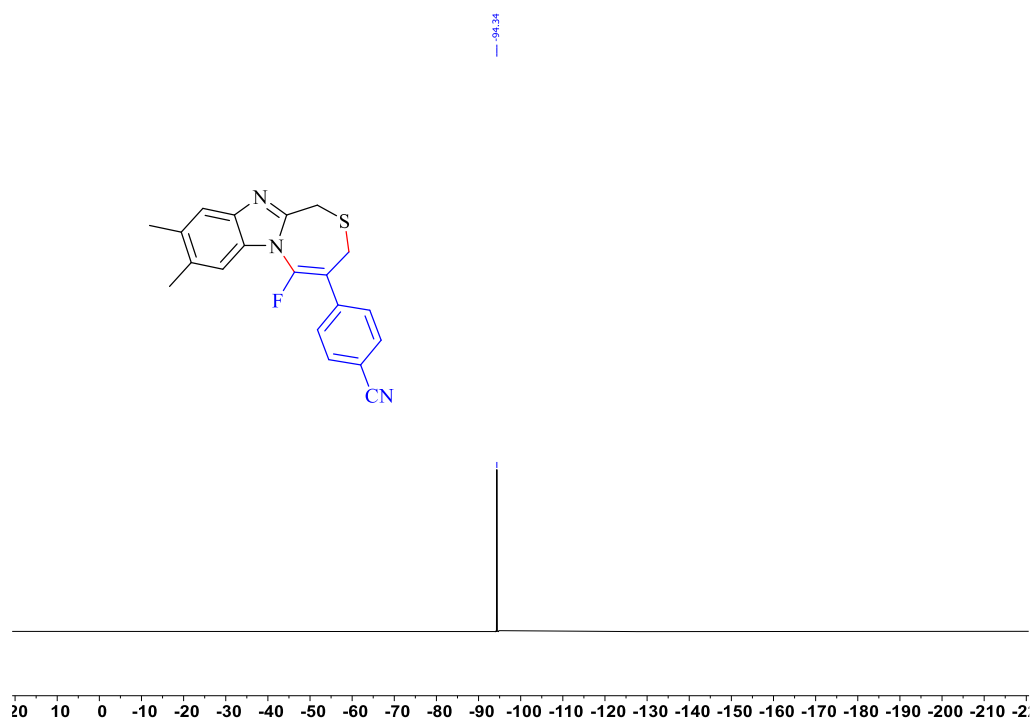

$^1\text{H}$  NMR spectrum of product **3r** in  $\text{CDCl}_3$  (600 MHz)

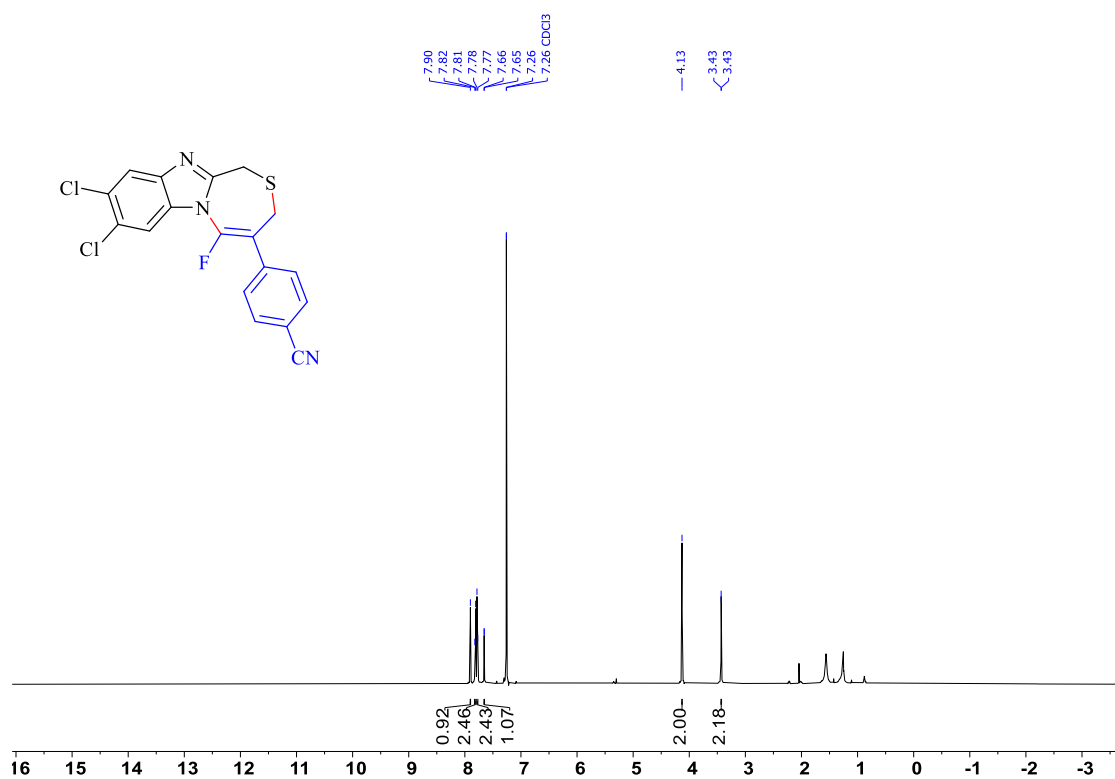

Chemical structure: N#Cc1ccc(cc1)C2=C(F)N3C(=N2)SCC3c4cc(Cl)c(Cl)cc4

<sup>13</sup>C NMR peak list (ppm):

- 152.24
- 144.44
- 142.01
- 139.22
- 137.68
- 137.64
- 132.52
- 132.04
- 132.04
- 128.97
- 128.79
- 128.67
- 121.74
- 118.19
- 112.54
- 112.48
- 110.35
- 110.25
- 77.16 (CDCl<sub>3</sub>)
- 30.33
- 25.11

Chemical structure of 2-(2,4-dichlorophenyl)-4-(4-cyanophenyl)-1,3,4-oxadiazole-5-carboxamide hydrochloride is shown. The structure features a 1,3,4-oxadiazole ring substituted with a 2,4-dichlorophenyl group, a 4-cyanophenyl group, and a carboxamide group. The chemical structure is displayed in blue.

$^1\text{H}$  NMR spectrum of product **3s** in  $\text{CDCl}_3$  (600 MHz)

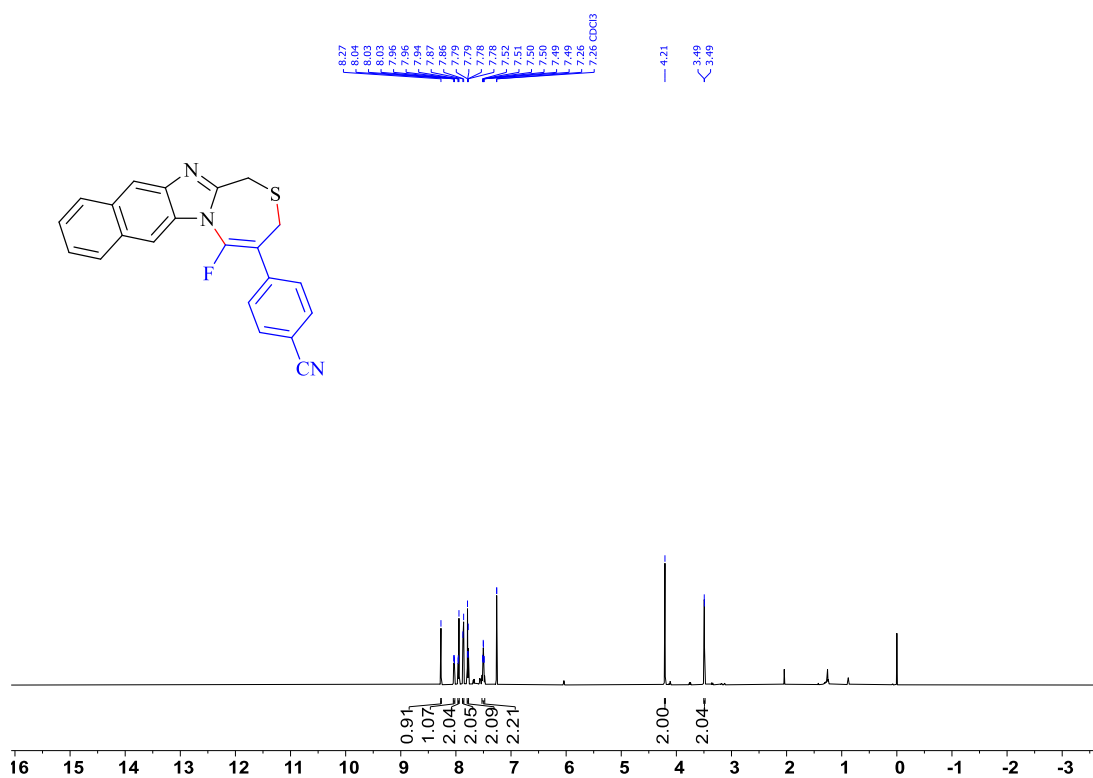

$^{13}\text{C}$  NMR spectrum of product **3s** in  $\text{CDCl}_3$  (151 MHz)

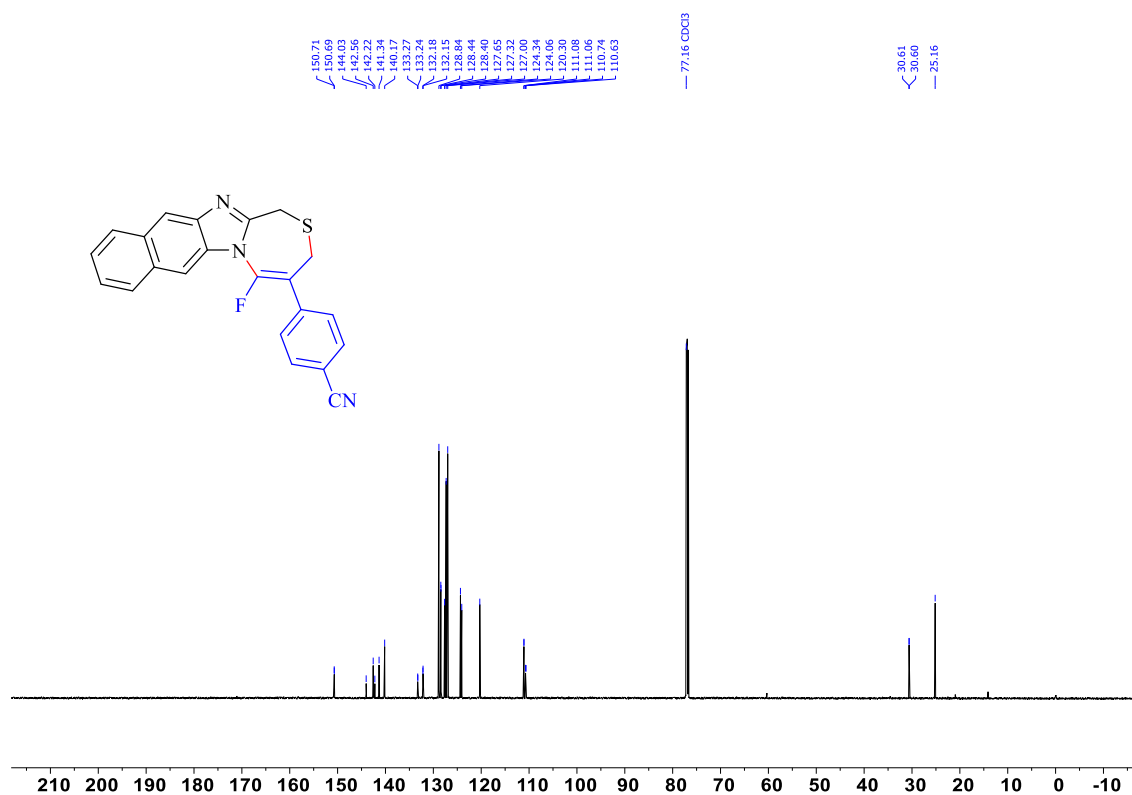

$^{19}\text{F}$ -NMR spectrum of product **3s** in  $\text{CDCl}_3$  (565 MHz)

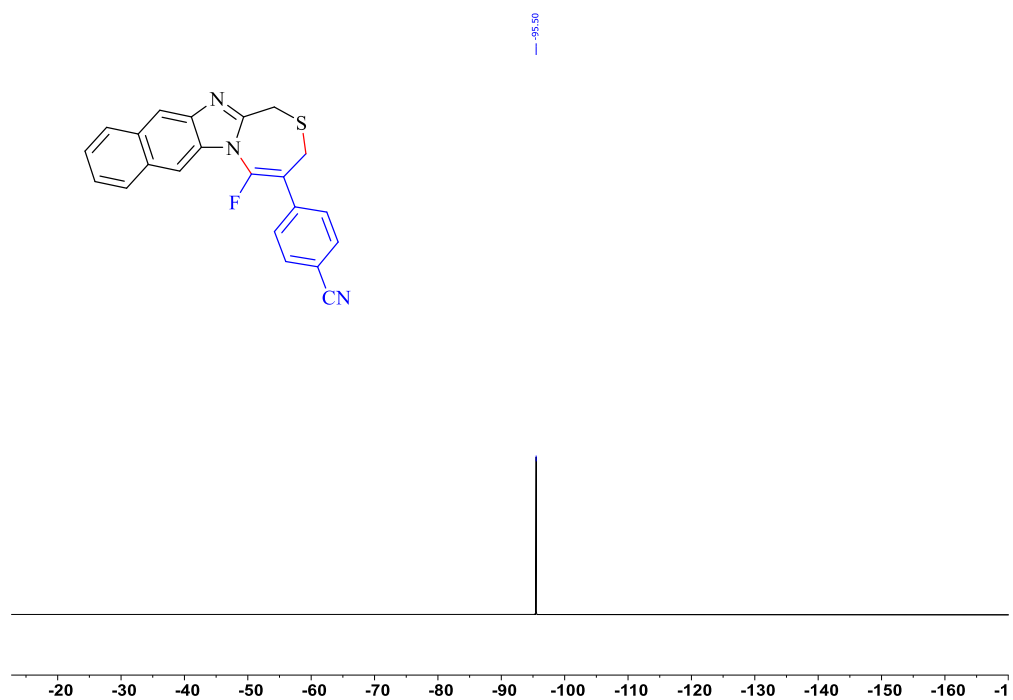

$^1\text{H}$  NMR spectrum of product **5a** in  $\text{CDCl}_3$  (600 MHz)

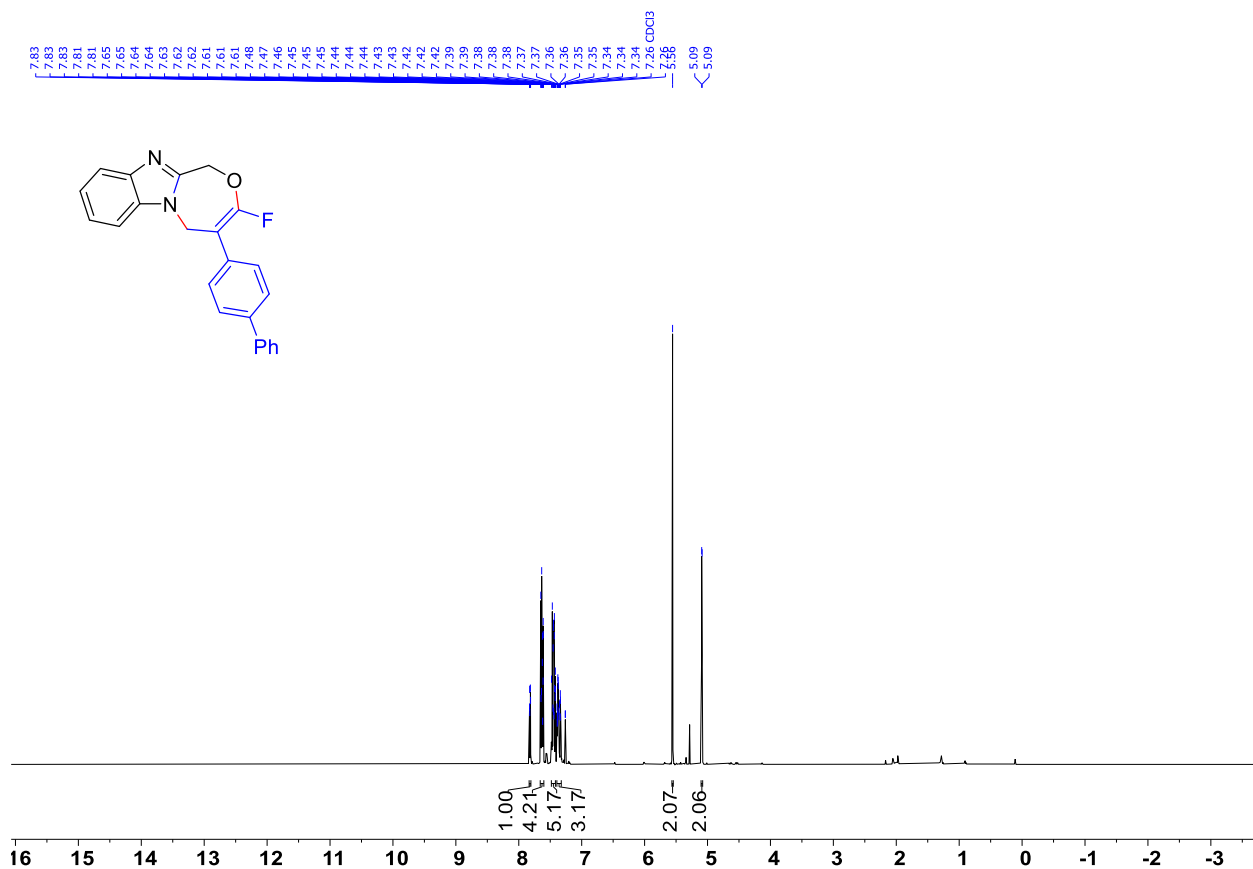

$^{13}\text{C}$  NMR spectrum of product **5a** in  $\text{CDCl}_3$  (151 MHz)

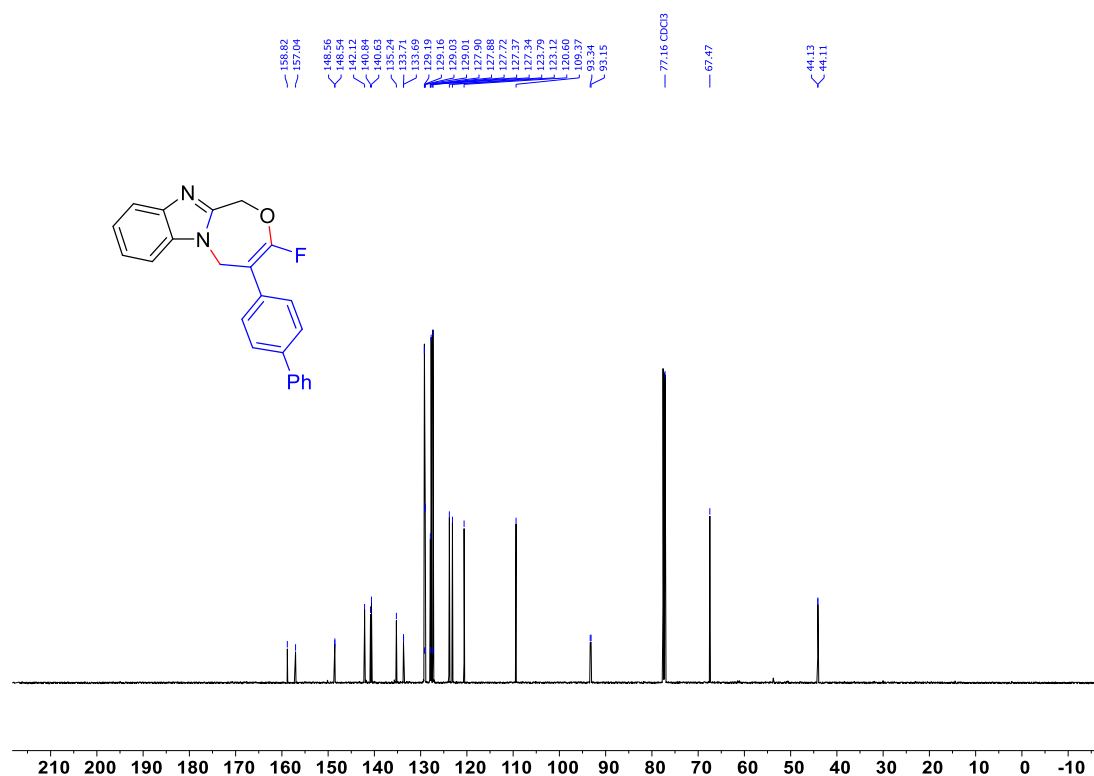

$^{19}\text{F}$ -NMR spectrum of product **5a** in  $\text{CDCl}_3$  (565 MHz)

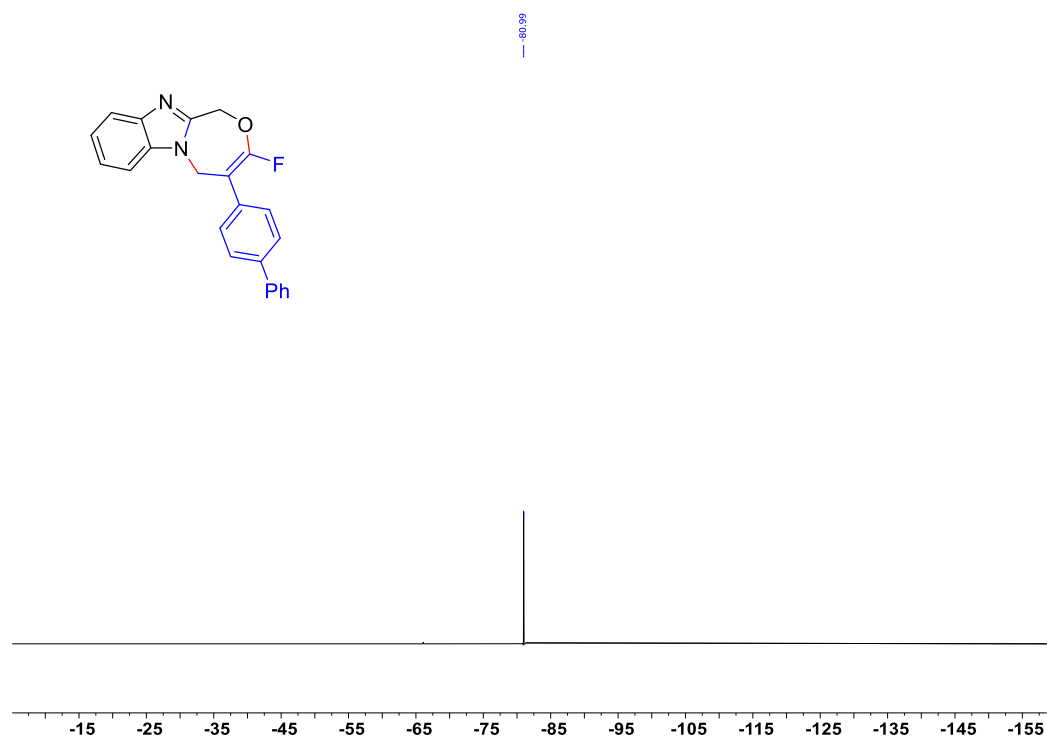

$^1\text{H}$  NMR spectrum of product **5b** in  $\text{CDCl}_3$  (600 MHz)

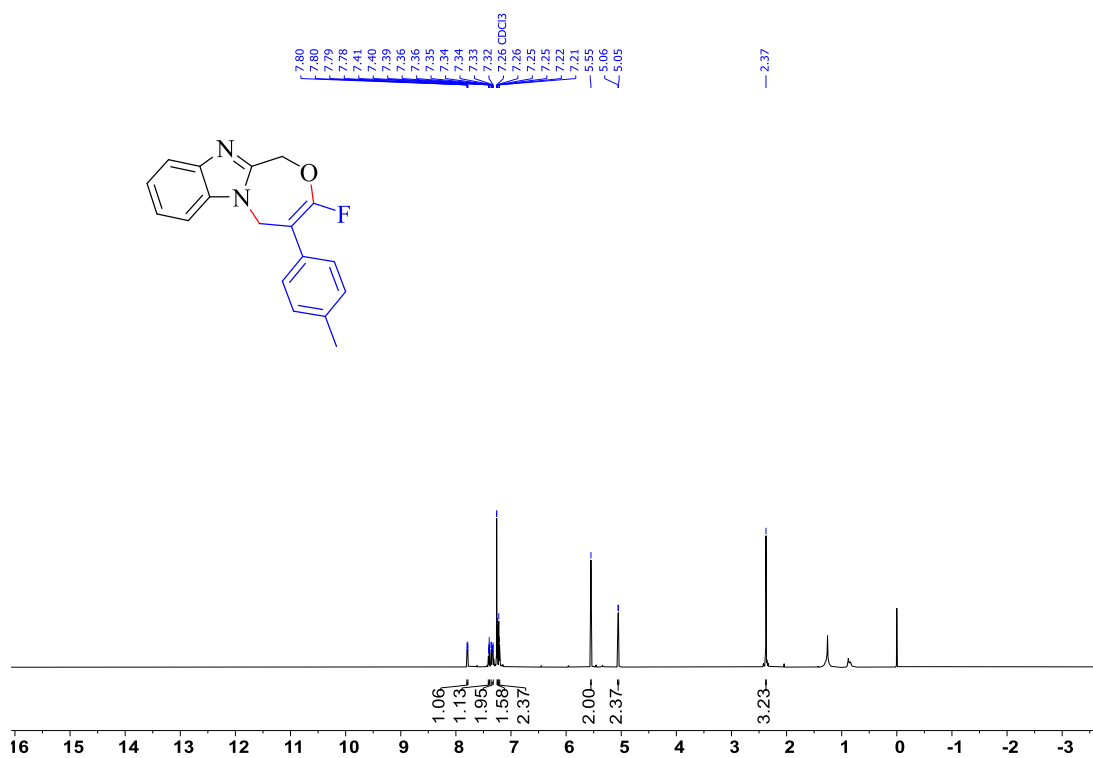

$^{13}\text{C}$  NMR spectrum of product **5b** in  $\text{CDCl}_3$  (151 MHz)

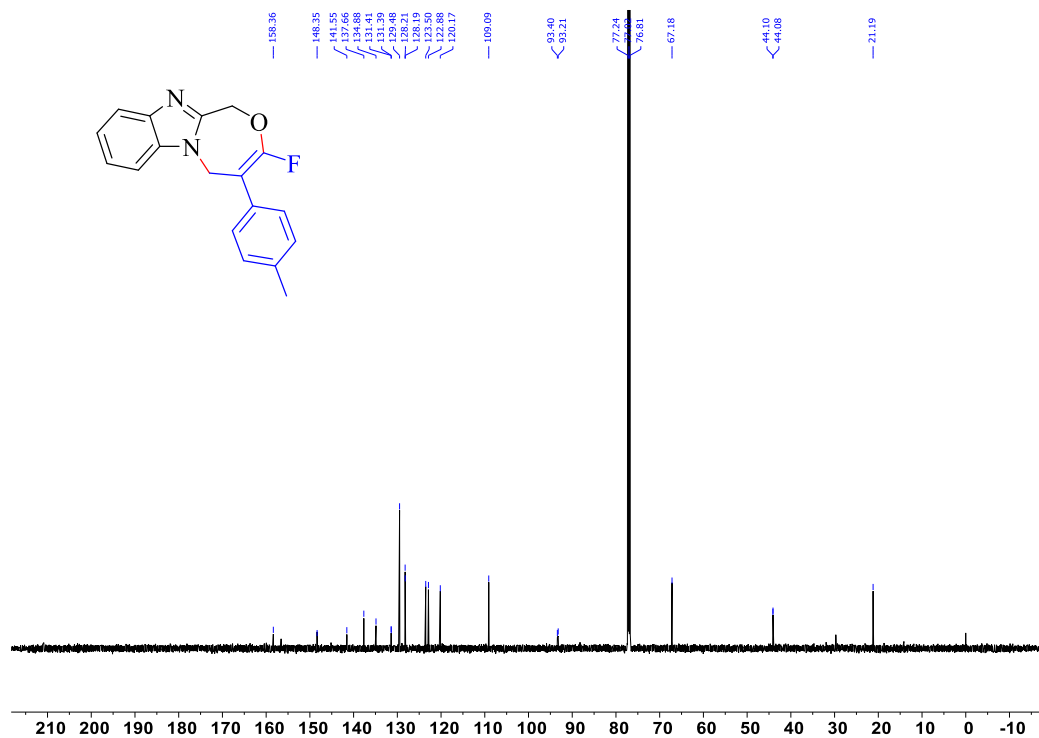

$^{19}\text{F}$ -NMR spectrum of product **5b** in  $\text{CDCl}_3$  (565 MHz)

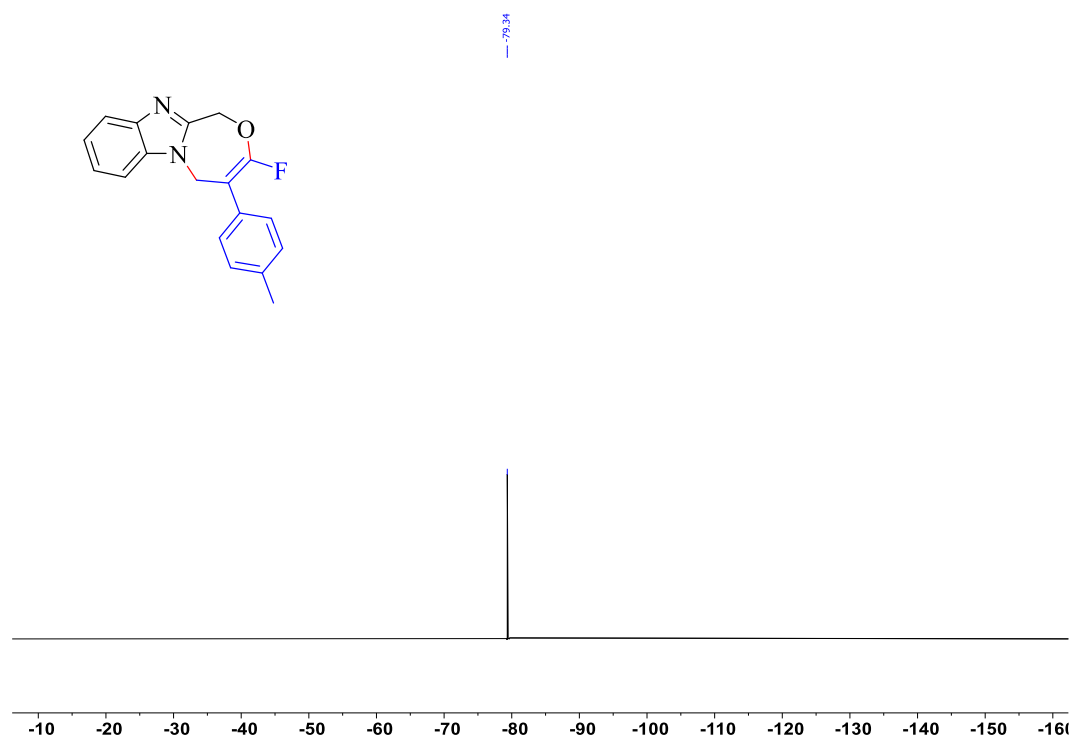

$^1\text{H}$  NMR spectrum of product **5c** in  $\text{CDCl}_3$  (600 MHz)

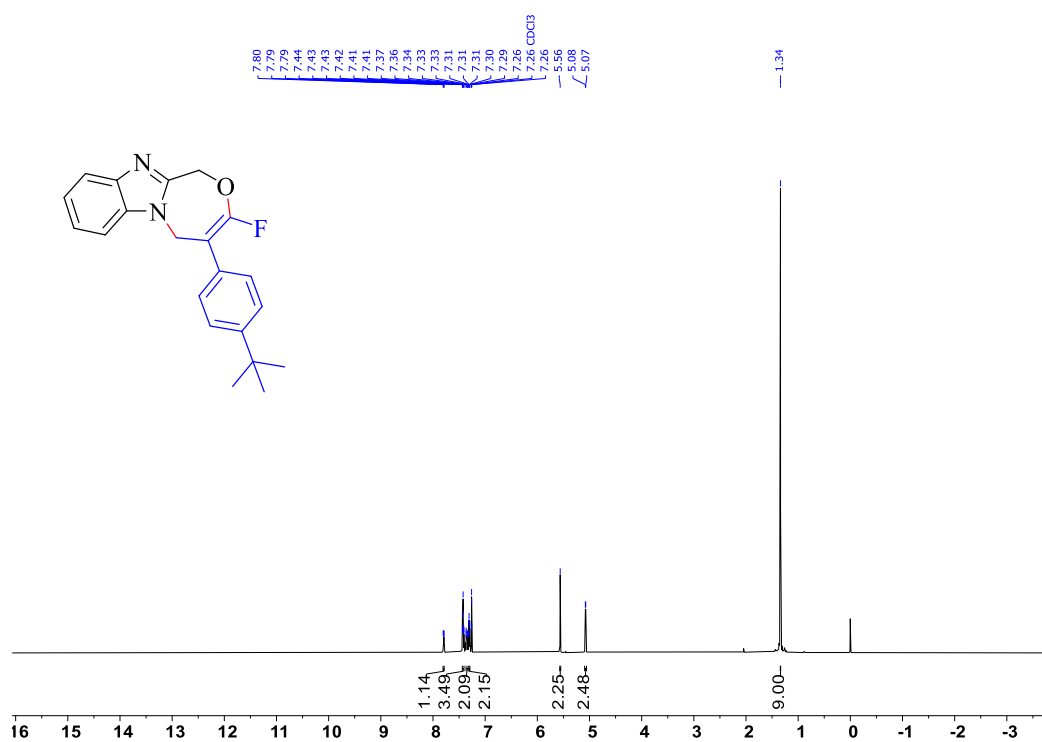

$^{13}\text{C}$  NMR spectrum of product **5c** in  $\text{CDCl}_3$  (151 MHz)

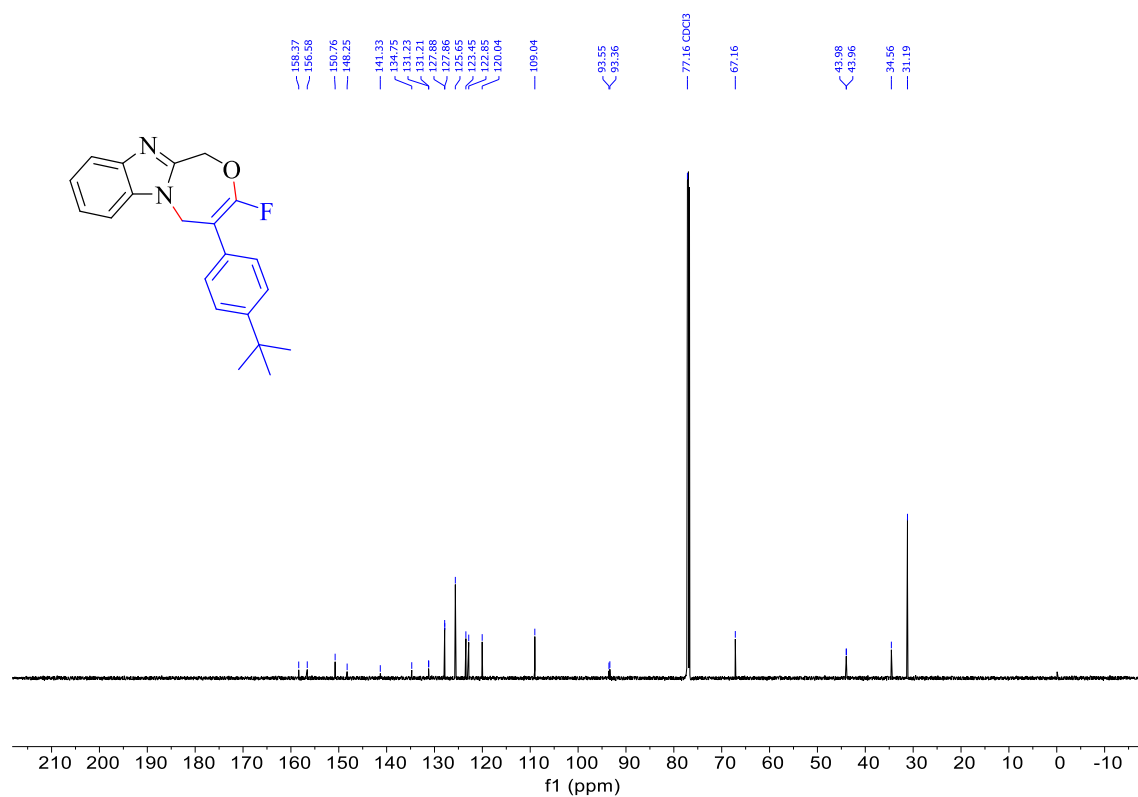

$^{19}\text{F}$ -NMR spectrum of product **5c** in  $\text{CDCl}_3$  (565 MHz)

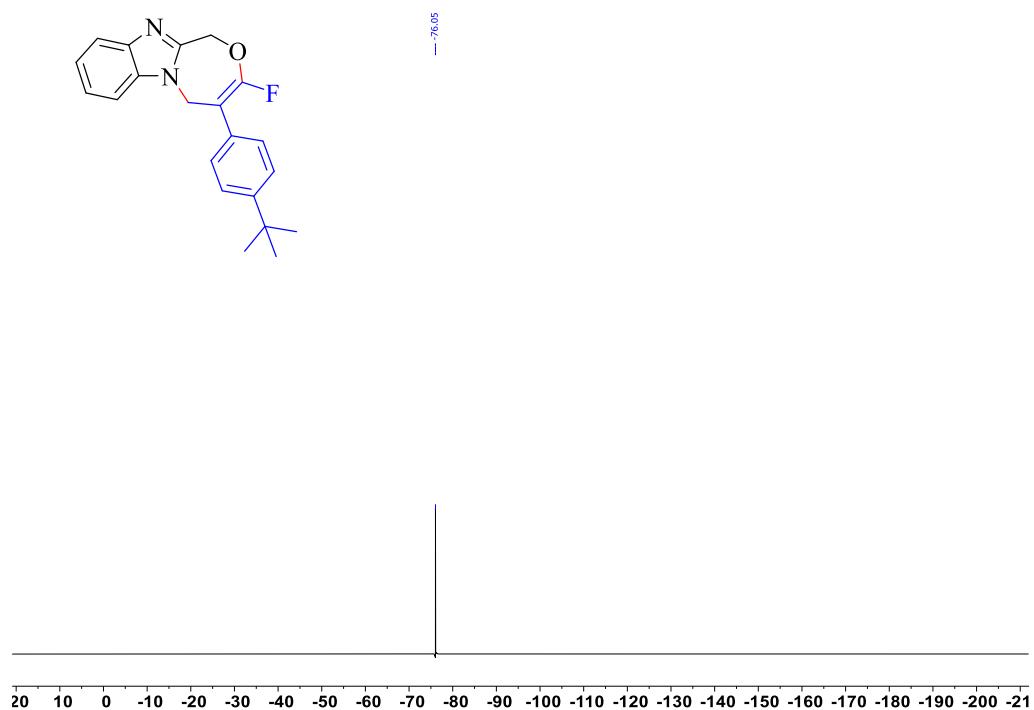



$^1\text{H}$  NMR spectrum of product **5d** in  $\text{CDCl}_3$  (600 MHz)

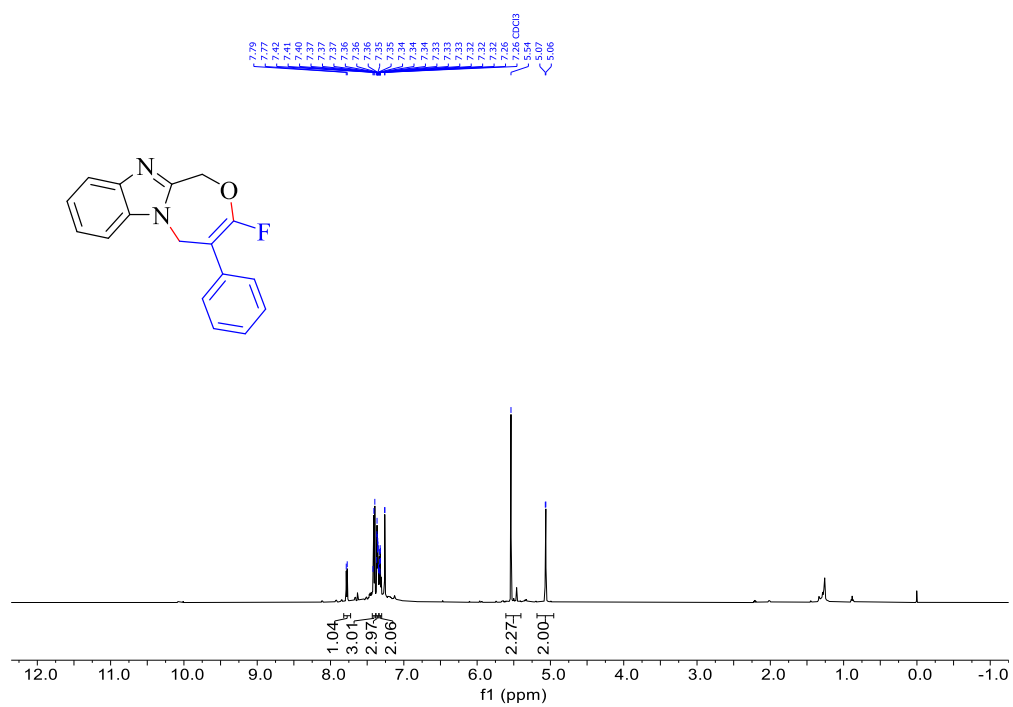

$^{13}\text{C}$  NMR spectrum of product **5d** in  $\text{CDCl}_3$  (151 MHz)

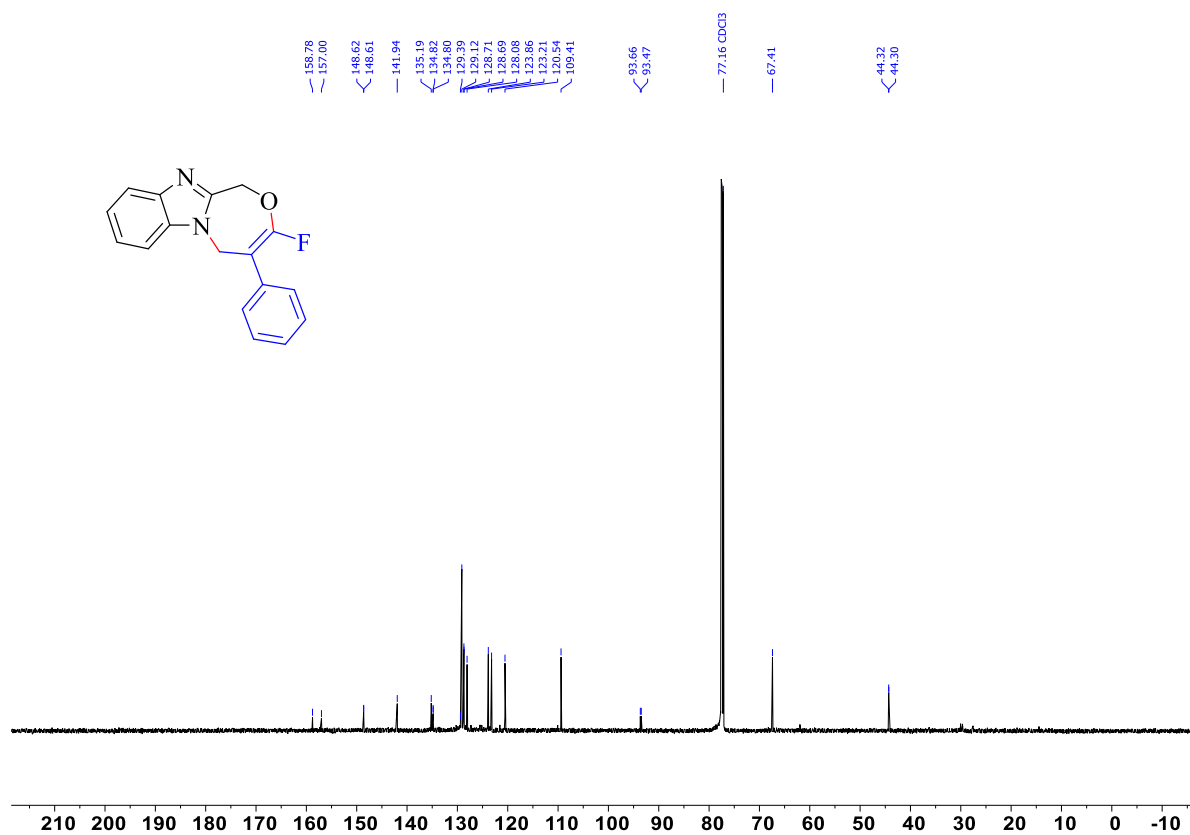

$^{19}\text{F}$ -NMR spectrum of product **5d** in  $\text{CDCl}_3$  (565 MHz)

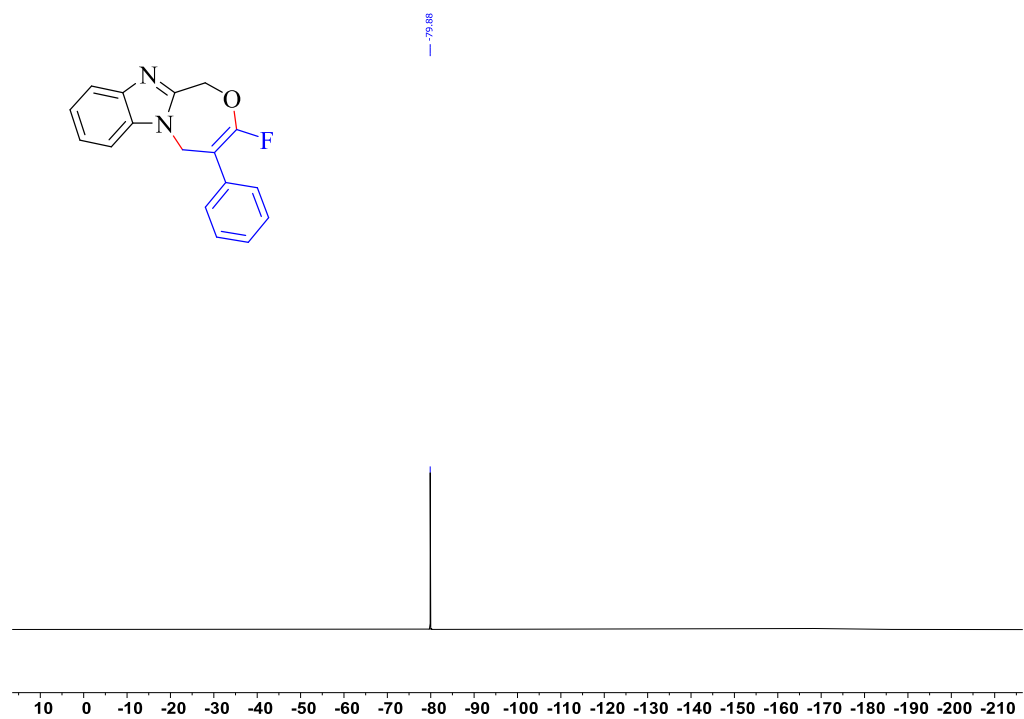

$^1\text{H}$  NMR spectrum of product **5e** in  $\text{CDCl}_3$  (600 MHz)

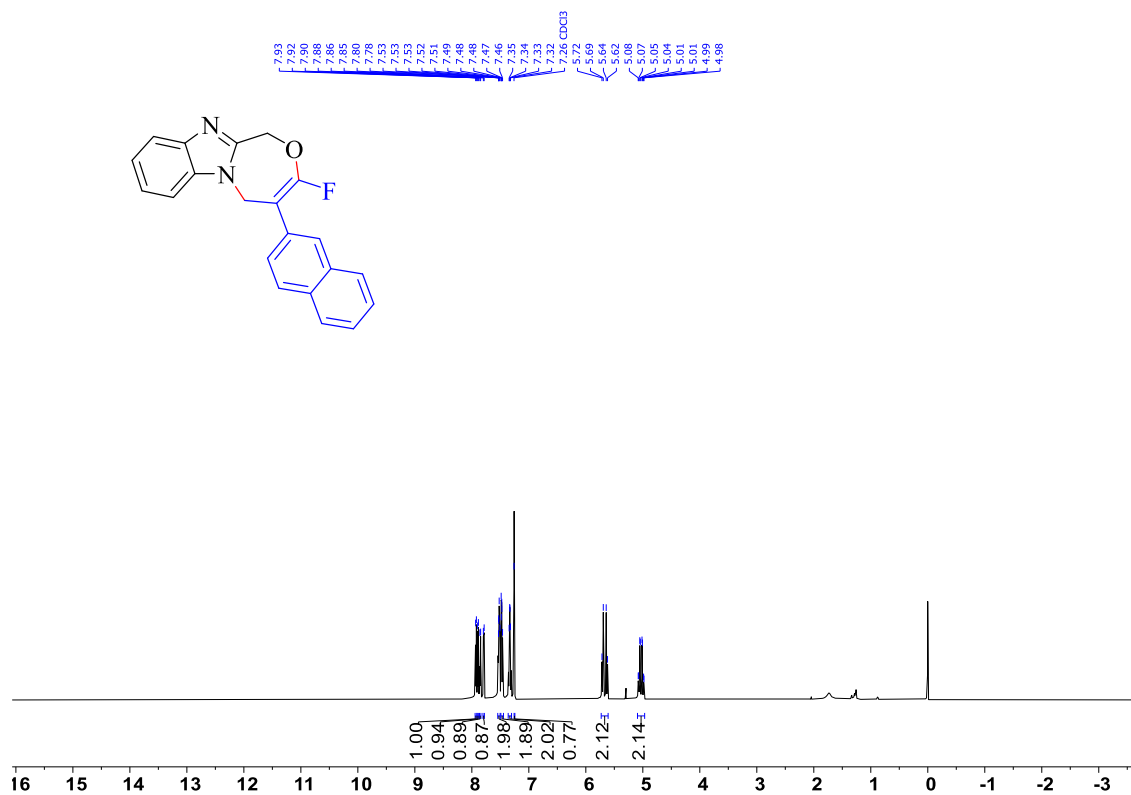

$^{13}\text{C}$  NMR spectrum of product **5e** in  $\text{CDCl}_3$  (151 MHz)

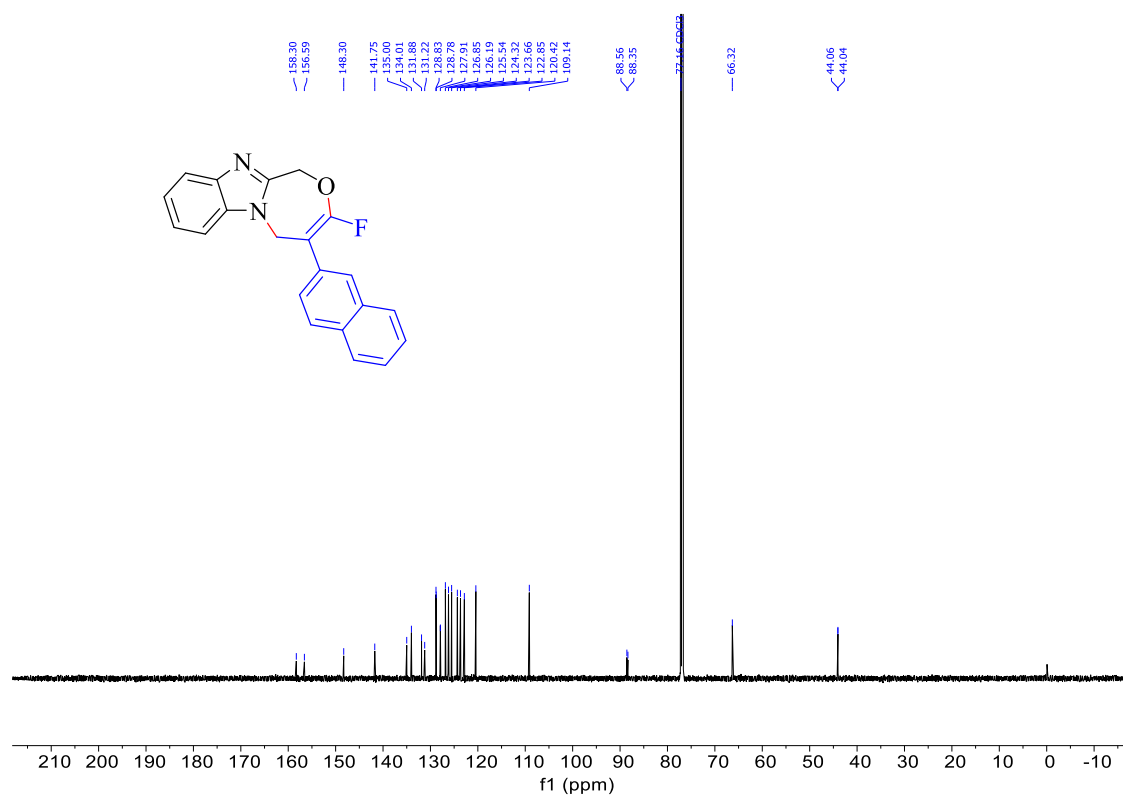

$^{19}\text{F}$ -NMR spectrum of product **5e** in  $\text{CDCl}_3$  (565 MHz)

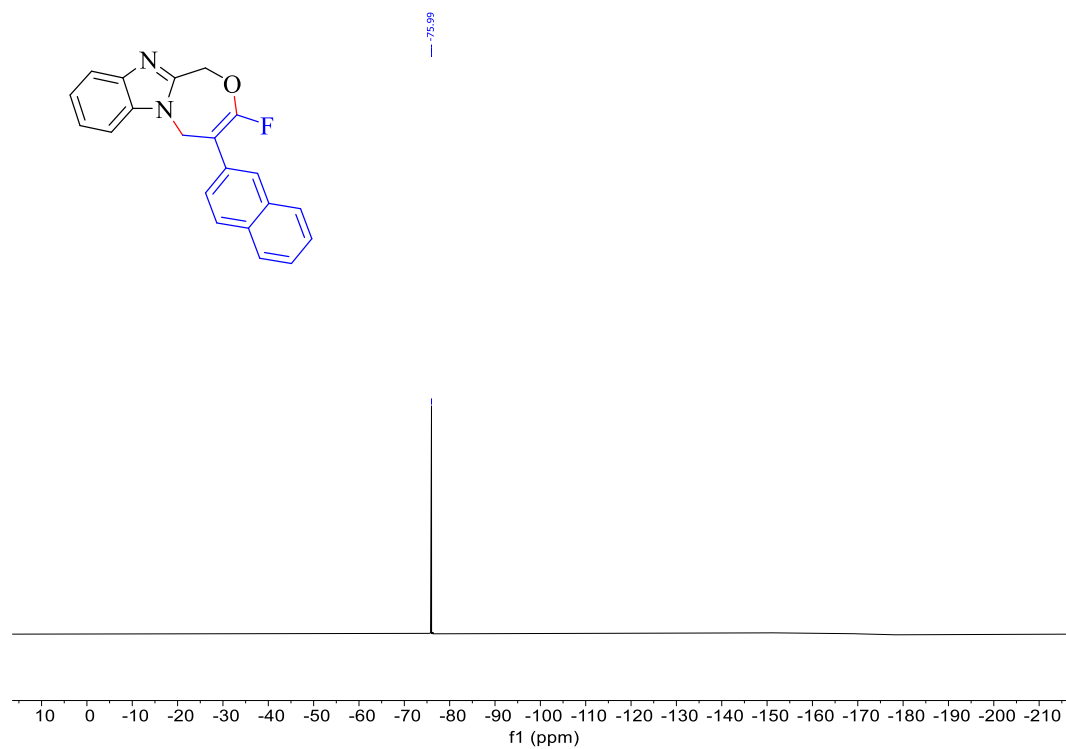

$^1\text{H}$  NMR spectrum of product **5f** in  $\text{CDCl}_3$  (400 MHz)

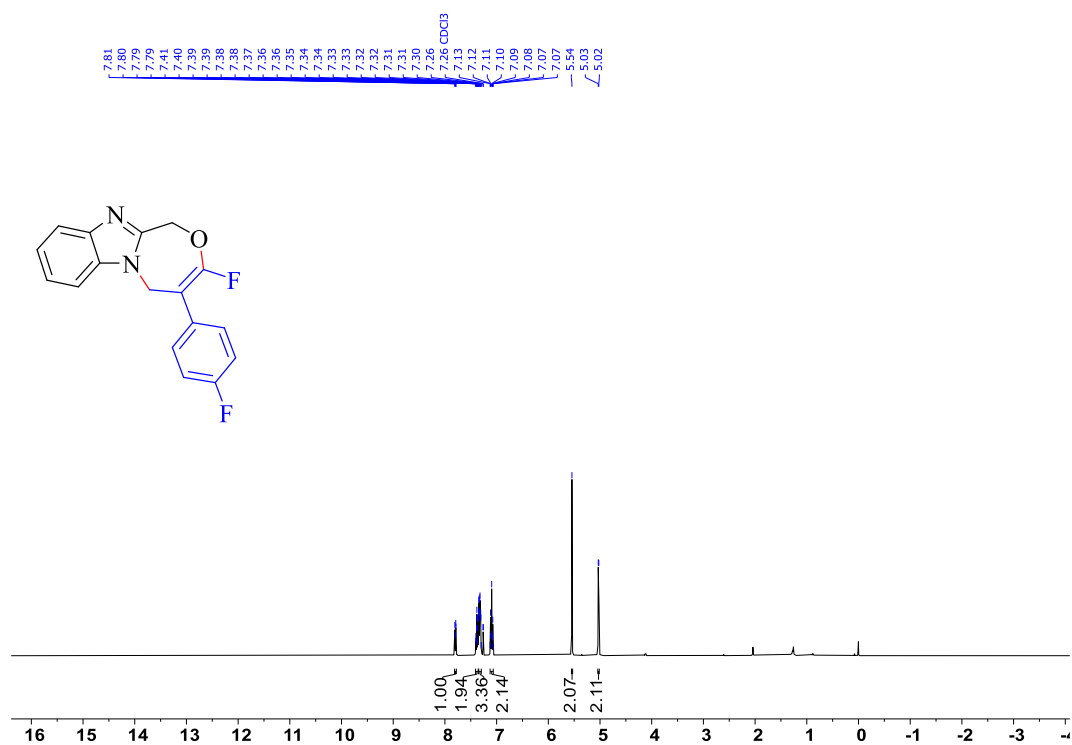

$^{13}\text{C}$  NMR spectrum of product **5f** in  $\text{CDCl}_3$  (101 MHz)

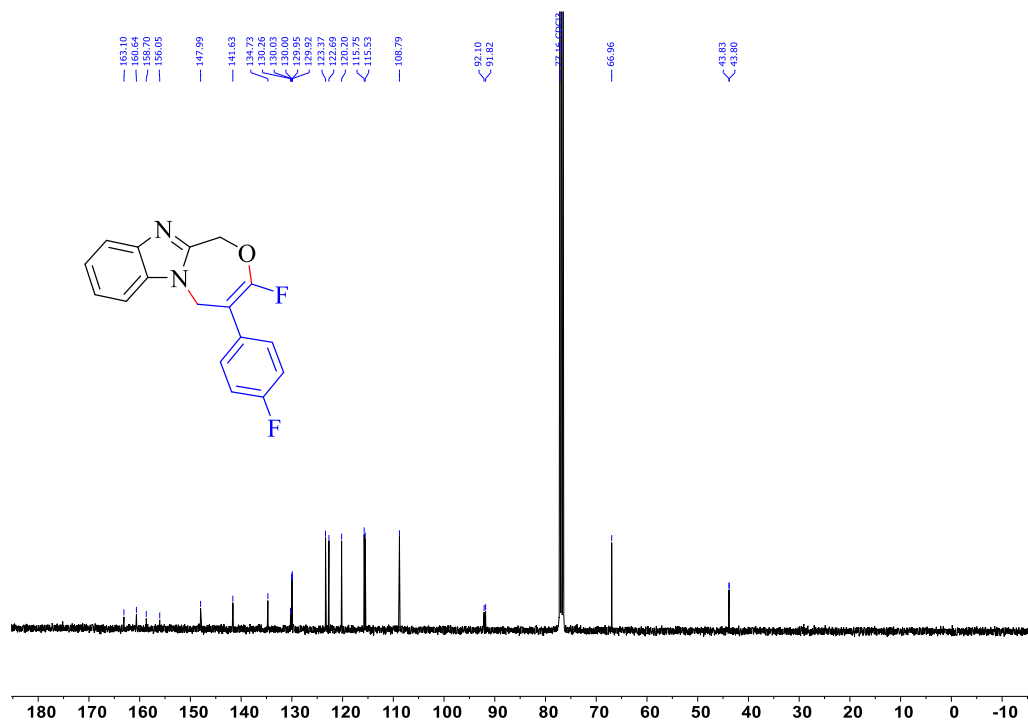

Chemical structure of 1-(2-(4-fluorophenyl)-2-fluorovinyl)-1H-indazole-3-ylmethoxy (top left) and its corresponding <sup>13</sup>C NMR spectrum (bottom). The spectrum shows two main peaks at -79.58 ppm and -113.69 ppm, with a reference peak at 0 ppm.

Chemical structure of 2-(4-chlorophenyl)-2-fluoro-1,3-benzoxazin-4-ylidene is shown above the  $^1\text{H}$  NMR spectrum. The spectrum displays peaks in the aromatic region (7.25-7.79 ppm) and aliphatic region (4.08-5.10 ppm). Integration values are provided below the peaks.

| Chemical Shift (ppm) | Integration |
|----------------------|-------------|
| 7.79                 | 1.00        |
| 7.78                 | 4.08        |
| 7.77                 | 1.12        |
| 7.39                 | 1.48        |
| 7.38                 | 1.02        |
| 7.37                 |             |
| 7.36                 |             |
| 7.35                 |             |
| 7.34                 |             |
| 7.33                 |             |
| 7.32                 |             |
| 7.31                 |             |
| 7.30                 |             |
| 7.28                 |             |
| 7.26                 |             |
| 5.10                 | 2.09        |
| 5.09                 | 2.09        |
| 4.08                 |             |

$^{13}\text{C}$  NMR spectrum of product **5g** in  $\text{CDCl}_3$  (101 MHz)

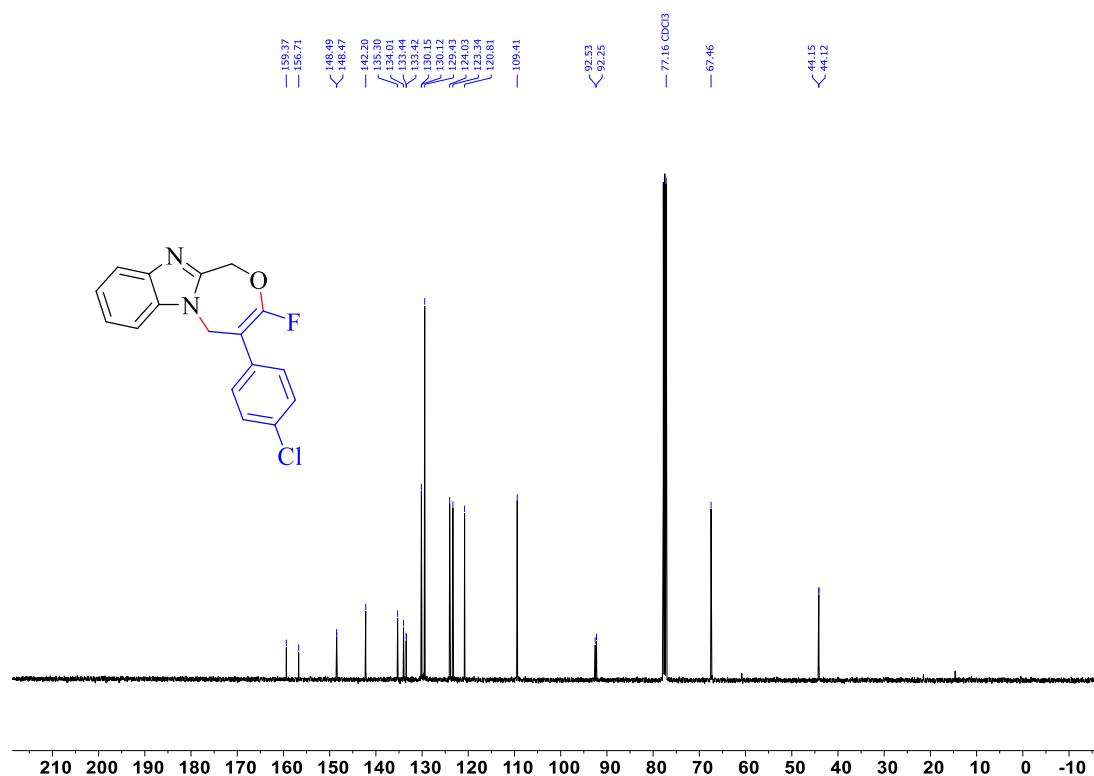

$^{19}\text{F}$ -NMR spectrum of product **5g** in  $\text{CDCl}_3$  (377 MHz)

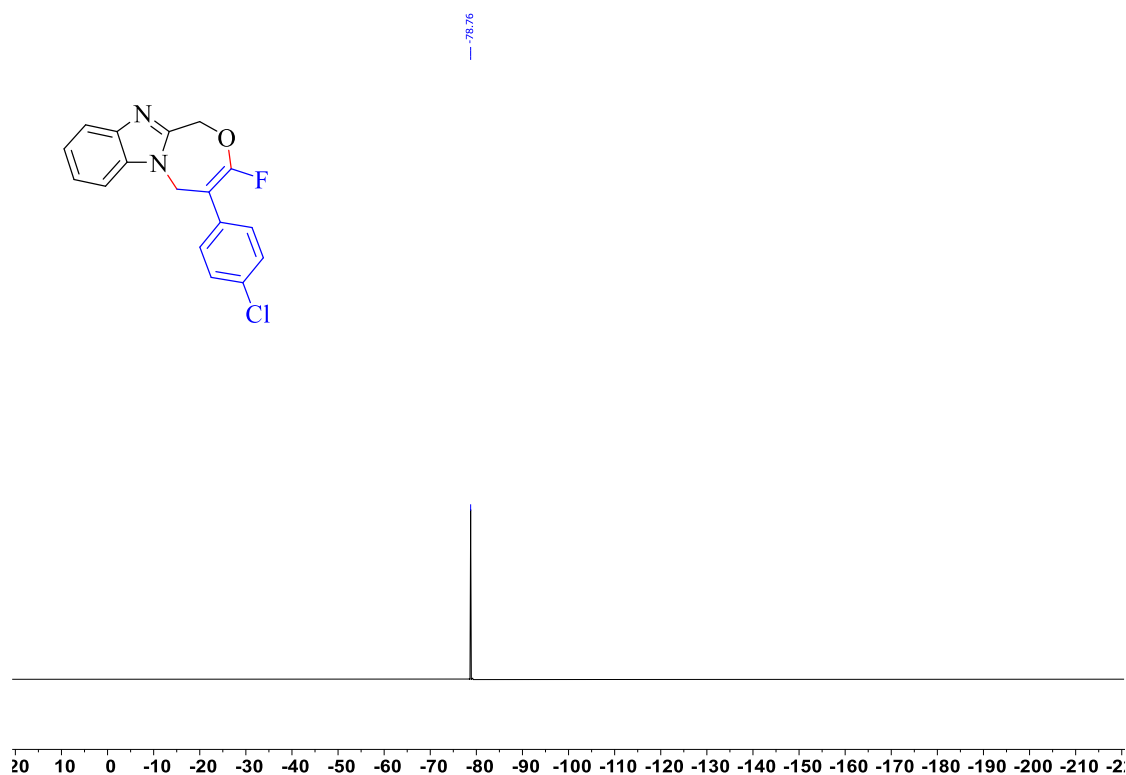

Chemical structure of 2-(4-bromophenyl)-2-fluoro-1,2,3,4-tetrahydro-1H-benzotriazin-5-yl ether is shown above the  $^1\text{H}$  NMR spectrum.

The  $^1\text{H}$  NMR spectrum (CDCl<sub>3</sub>) displays the following chemical shifts (ppm) and integration values:

| Chemical Shift (ppm) | Integration |
|----------------------|-------------|
| 7.81                 | 1.10        |
| 7.79                 | 2.29        |
| 7.79                 | 1.74        |
| 7.79                 | 1.17        |
| 7.79                 | 2.30        |
| 7.54                 |             |
| 7.53                 |             |
| 7.52                 |             |
| 7.39                 |             |
| 7.38                 |             |
| 7.38                 |             |
| 7.38                 |             |
| 7.36                 |             |
| 7.35                 |             |
| 7.33                 |             |
| 7.26                 |             |
| 7.26                 |             |
| 7.23                 |             |
| 7.22                 |             |
| 5.56                 | 2.00        |
| 5.04                 | 2.15        |
| 5.03                 |             |

$^{19}\text{F}$ -NMR spectrum of product **5h** in  $\text{CDCl}_3$  (565 MHz)

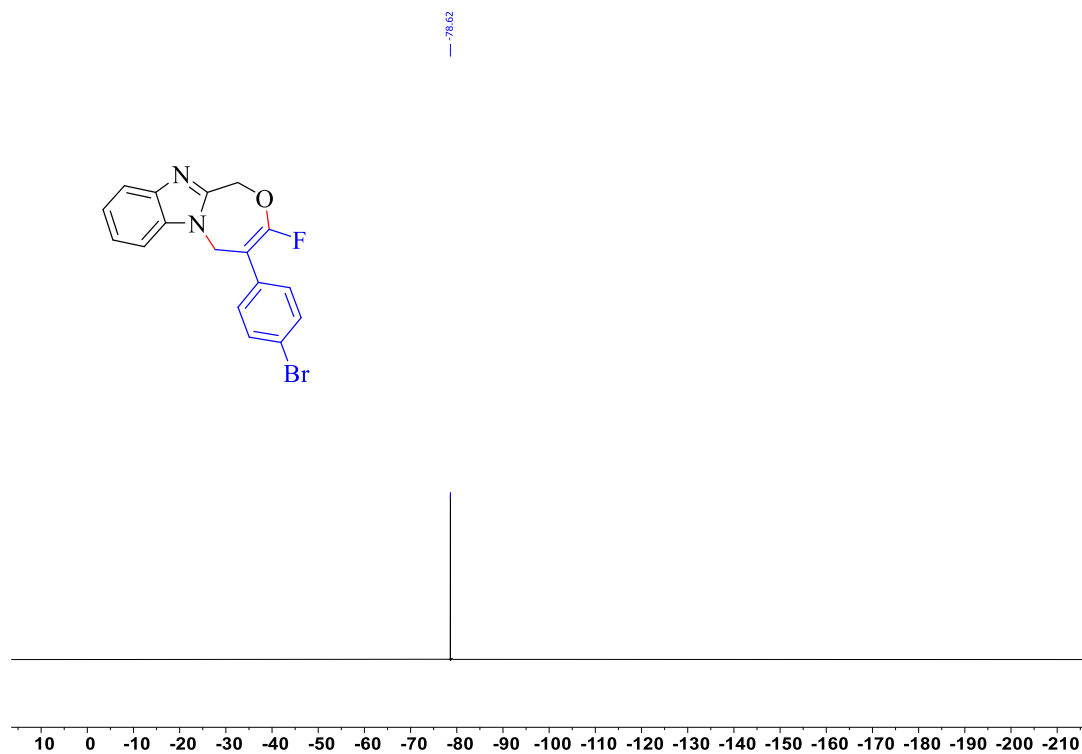

$^1\text{H}$  NMR spectrum of product **5i** in  $\text{CDCl}_3$  (400 MHz)

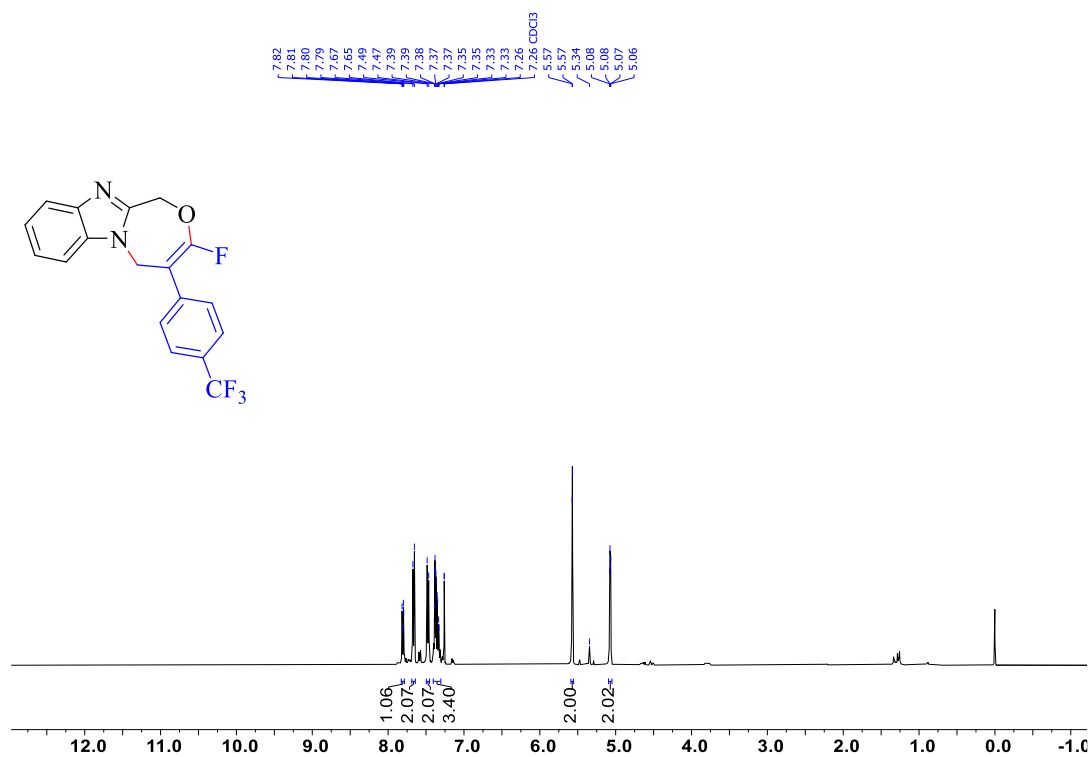



$^{13}\text{C}$  NMR spectrum of product **5i** in  $\text{CDCl}_3$  (151 MHz)

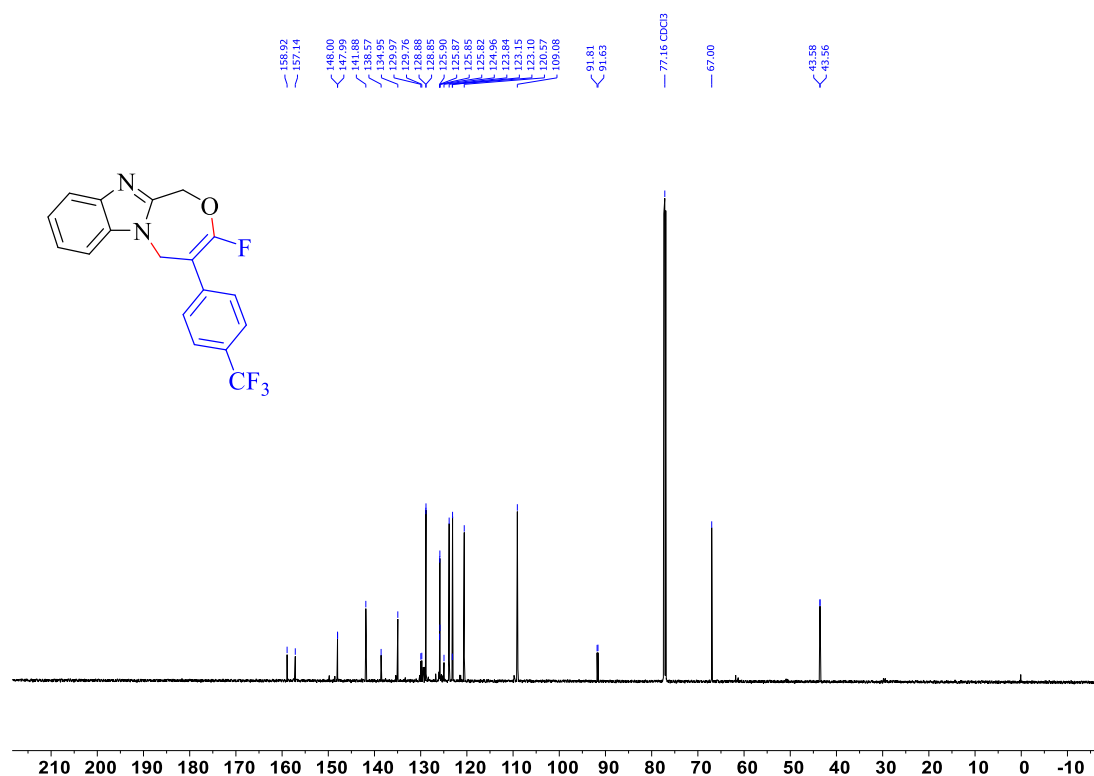

$^{19}\text{F}$ -NMR spectrum of product **5i** in  $\text{CDCl}_3$  (565 MHz)

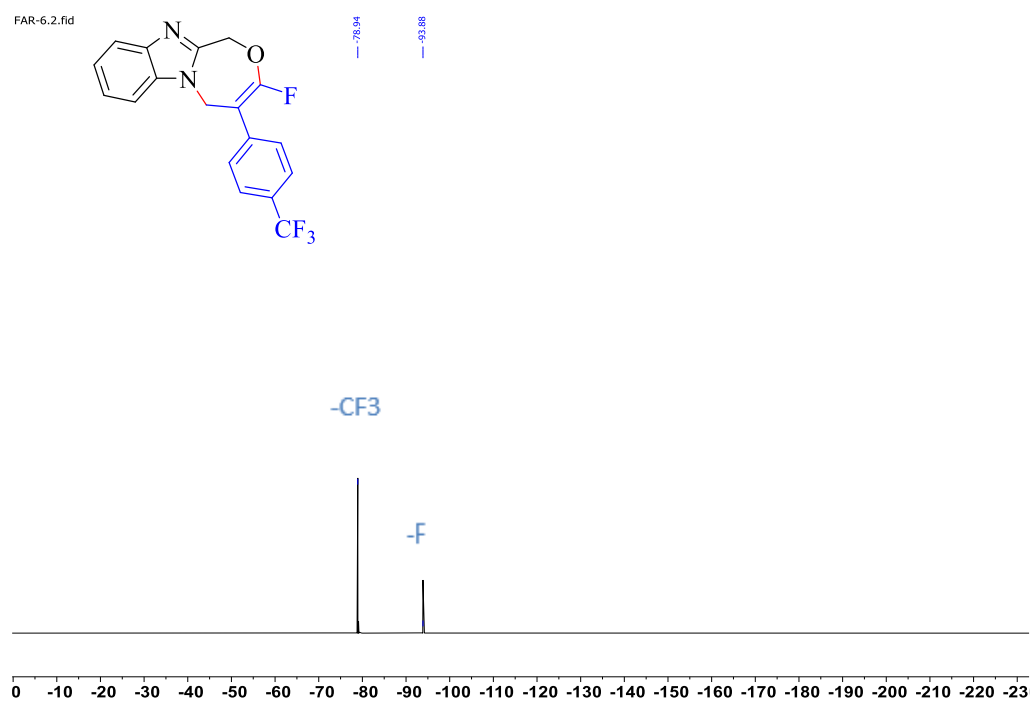

$^1\text{H}$  NMR spectrum of product **5j** in  $\text{CDCl}_3$  (600 MHz)

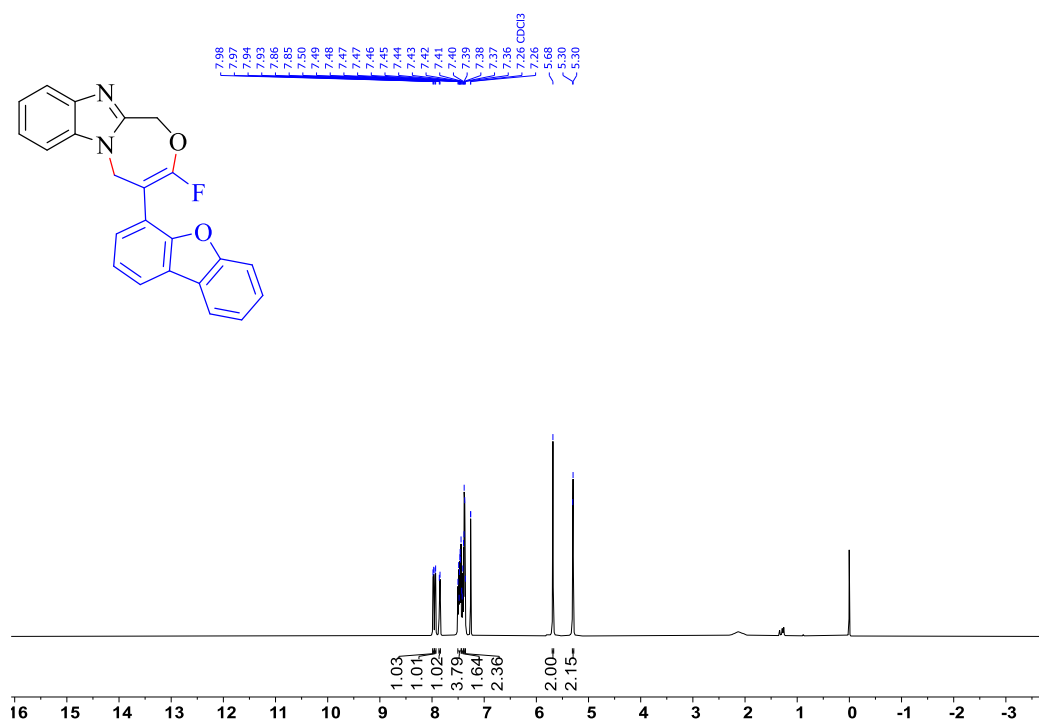

$^{19}\text{F}$ -NMR spectrum of product **5j** in  $\text{CDCl}_3$  (565 MHz)

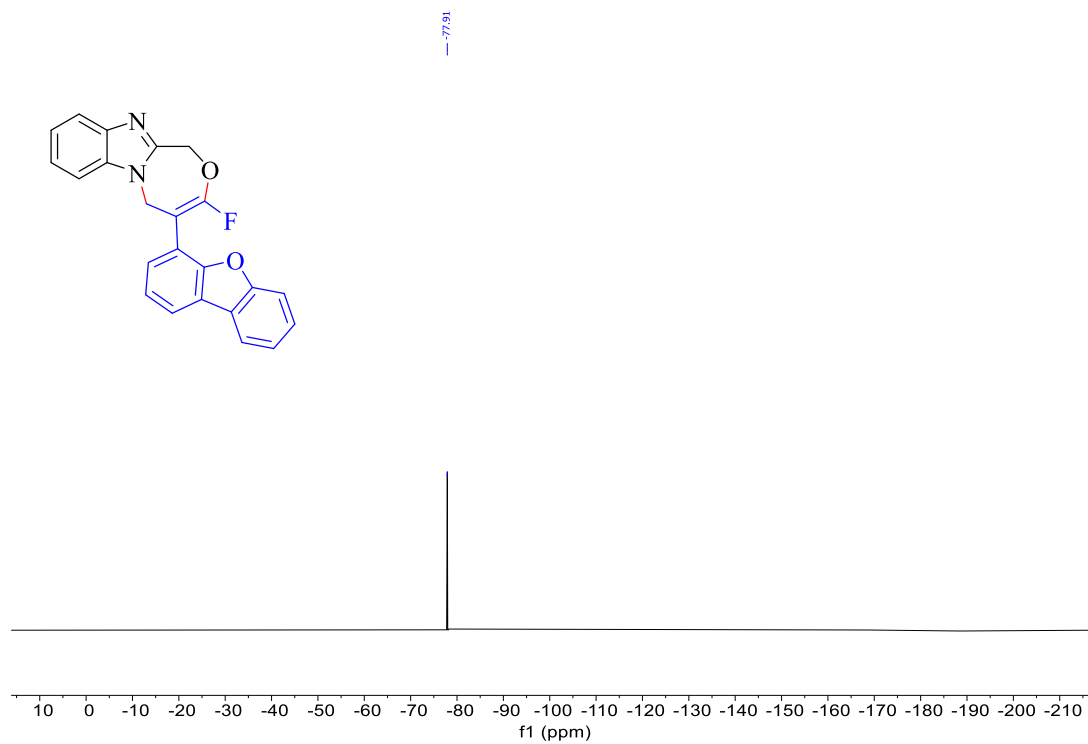

$^1\text{H}$  NMR spectrum of product **5k** in  $\text{CDCl}_3$  (600 MHz)

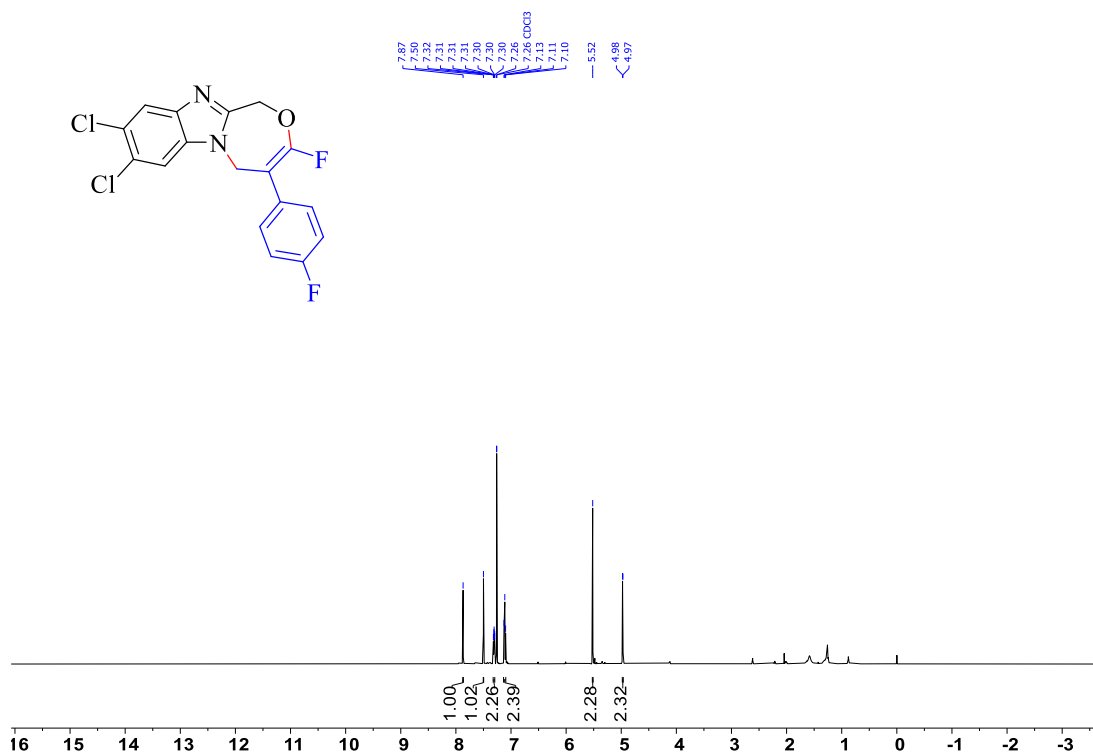

$^{13}\text{C}$  NMR spectrum of product **5k** in  $\text{CDCl}_3$  (151 MHz)

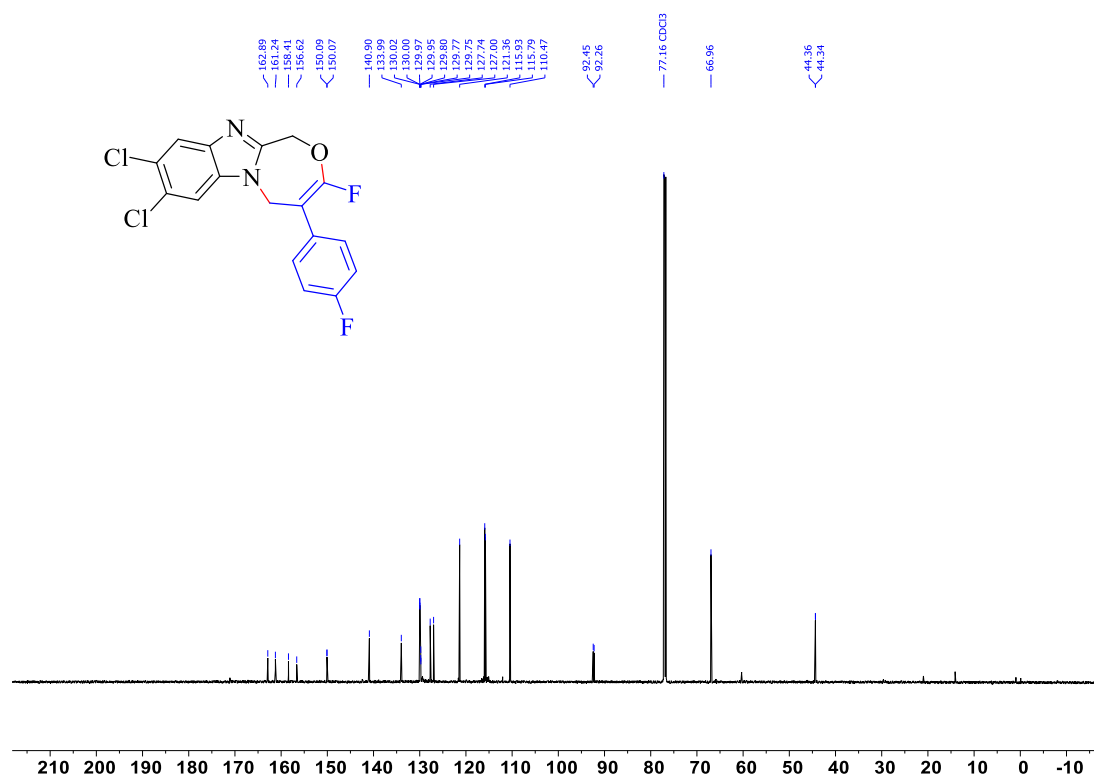

$^{19}\text{F}$ -NMR spectrum of product **5k** in  $\text{CDCl}_3$  (377 MHz)

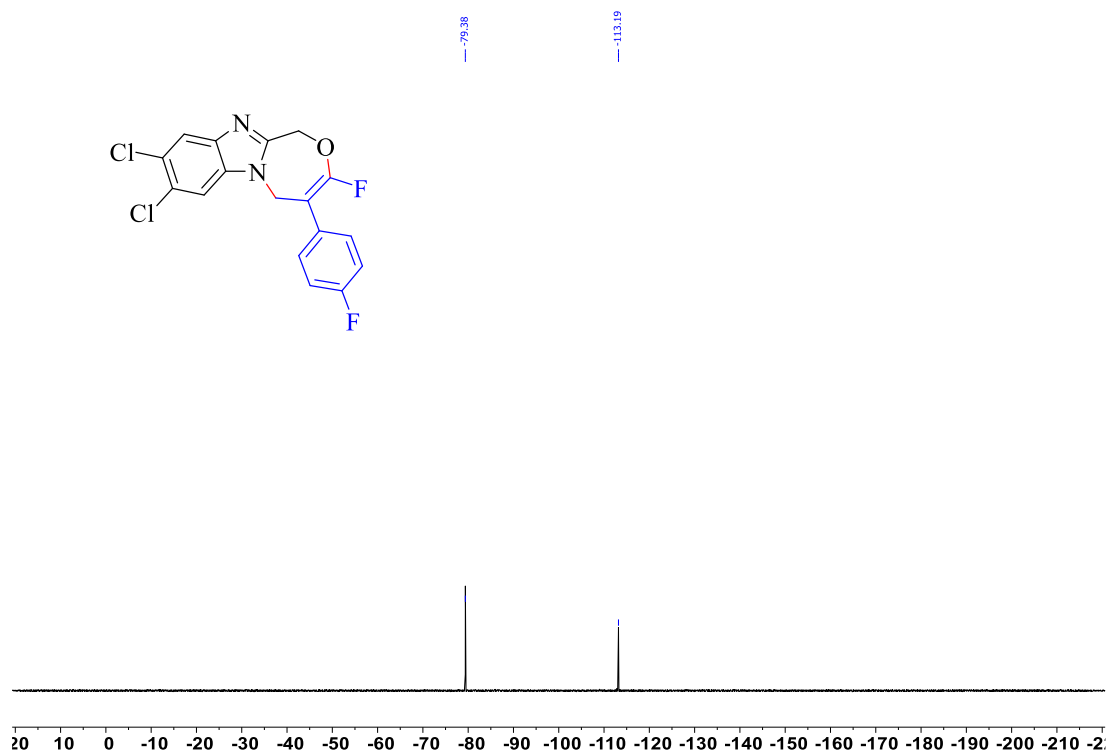

$^1\text{H}$  NMR spectrum of product **5I** in  $\text{CDCl}_3$  (600 MHz)

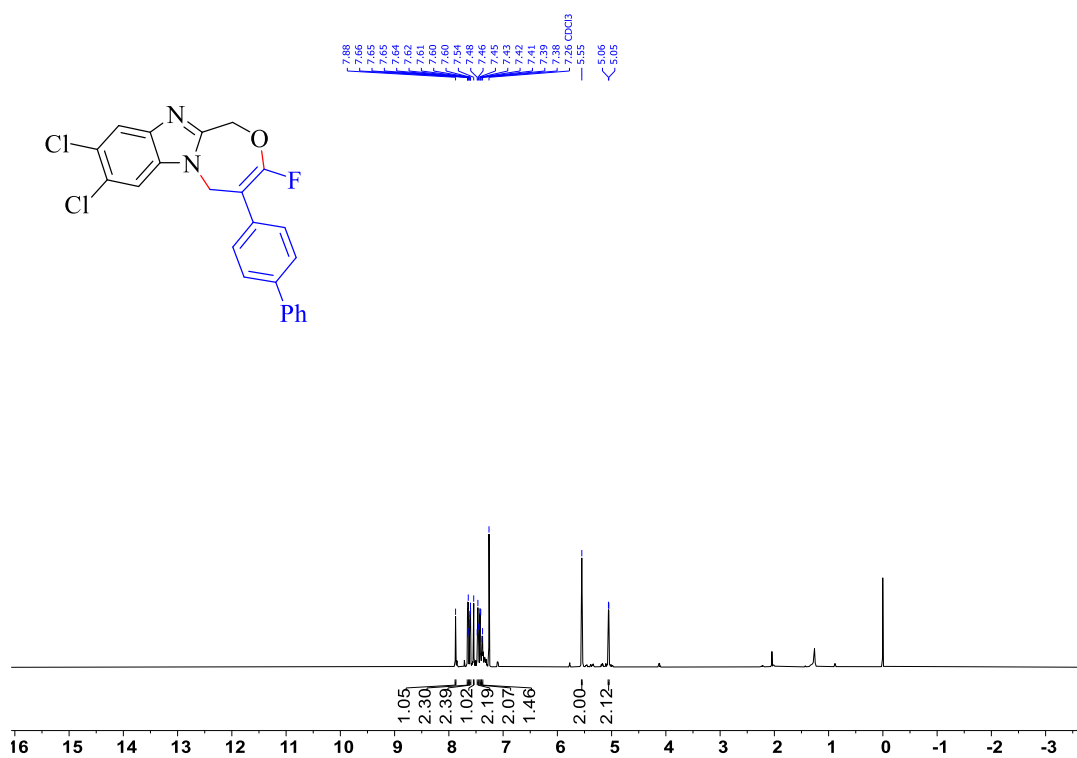

$^{13}\text{C}$  NMR spectrum of product **5I** in  $\text{CDCl}_3$  (151 MHz)

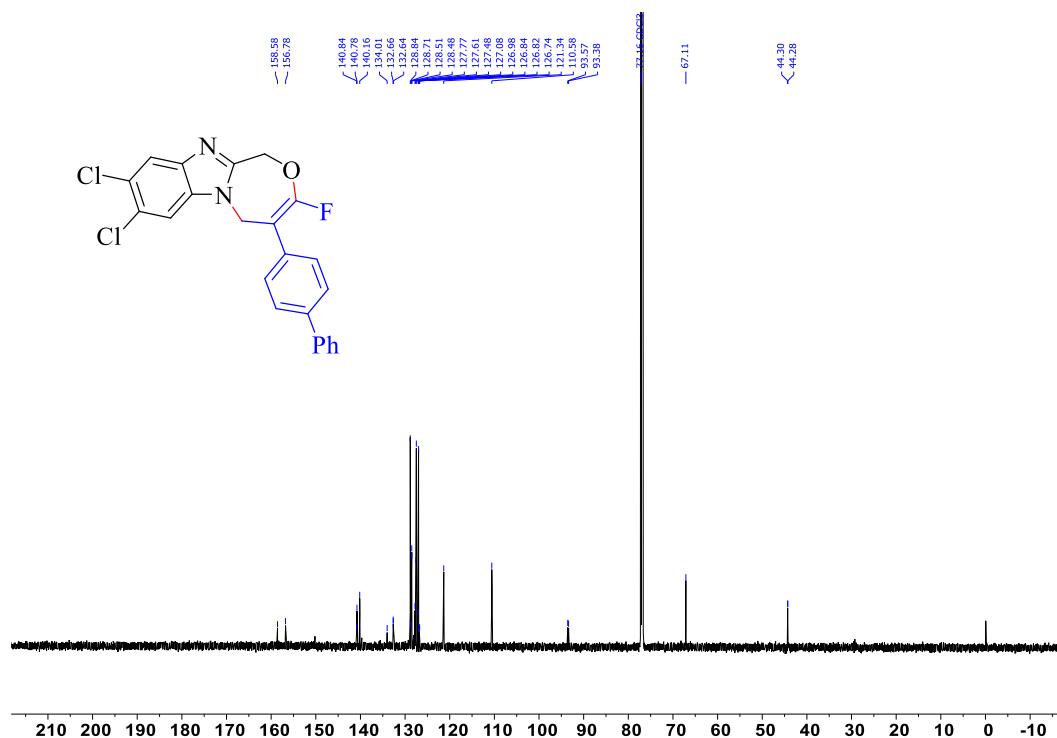

$^{19}\text{F}$ -NMR spectrum of product **5l** in  $\text{CDCl}_3$  (565 MHz)

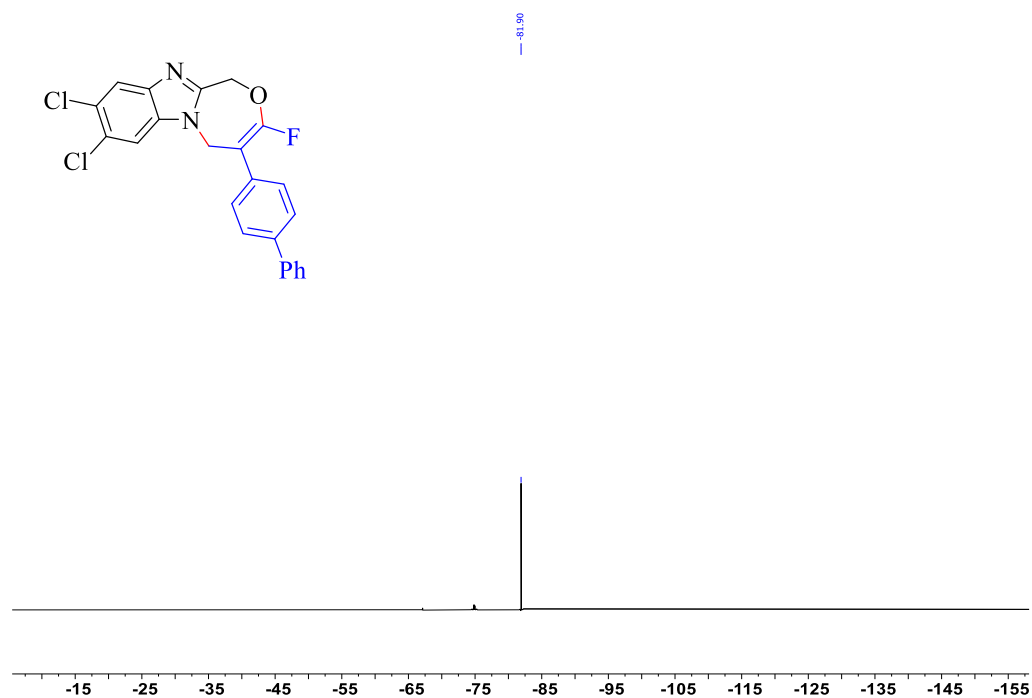

$^1\text{H}$  NMR spectrum of product **5m** in  $\text{CDCl}_3$  (600 MHz)

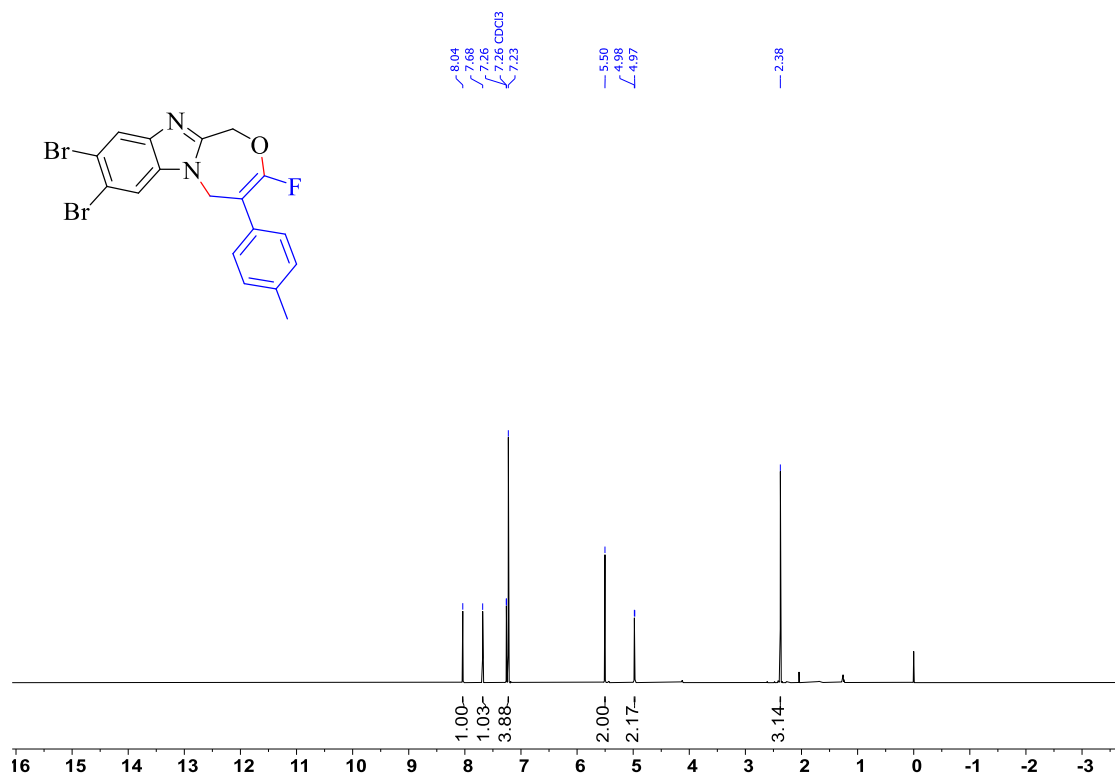

$^{13}\text{C}$  NMR spectrum of product **5m** in  $\text{CDCl}_3$  (151 MHz)

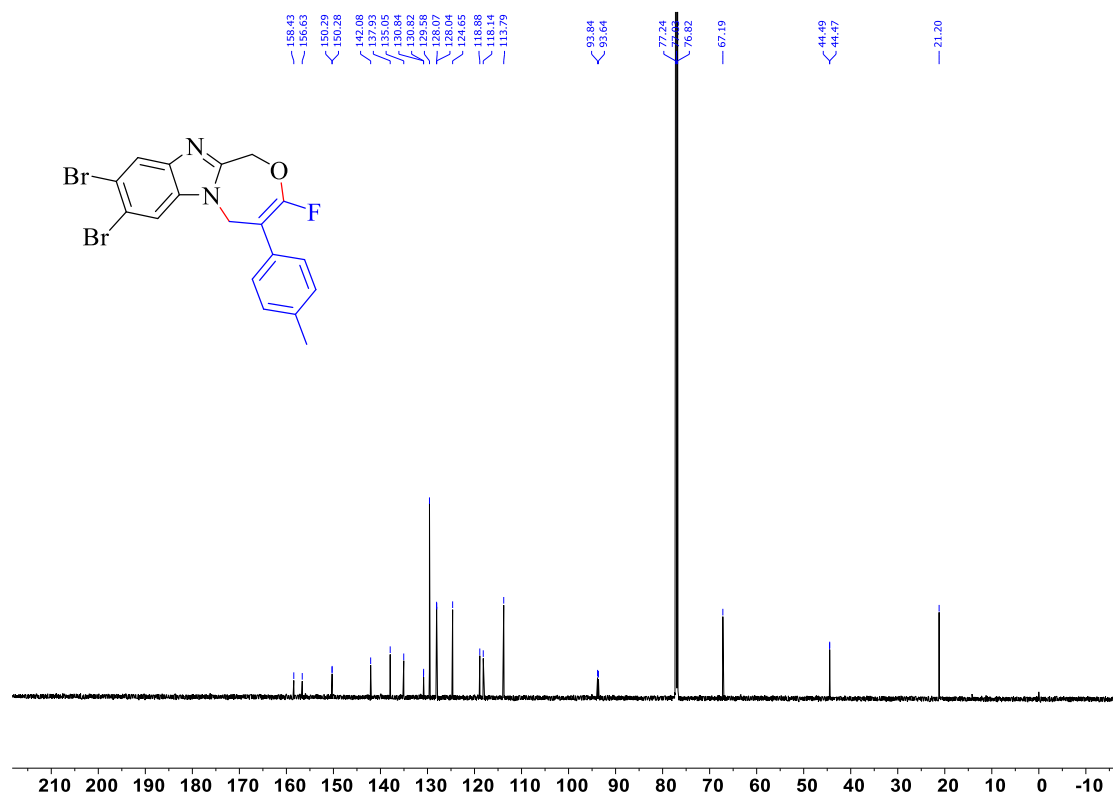

$^{19}\text{F}$ -NMR spectrum of product **5m** in  $\text{CDCl}_3$  (565 MHz)

far-30.2.fid

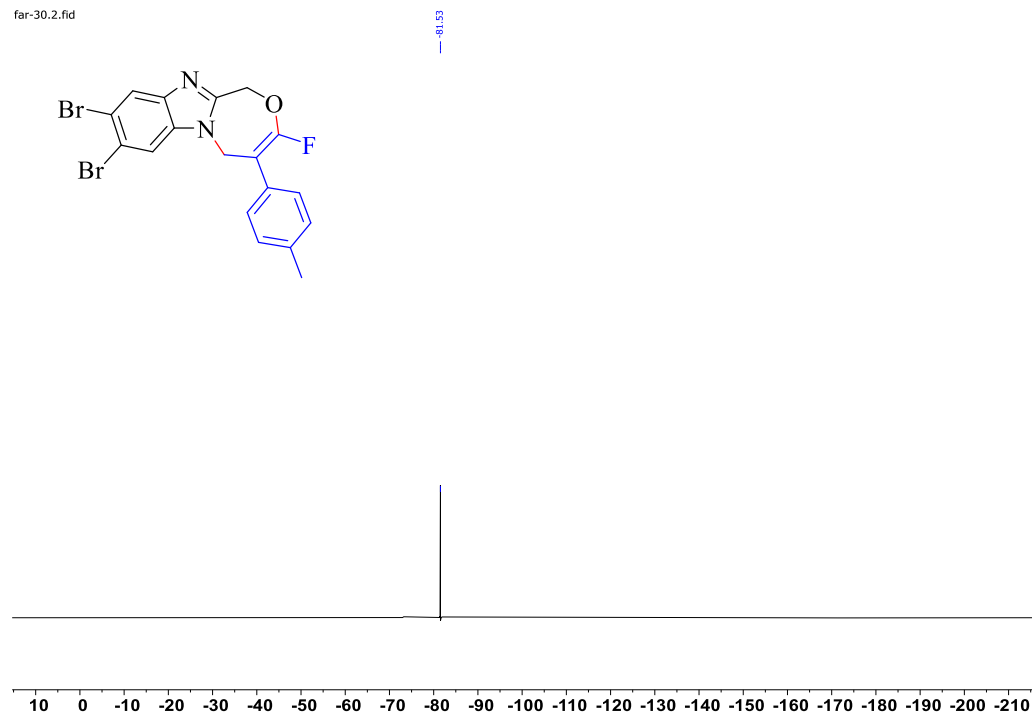

$^1\text{H}$  NMR spectrum of product **5n** in  $\text{CDCl}_3$  (600 MHz)

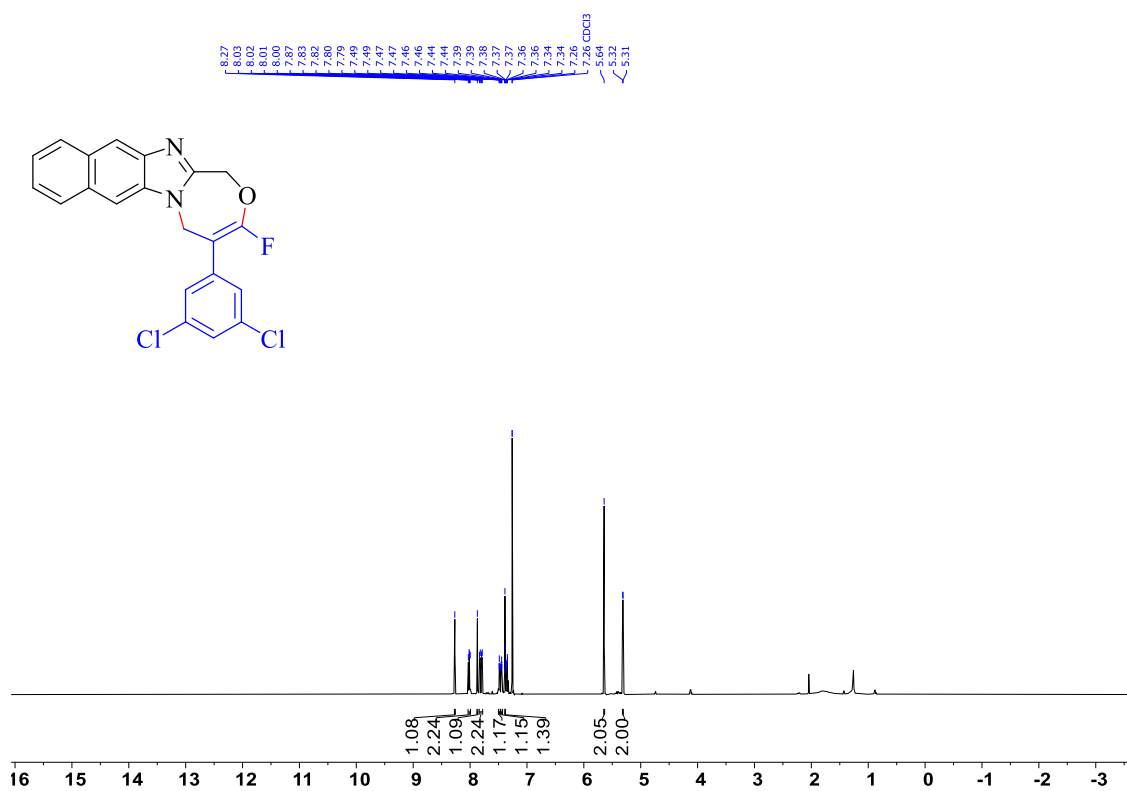

$^{13}\text{C}$  NMR spectrum of product **5n** in  $\text{CDCl}_3$  (101 MHz)

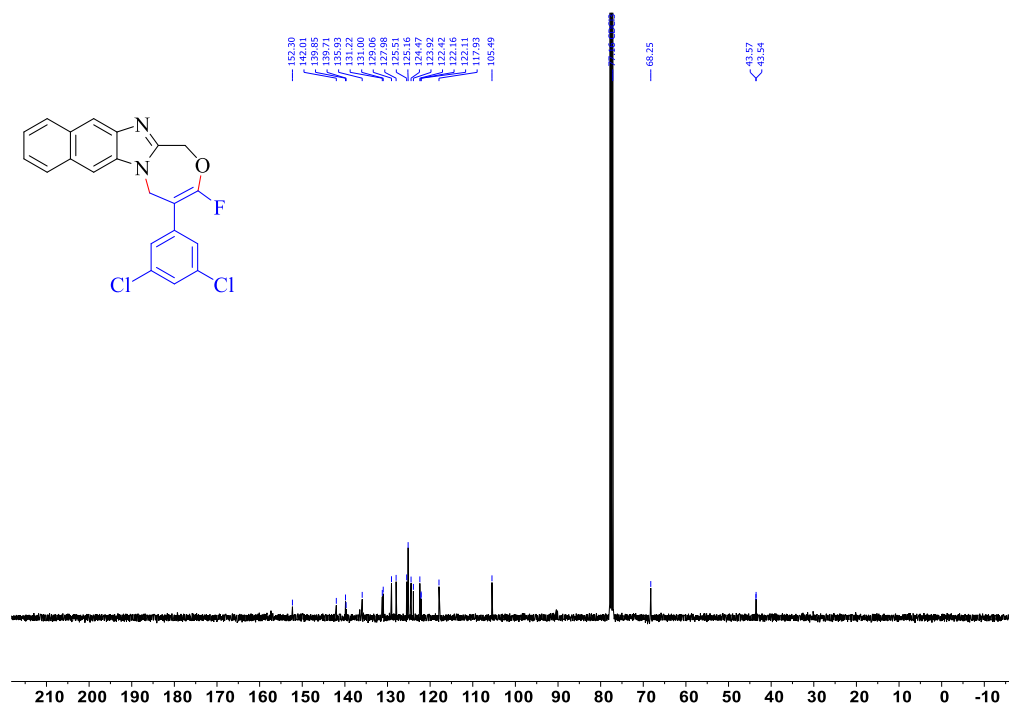



Chemical structure of 2-(2,4-dichlorophenyl)-2-fluoro-1-(2,3-benzoxazol-5-yl)ethanol (10) is shown. The structure features a benzoxazole ring system connected to a 2,4-dichlorophenyl group via a 2-fluoroethyl linker.

The <sup>13</sup>C NMR spectrum (CDCl<sub>3</sub>) shows a single peak at δ 71.05, corresponding to the methylene carbons of the 2-fluoroethyl linker.

Chemical structure: COc1ccc(cc1)C(F)=C2C(=N1c2cc3ccccc3n1)CO

<sup>1</sup>H NMR spectrum (CDCl<sub>3</sub>) showing peaks from 3.83 to 8.24 ppm. Integration values are provided below the baseline: 1.02, 1.08, 1.06, 0.95, 2.35, 2.02, 1.97, 2.00, 2.00, 3.22.

$^{13}\text{C}$  NMR spectrum of product **5o** in  $\text{CDCl}_3$  (101 MHz)

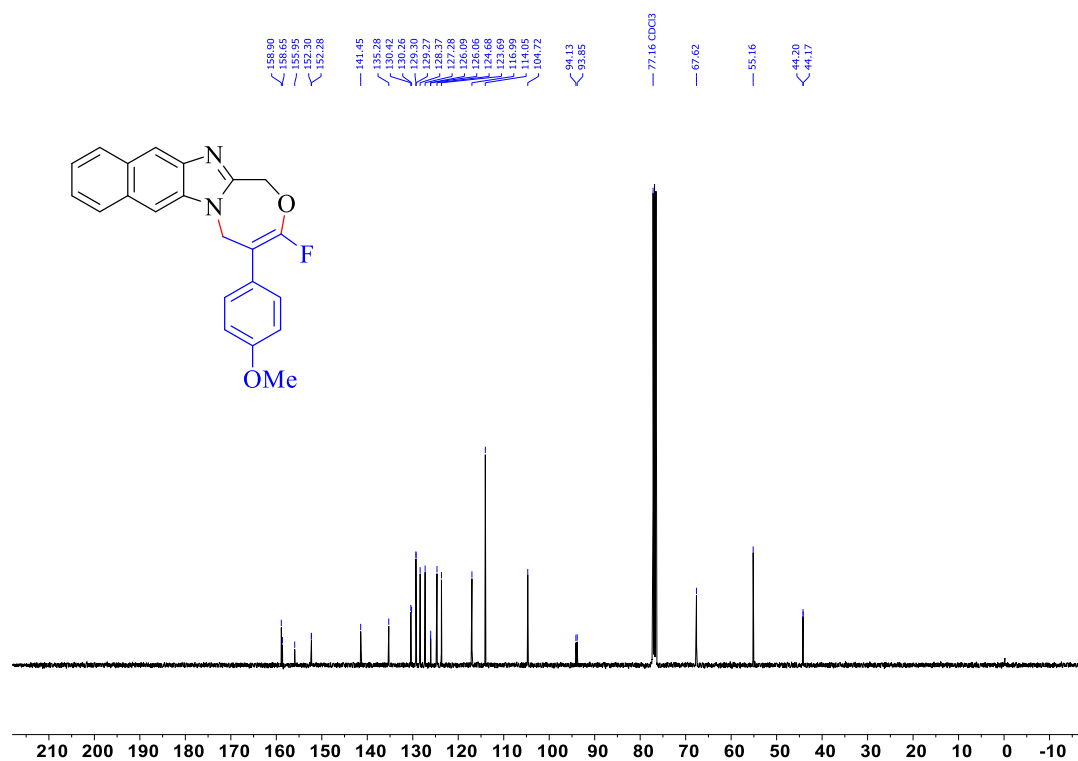

$^{19}\text{F}$ -NMR spectrum of product **5o** in  $\text{CDCl}_3$  (377 MHz)

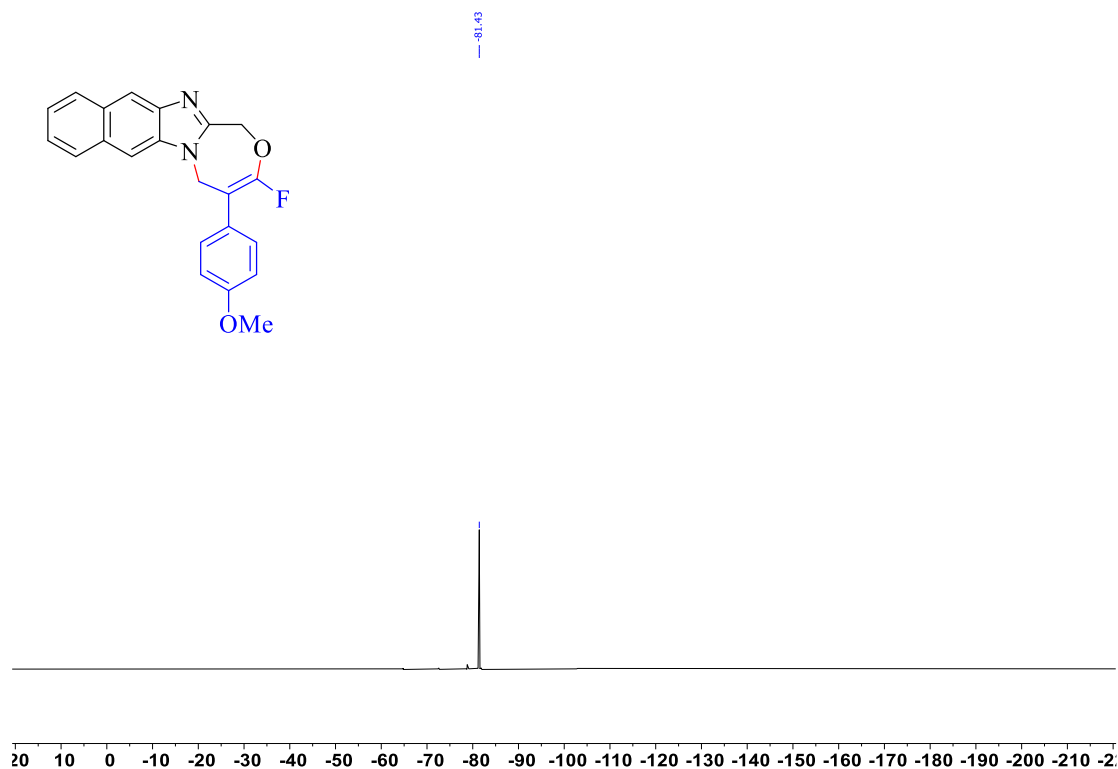

$^1\text{H}$  NMR spectrum of product **7a** in  $\text{CDCl}_3$  (600 MHz)

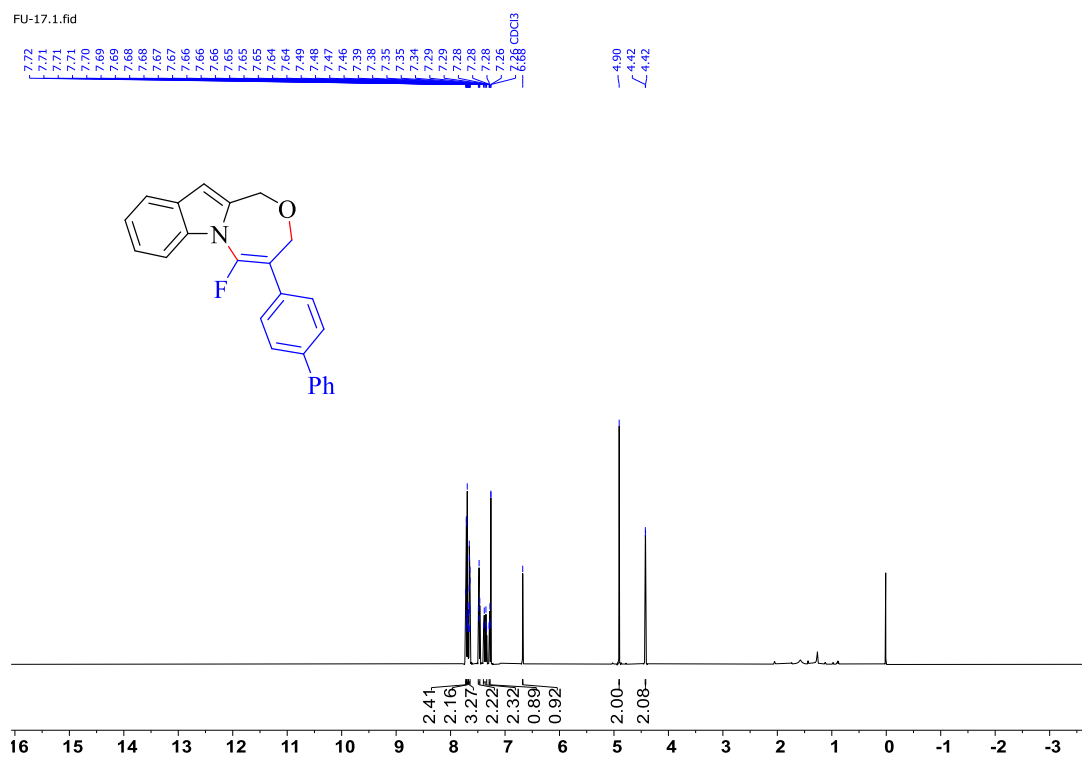

$^{13}\text{C}$  NMR spectrum of product **7a** in  $\text{CDCl}_3$  (151 MHz)

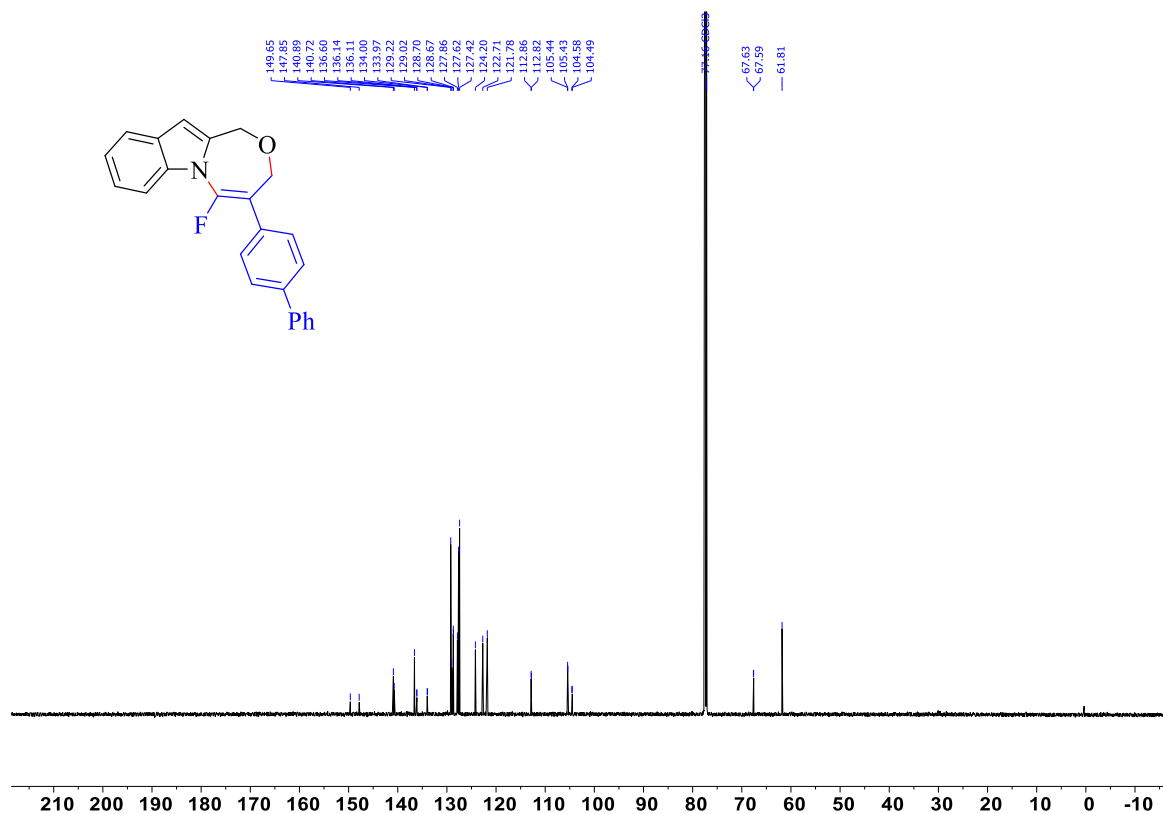

$^{19}\text{F}$ -NMR spectrum of product **7a** in  $\text{CDCl}_3$  (565 MHz)

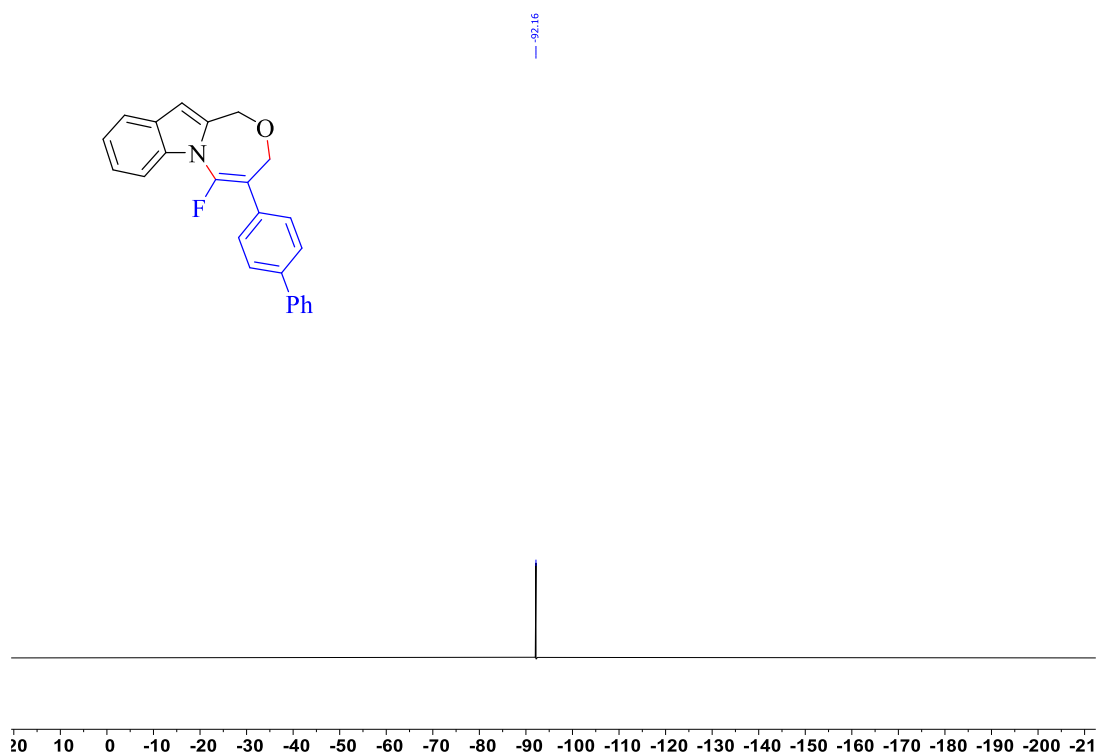

$^1\text{H}$  NMR spectrum of product **7b** in  $\text{CDCl}_3$  (600 MHz)

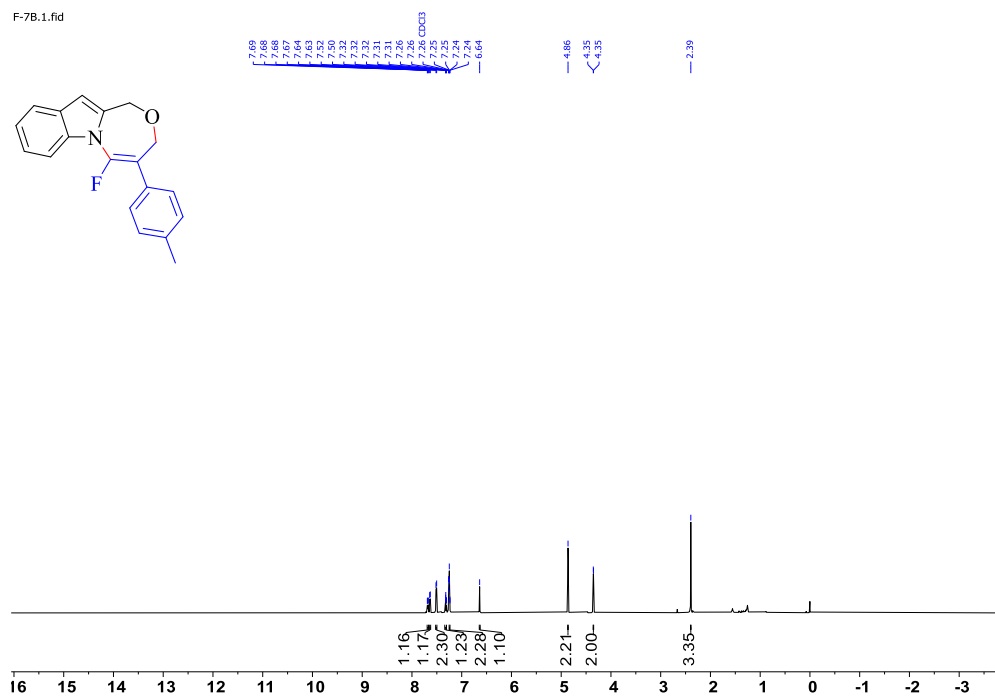

$^{13}\text{C}$  NMR spectrum of product **7b** in  $\text{CDCl}_3$  (151 MHz)

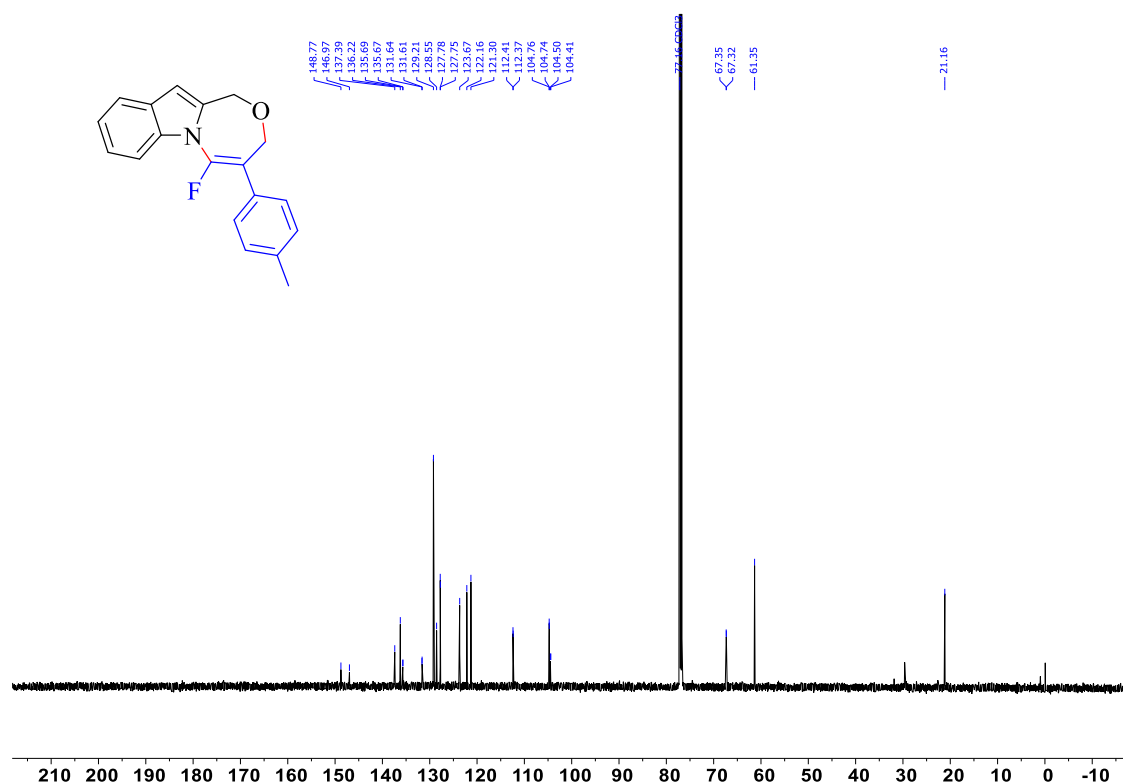

$^{19}\text{F}$ -NMR spectrum of product **7b** in  $\text{CDCl}_3$  (565 MHz)

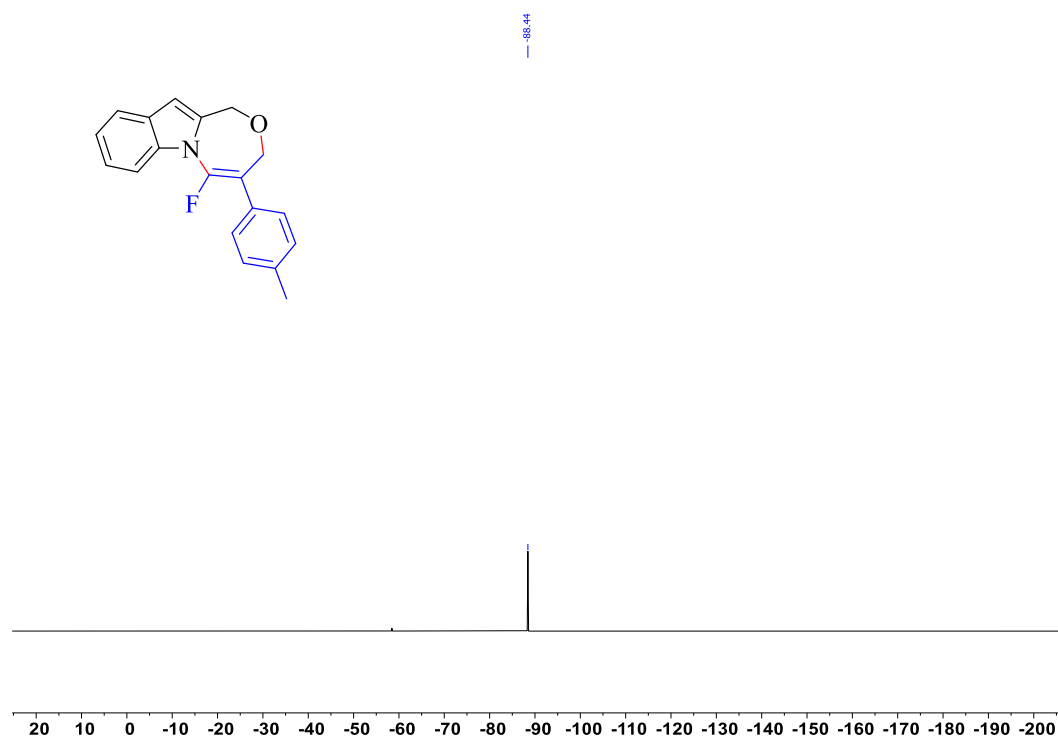

Chemical structure: COc1ccc(cc1)C(F)=C2C(=CN2Cc3ccccc3)O

<sup>1</sup>H NMR spectrum (CDCl<sub>3</sub>) data:

| Chemical Shift (ppm) | Integration |
|----------------------|-------------|
| 7.70                 | 1.18        |
| 7.69                 |             |
| 7.69                 |             |
| 7.68                 |             |
| 7.68                 |             |
| 7.67                 | 2.50        |
| 7.65                 |             |
| 7.65                 | 1.26        |
| 7.64                 |             |
| 7.57                 | 2.44        |
| 7.56                 |             |
| 7.55                 | 0.97        |
| 7.55                 |             |
| 7.34                 | 1.18        |
| 7.33                 |             |
| 7.33                 | 2.30        |
| 7.32                 |             |
| 7.27                 | 2.06        |
| 7.26                 |             |
| 7.26                 | 3.45        |
| 7.25                 |             |
| 7.25                 |             |
| 6.99                 |             |
| 6.99                 |             |
| 6.98                 |             |
| 6.65                 |             |
| 4.87                 |             |
| 4.87                 |             |
| 4.35                 |             |
| 4.35                 |             |
| 3.86                 |             |

Chemical structure of 2-(4-methoxyphenyl)-2-fluoro-1,2,3,4-tetrahydro-1H-benzobis[1,2,4]oxazole is shown. The <sup>13</sup>C NMR spectrum (CDCl<sub>3</sub>) displays the following chemical shifts (ppm):

- 158.91
- 148.41
- 146.61
- 136.20
- 134.65
- 132.67
- 129.13
- 129.10
- 128.53
- 128.48
- 126.84
- 123.64
- 122.13
- 121.29
- 118.77
- 112.37
- 112.34
- 104.66
- 104.55
- 104.27
- 104.18
- 77.16 (CDCl<sub>3</sub>)
- 67.36
- 67.32
- 61.34
- 55.29

$^{19}\text{F}$ -NMR spectrum of product **7c** in  $\text{CDCl}_3$  (565 MHz)

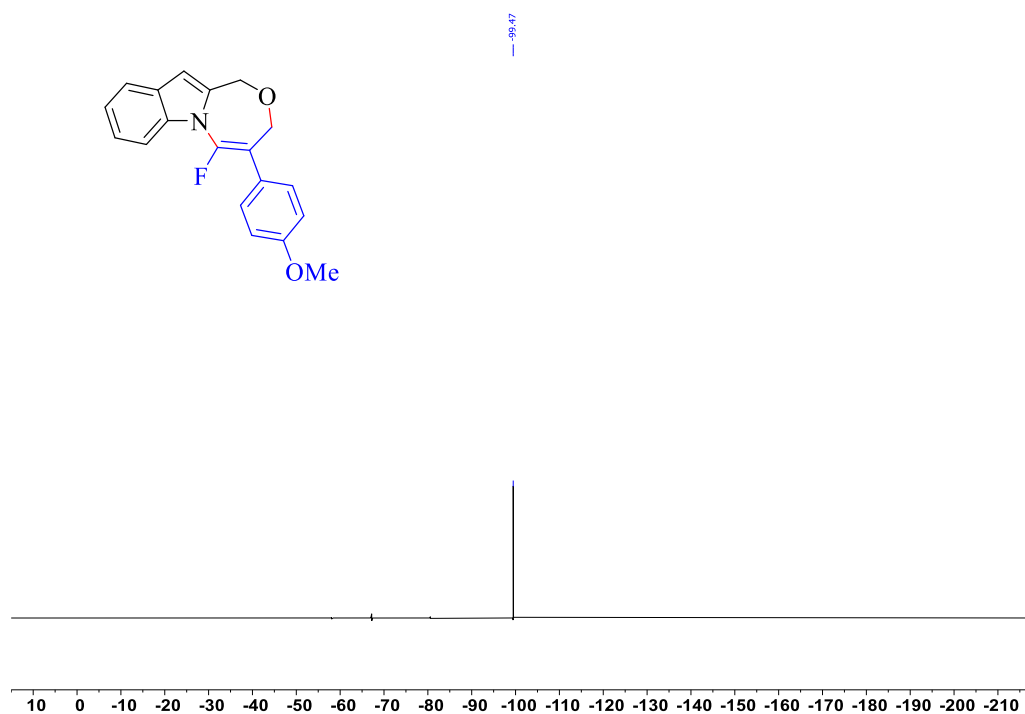

$^1\text{H}$  NMR spectrum of product **7d** in  $\text{CDCl}_3$  (600 MHz)

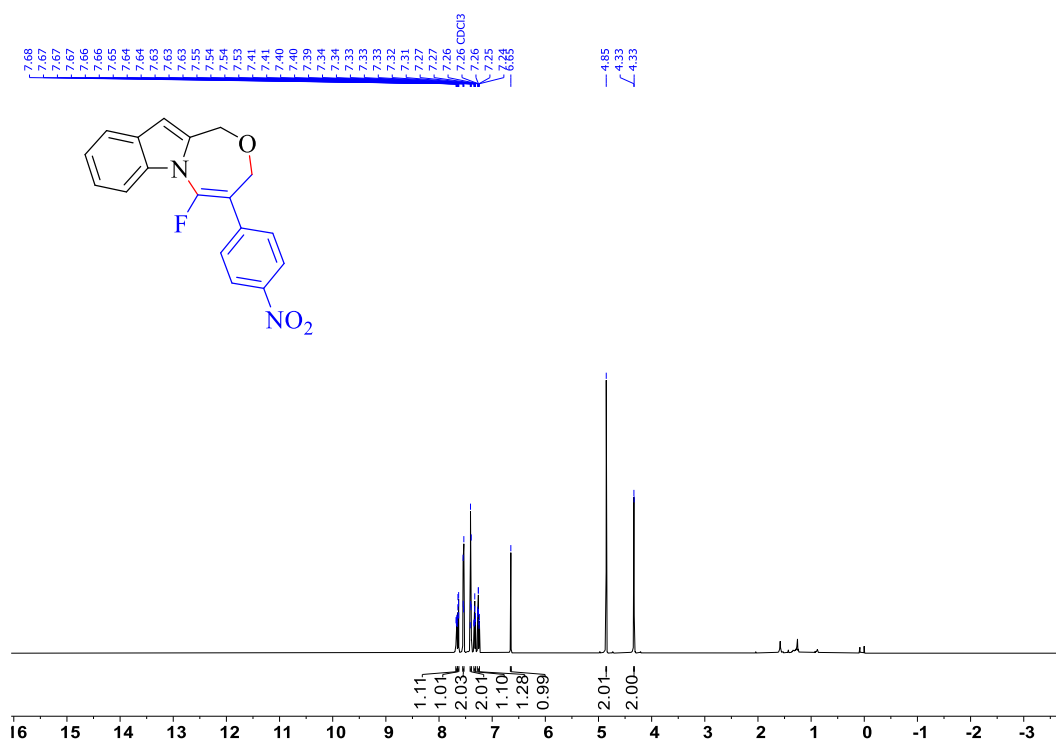

$^{13}\text{C}$  NMR spectrum of product **7d** in  $\text{CDCl}_3$  (151 MHz)

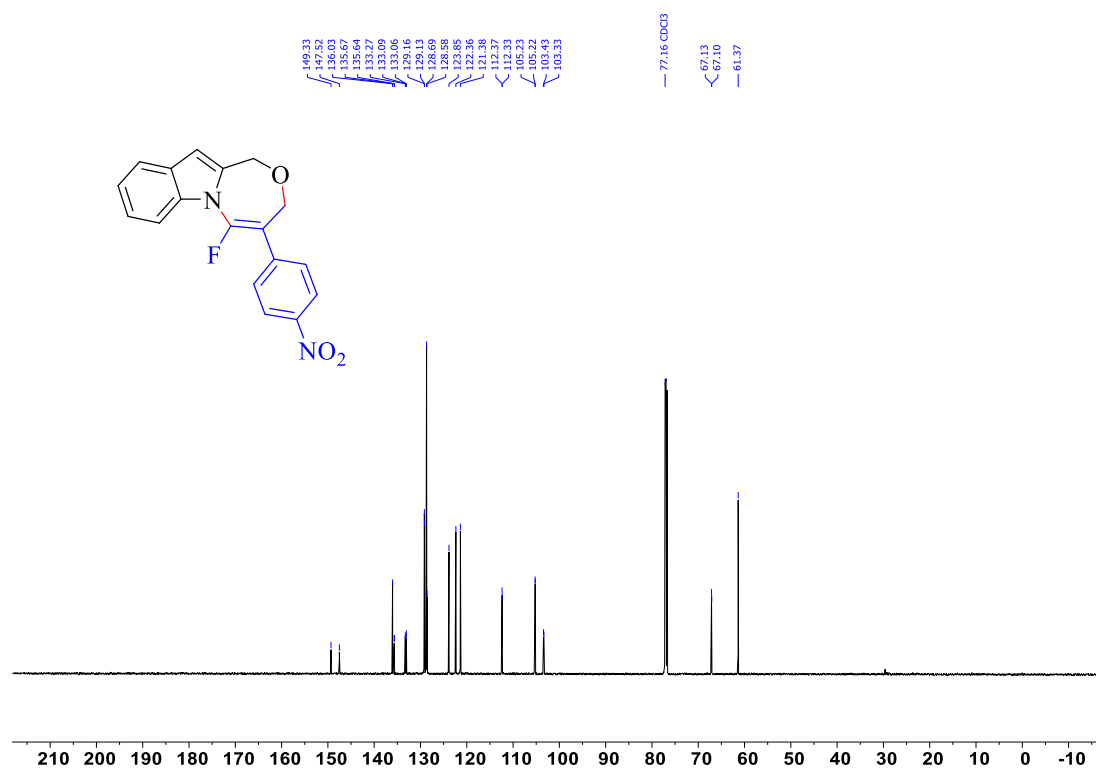

$^{19}\text{F}$ -NMR spectrum of product **7d** in  $\text{CDCl}_3$  (565 MHz)

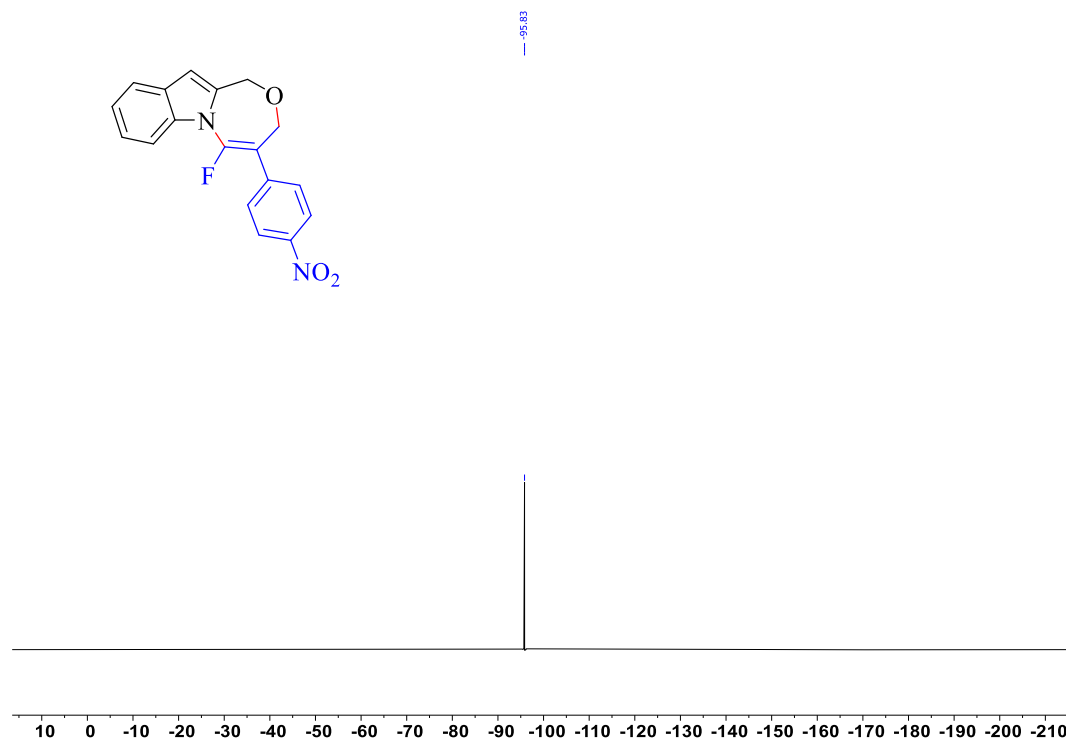



$^1\text{H}$  NMR spectrum of product **7e** in  $\text{CDCl}_3$  (600 MHz)

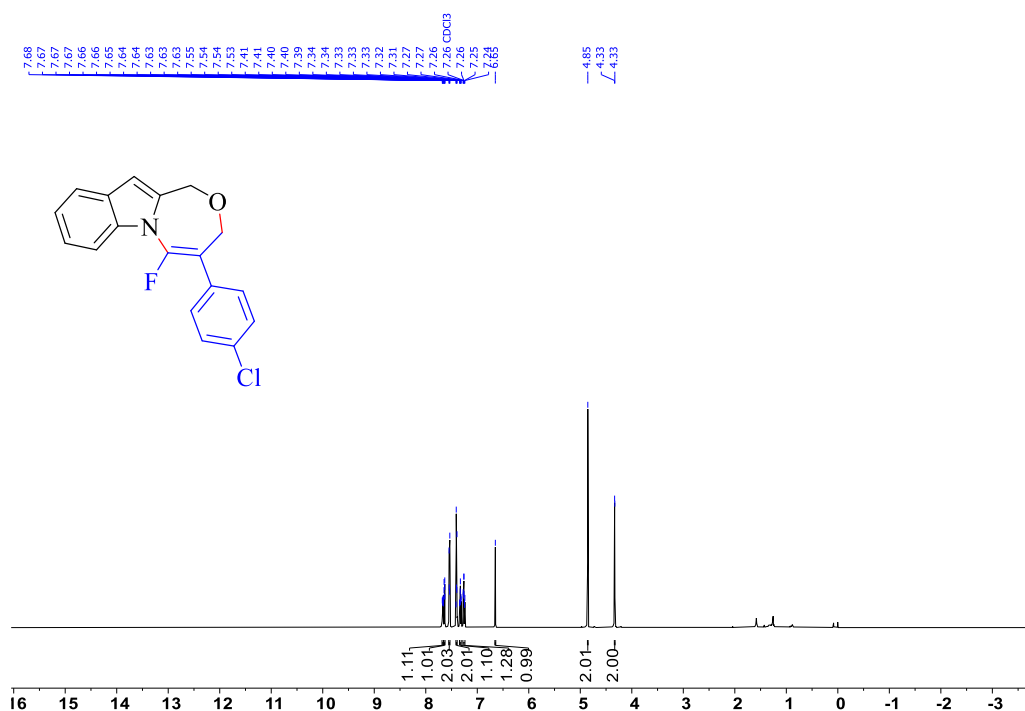

$^{13}\text{C}$  NMR spectrum of product **7e** in  $\text{CDCl}_3$  (151 MHz)

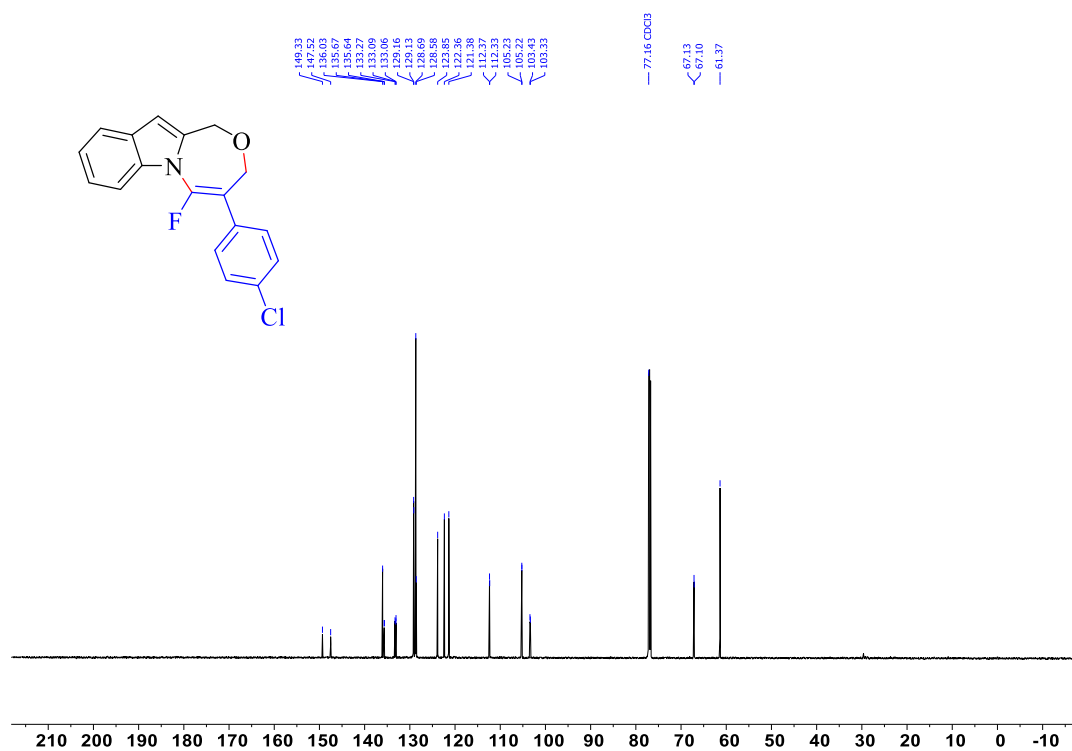

$^{19}\text{F}$ -NMR spectrum of product **7e** in  $\text{CDCl}_3$  (565 MHz)

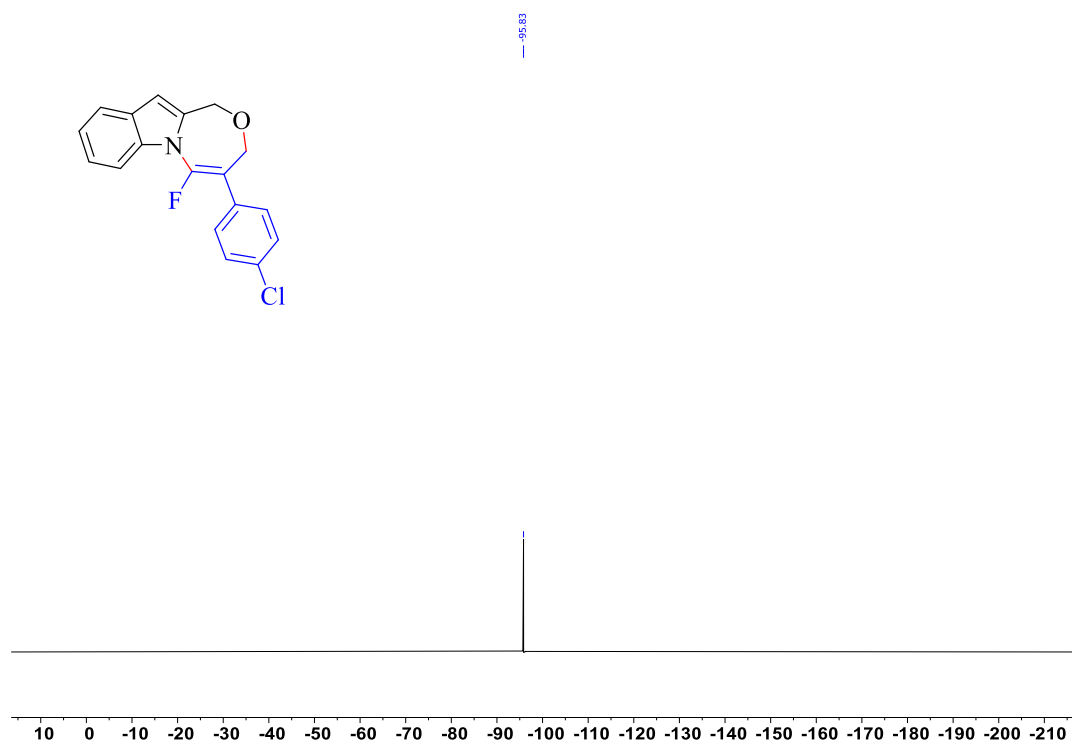

$^1\text{H}$  NMR spectrum of product **7f** in  $\text{CDCl}_3$  (600 MHz)

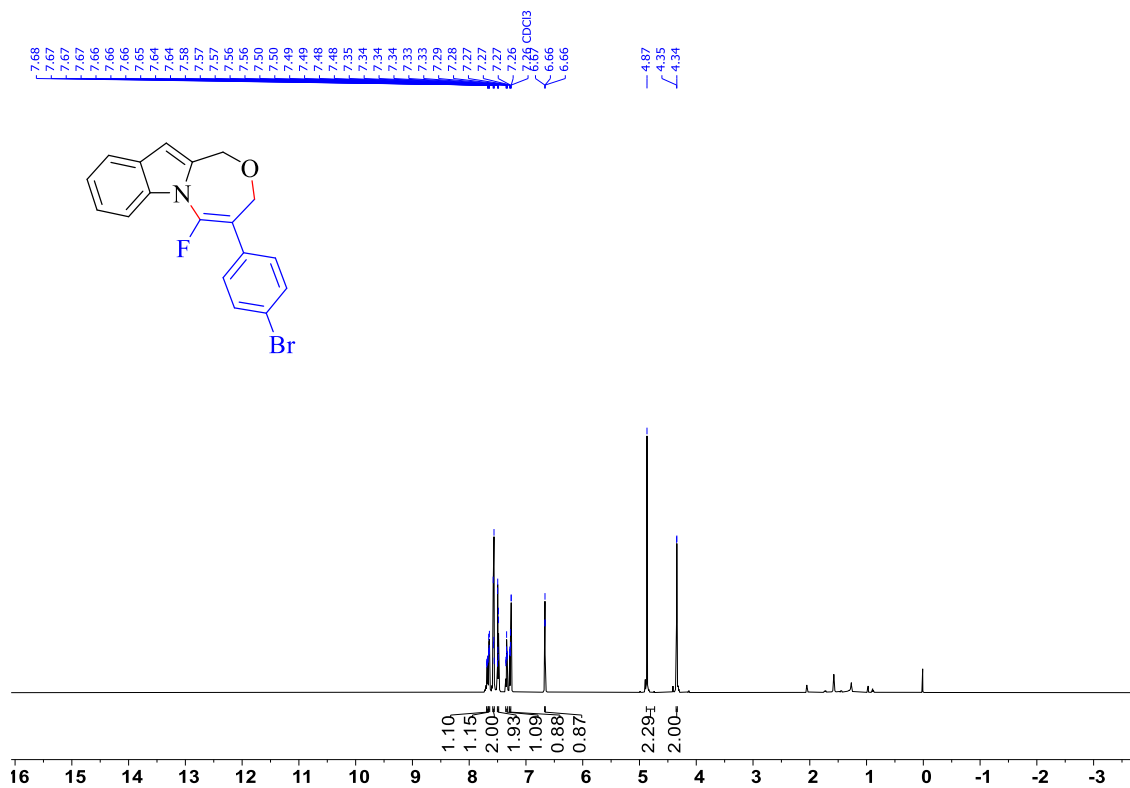

$^{13}\text{C}$  NMR spectrum of product **7f** in  $\text{CDCl}_3$  (151 MHz)

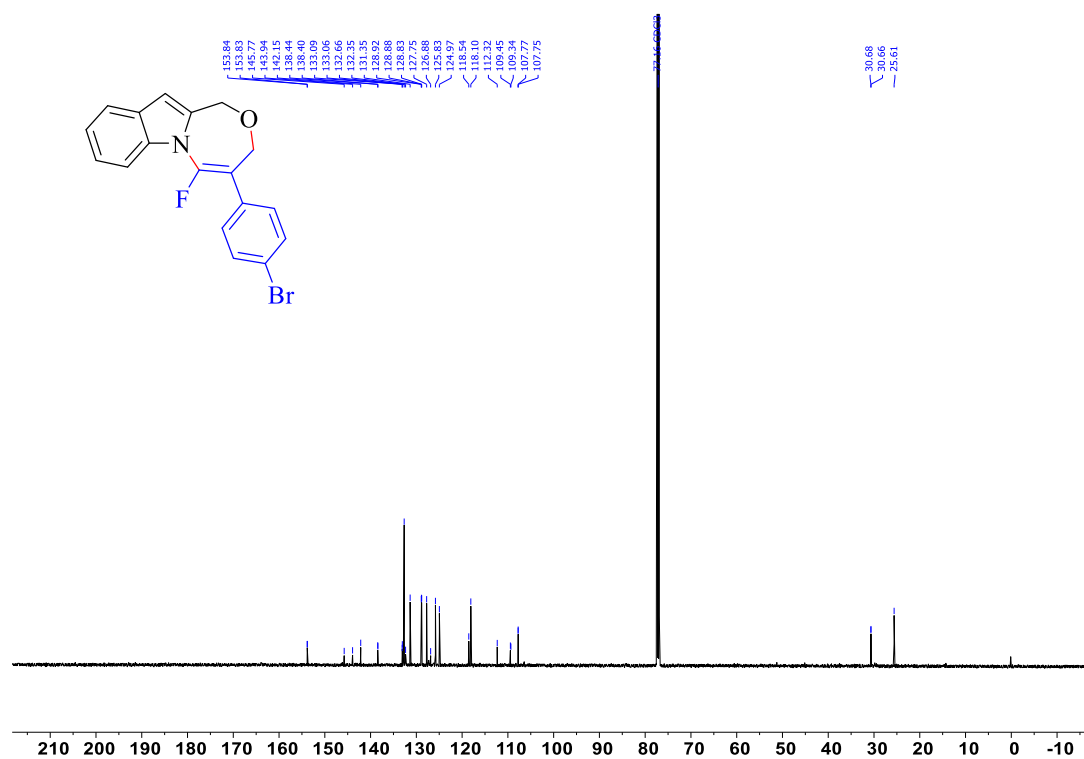

$^{19}\text{F}$ -NMR spectrum of product **7f** in  $\text{CDCl}_3$  (565 MHz)

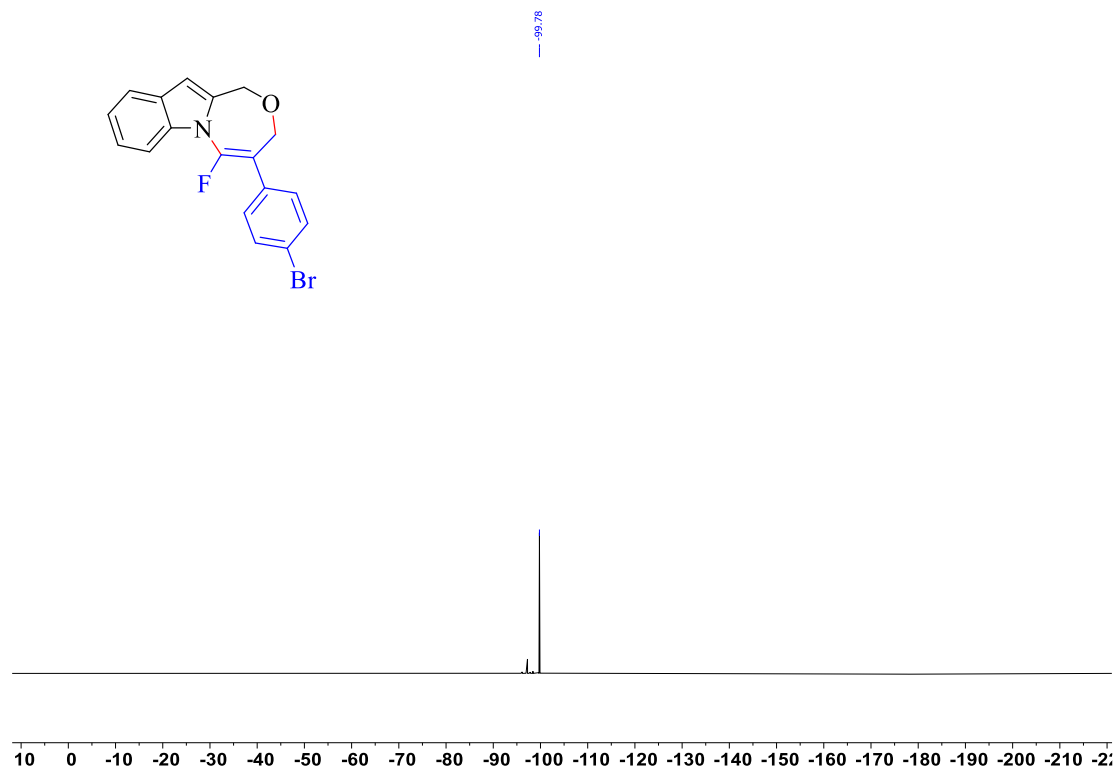

$^1\text{H}$  NMR spectrum of product **7g** in  $\text{CDCl}_3$  (600 MHz)

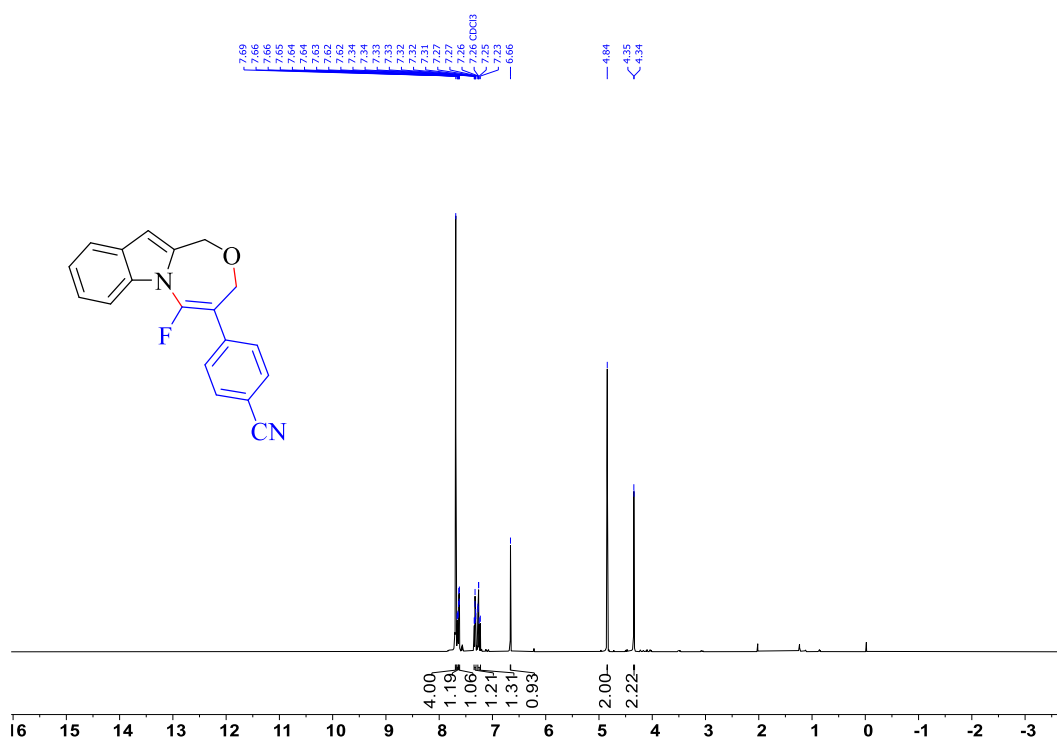

$^{13}\text{C}$  NMR spectrum of product **7g** in  $\text{CDCl}_3$  (151 MHz)

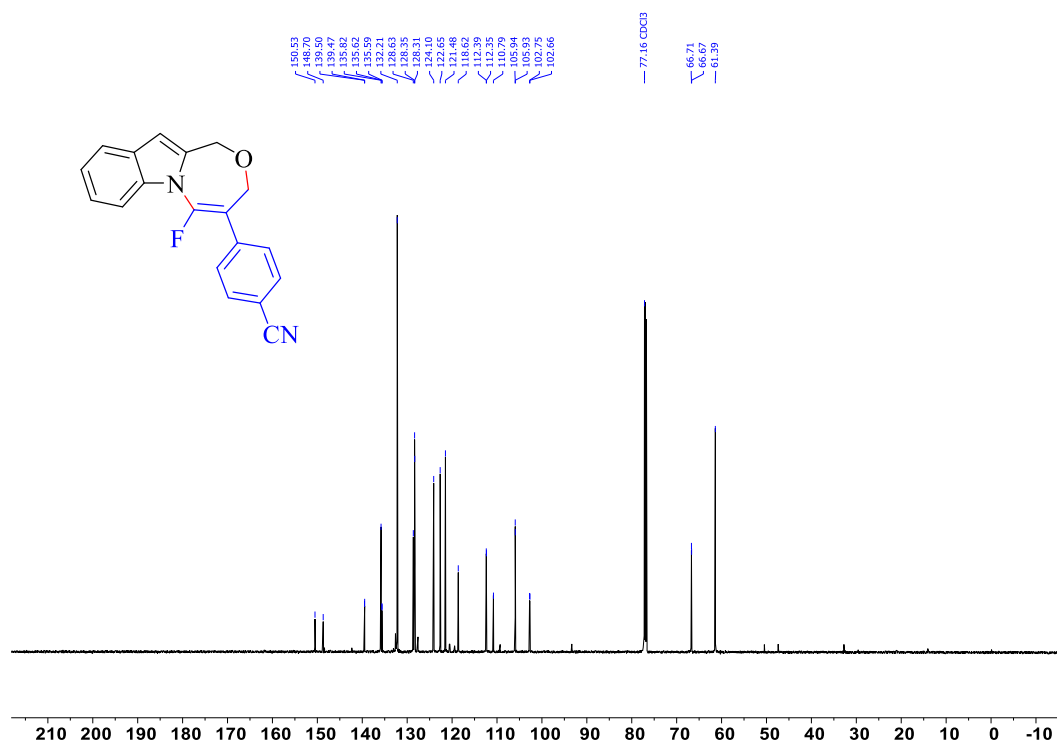

$^{19}\text{F}$ -NMR spectrum of product **7g** in  $\text{CDCl}_3$  (565 MHz)

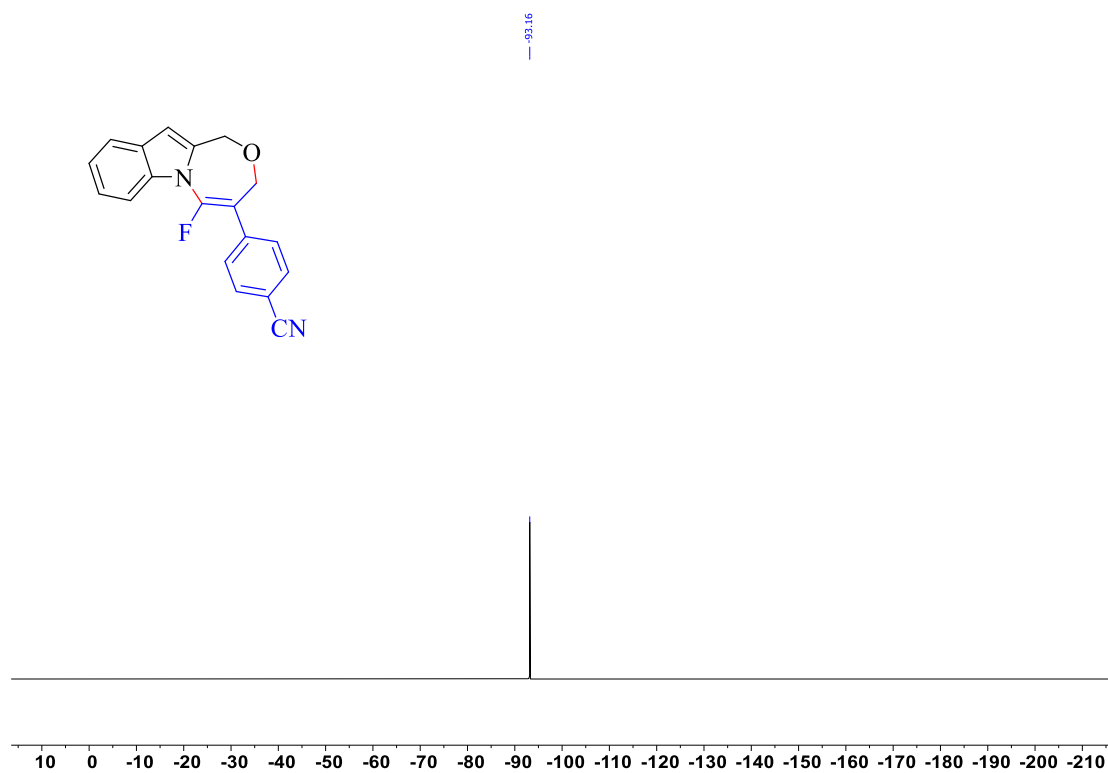

$^1\text{H}$  NMR spectrum of product **7h** in  $\text{CDCl}_3$  (600 MHz)

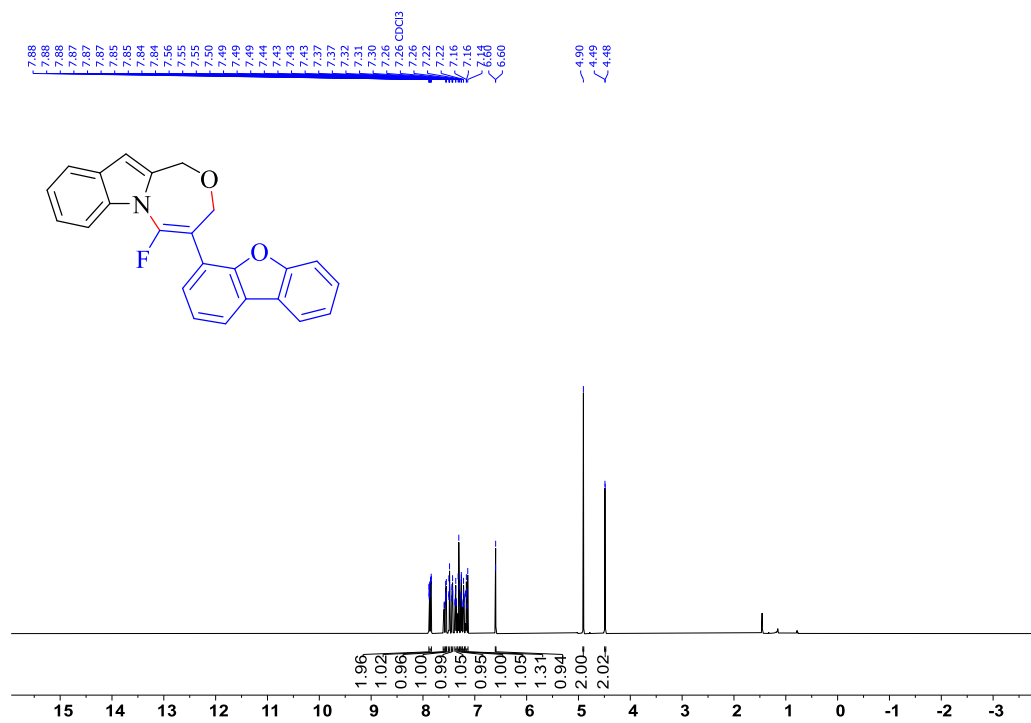

$^{13}\text{C}$  NMR spectrum of product **7h** in  $\text{CDCl}_3$  (151 MHz)

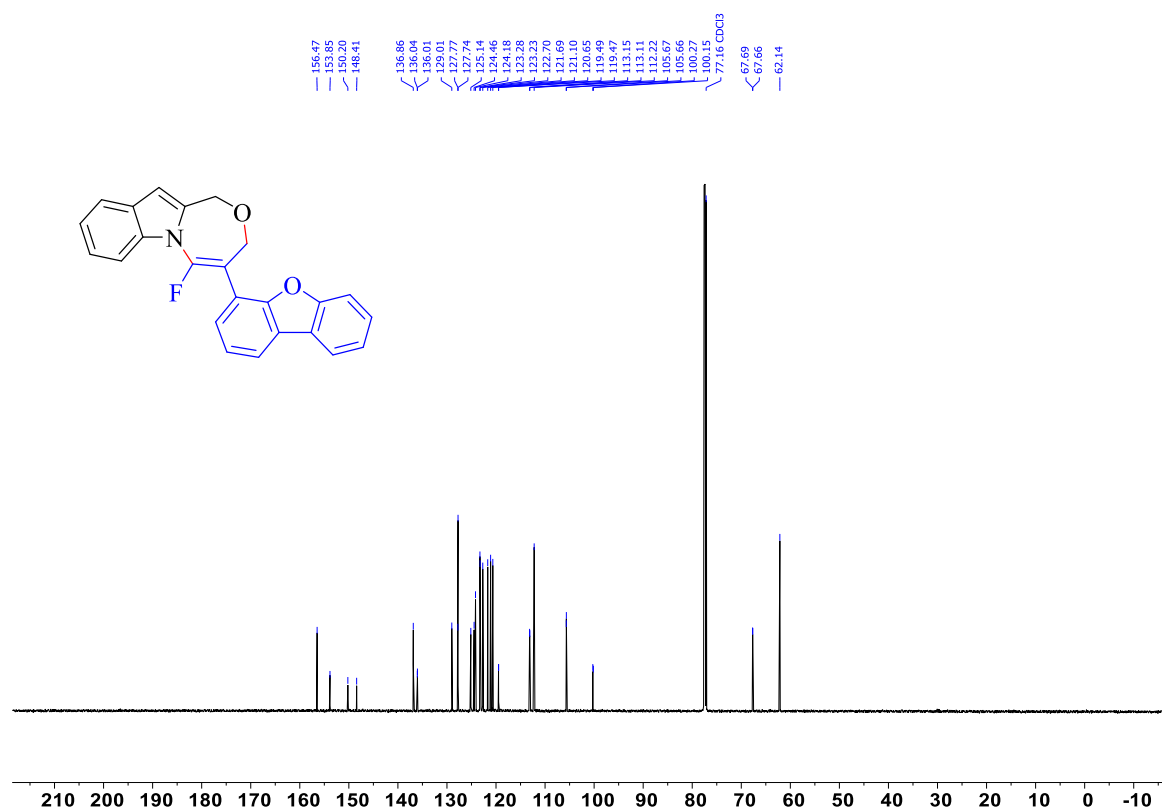

$^{19}\text{F}$ -NMR spectrum of product **7h** in  $\text{CDCl}_3$  (565 MHz)

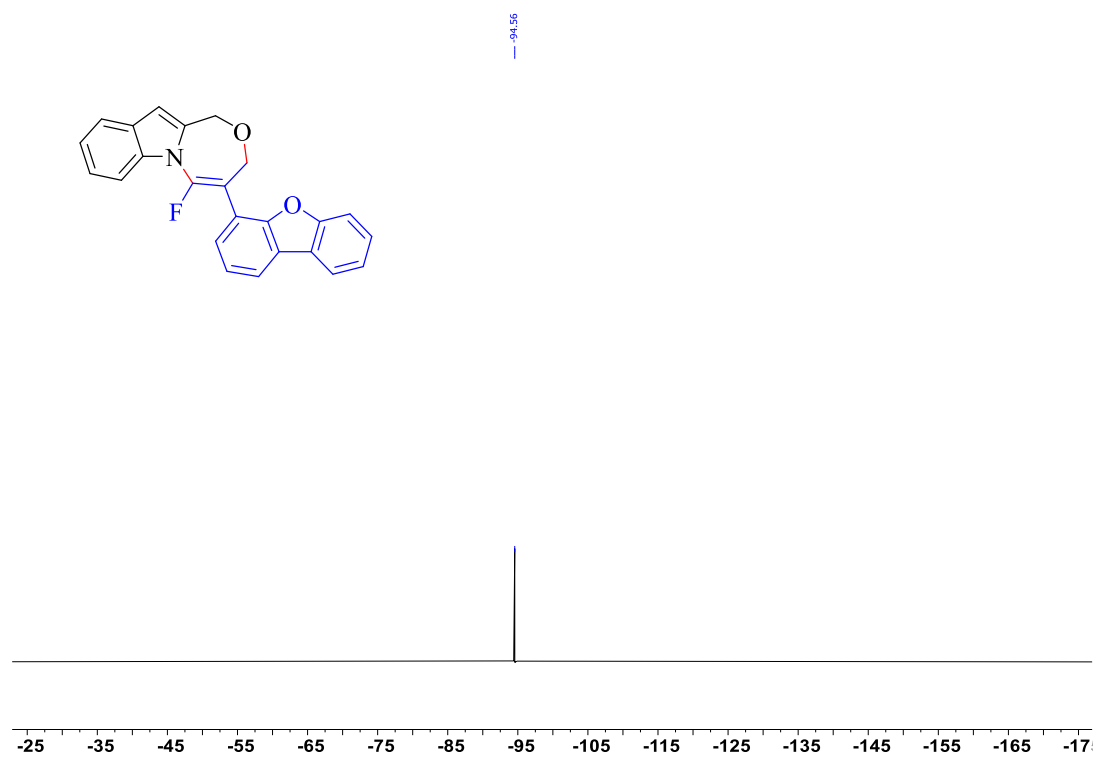

$^1\text{H}$  NMR spectrum of product **7i** in  $\text{CDCl}_3$  (400 MHz)

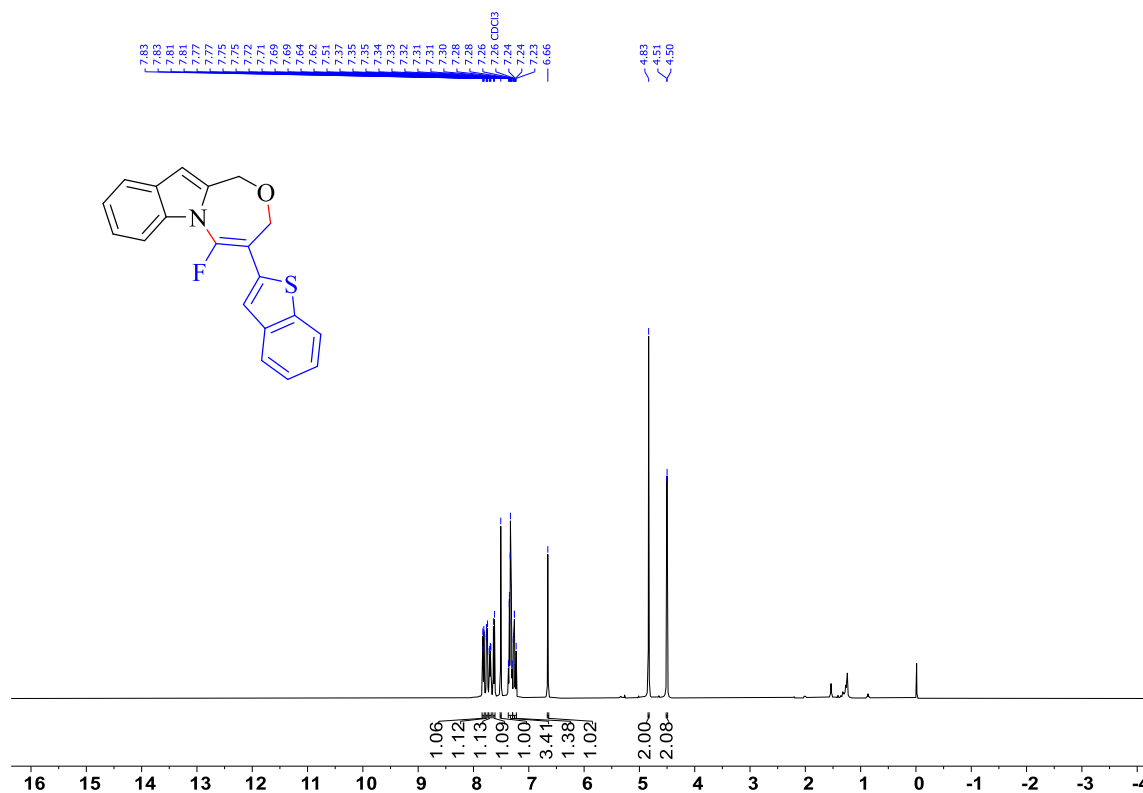

$^{13}\text{C}$  NMR spectrum of product **7i** in  $\text{CDCl}_3$  (151 MHz)

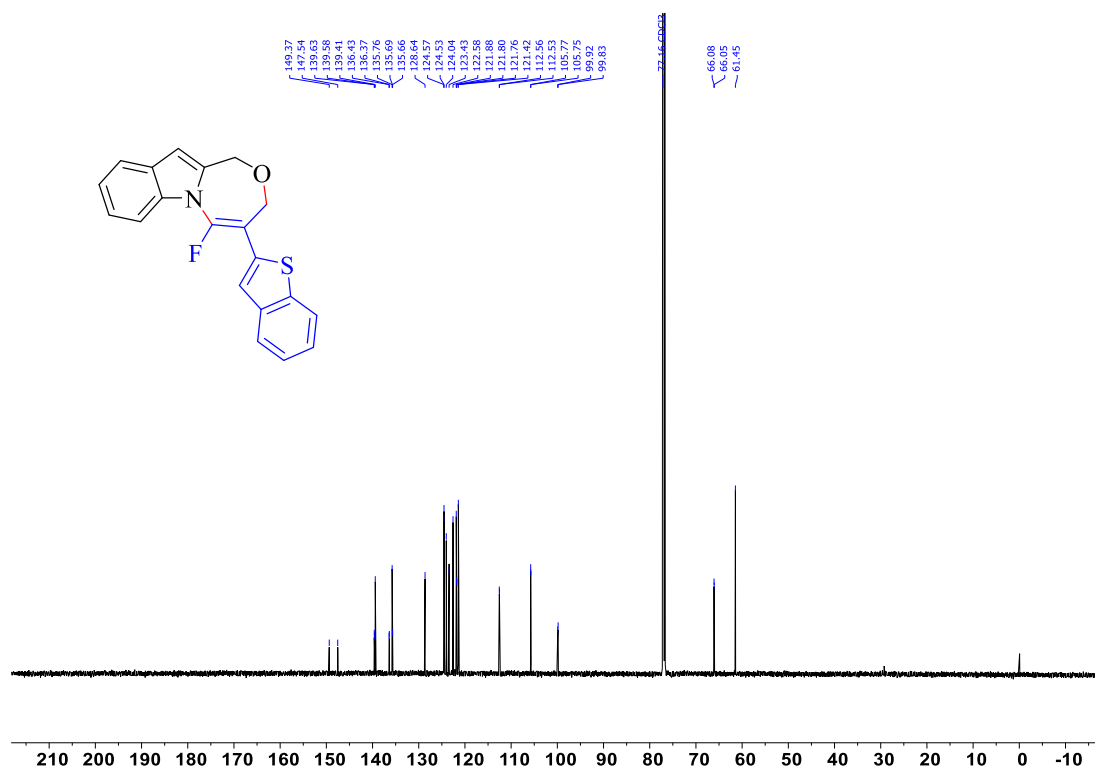

$^{19}\text{F}$ -NMR spectrum of product **7i** in  $\text{CDCl}_3$  (565 MHz)

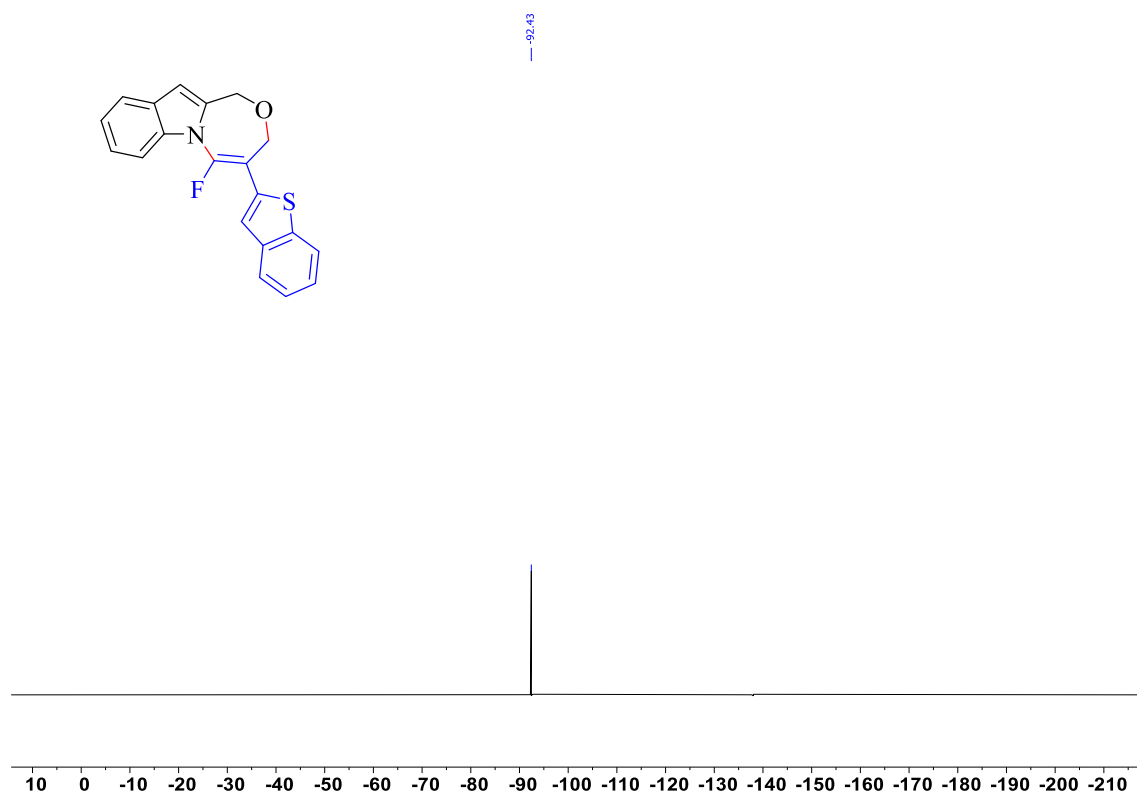

$^1\text{H}$  NMR spectrum of product **7j** in  $\text{CDCl}_3$  (600 MHz)

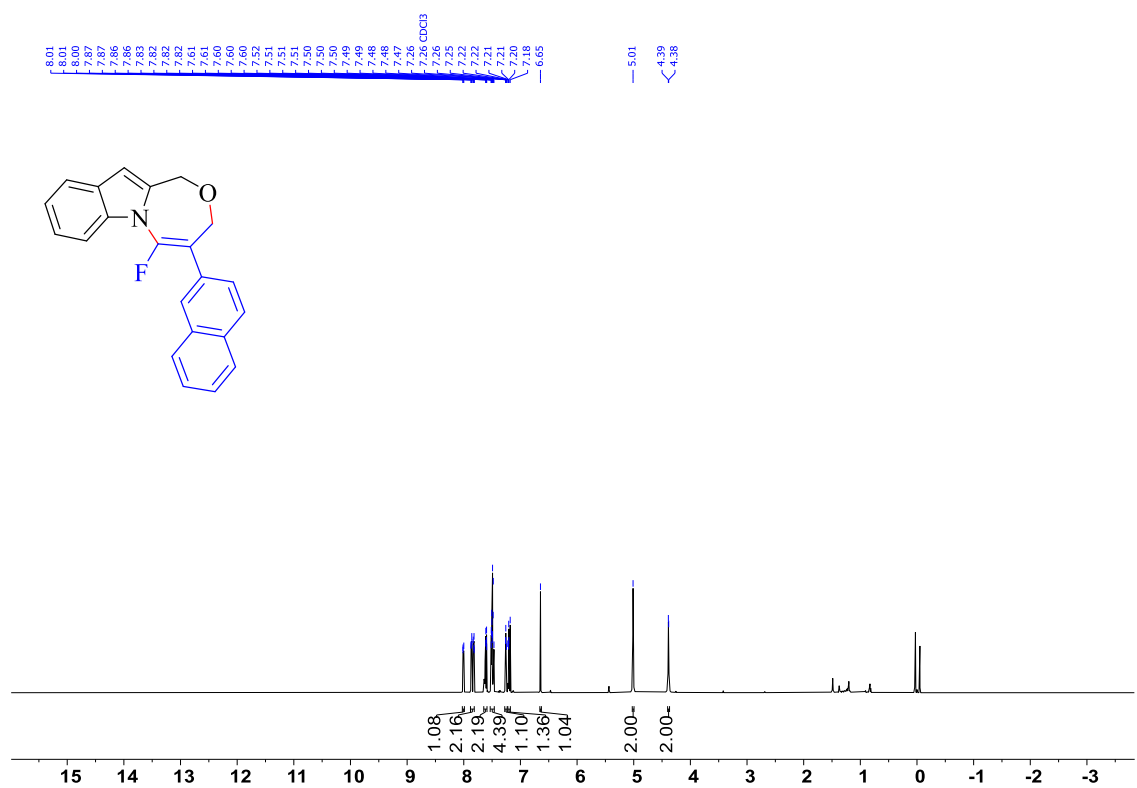



$^{13}\text{C}$  NMR spectrum of product **7j** in  $\text{CDCl}_3$  (151 MHz)

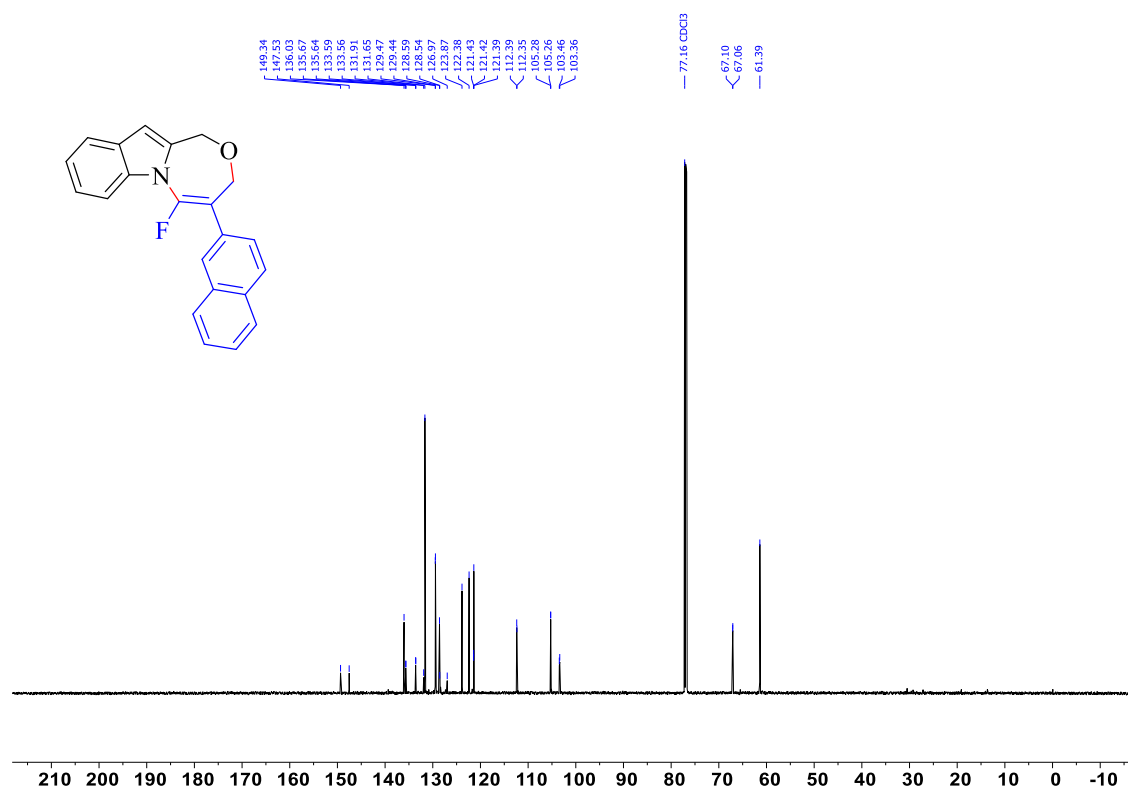

$^{19}\text{F}$ -NMR spectrum of product **7j** in  $\text{CDCl}_3$  (565 MHz)

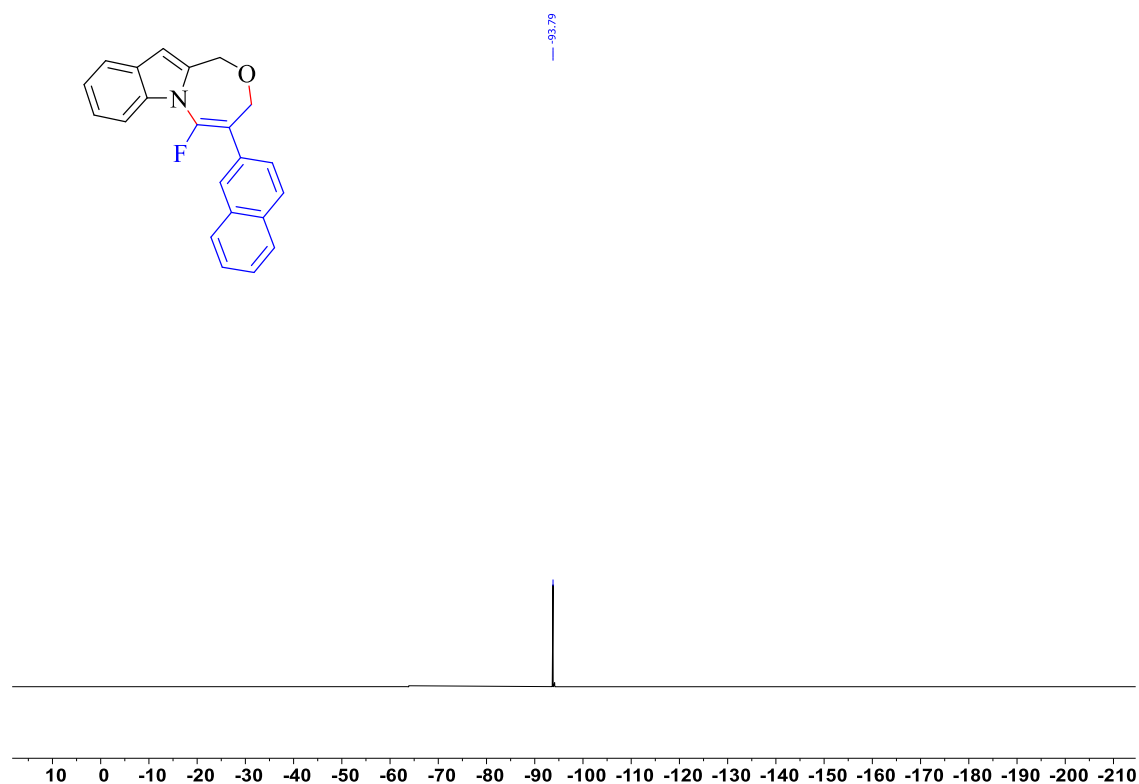

$^1\text{H}$  NMR spectrum of product **7k** in  $\text{CDCl}_3$  (600 MHz)

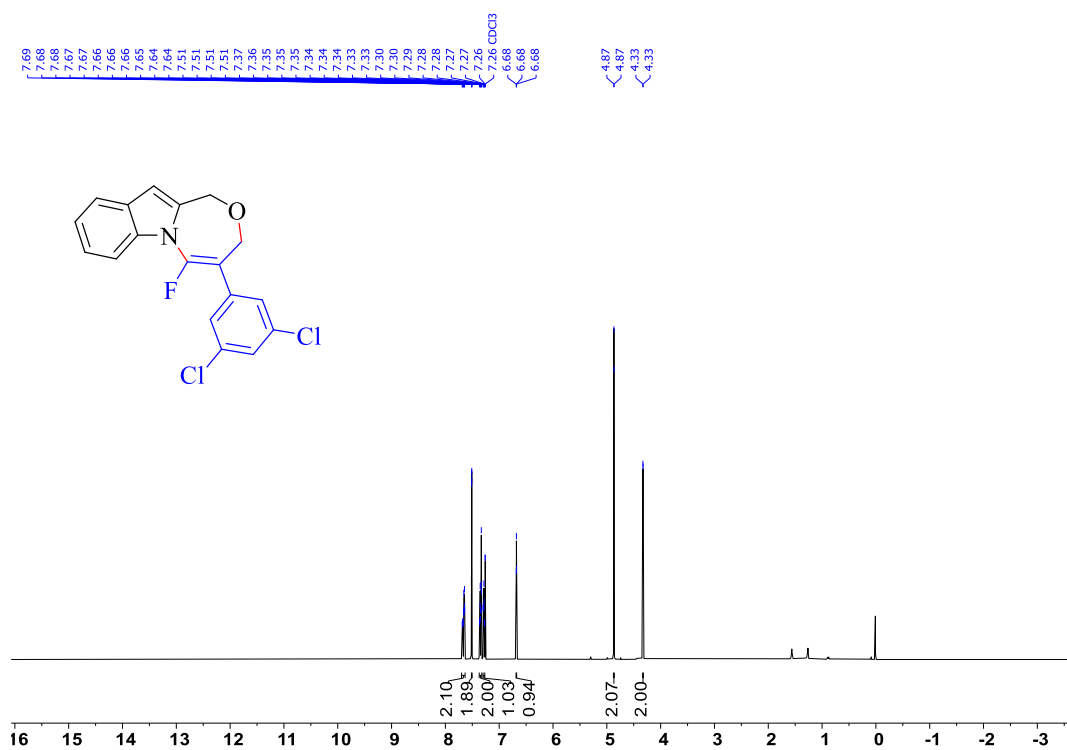

$^{13}\text{C}$  NMR spectrum of product **7k** in  $\text{CDCl}_3$  (151 MHz)

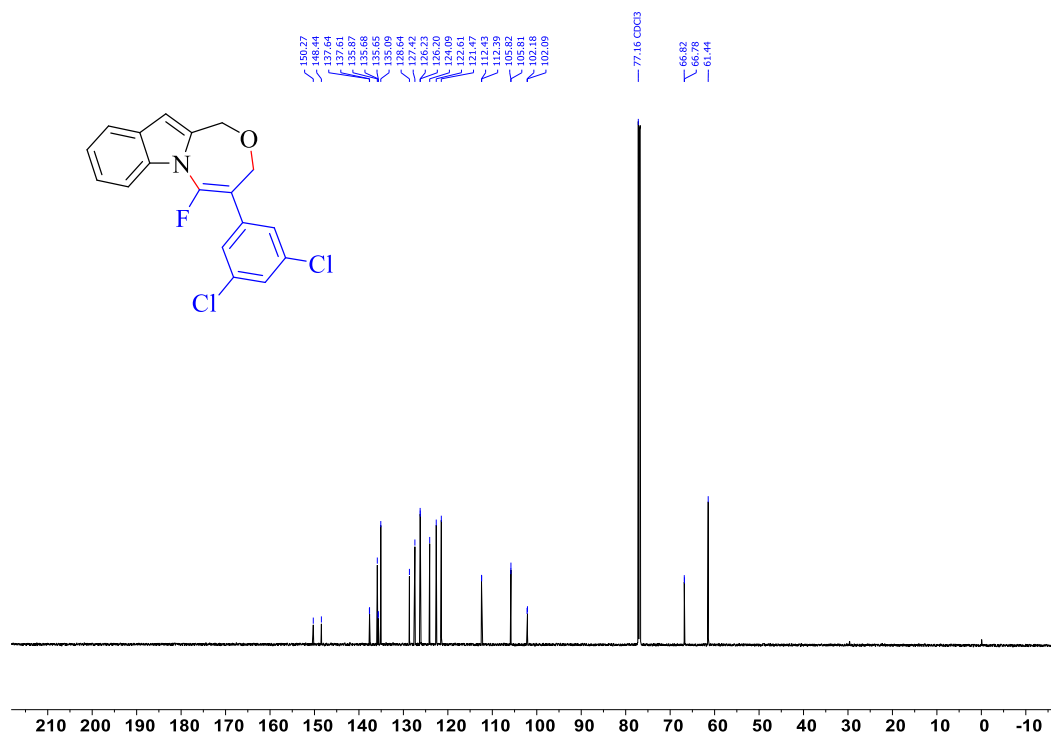

$^{19}\text{F}$ -NMR spectrum of product **7k** in  $\text{CDCl}_3$  (565 MHz)

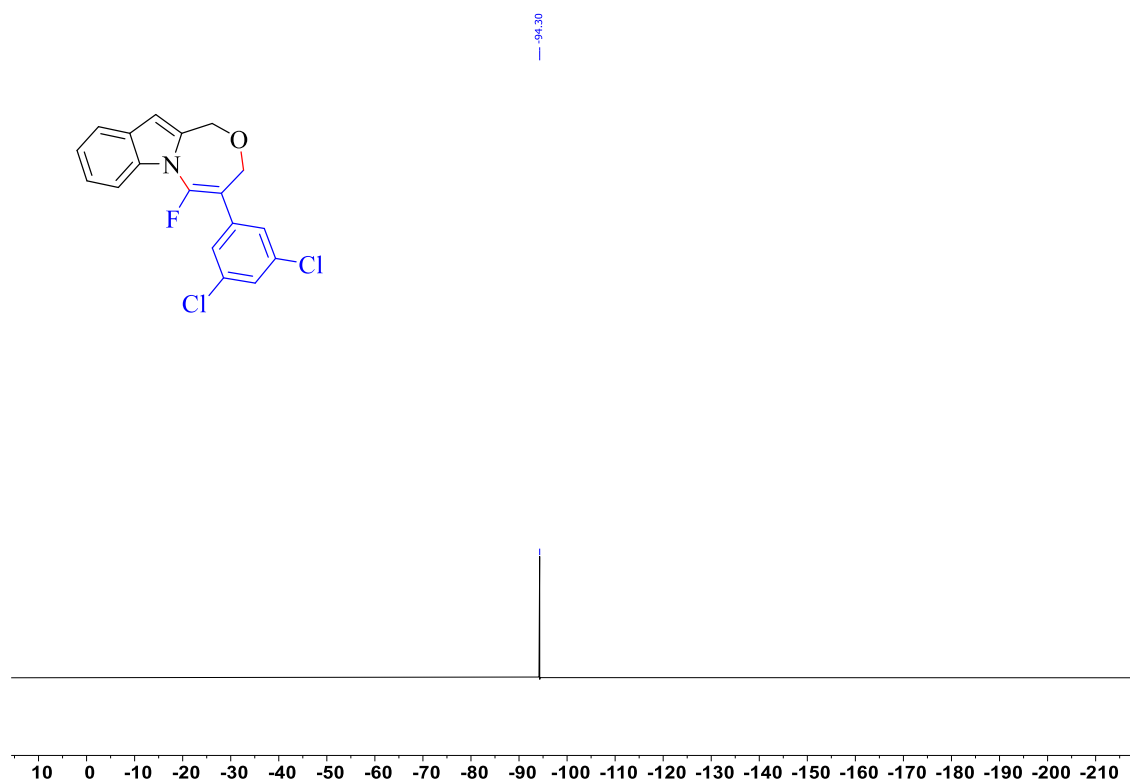

$^1\text{H}$  NMR spectrum of product **8** in  $\text{CDCl}_3$  (600 MHz)

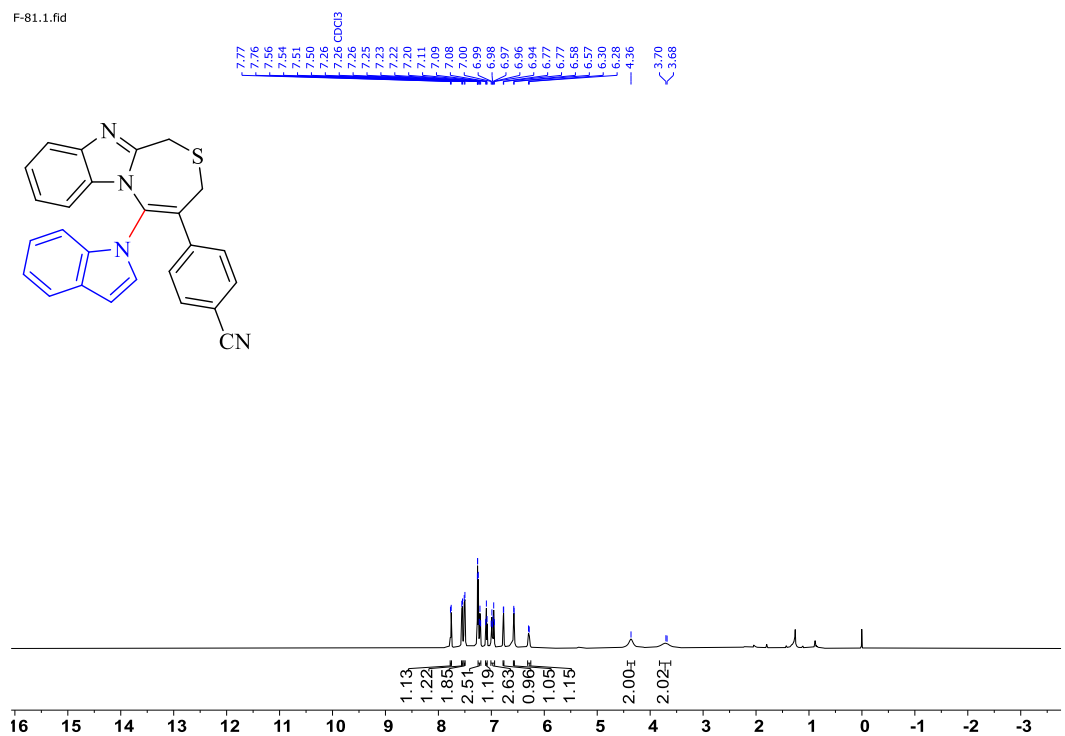

$^{13}\text{C}$  NMR spectrum of product **8** in  $\text{CDCl}_3$  (151 MHz)

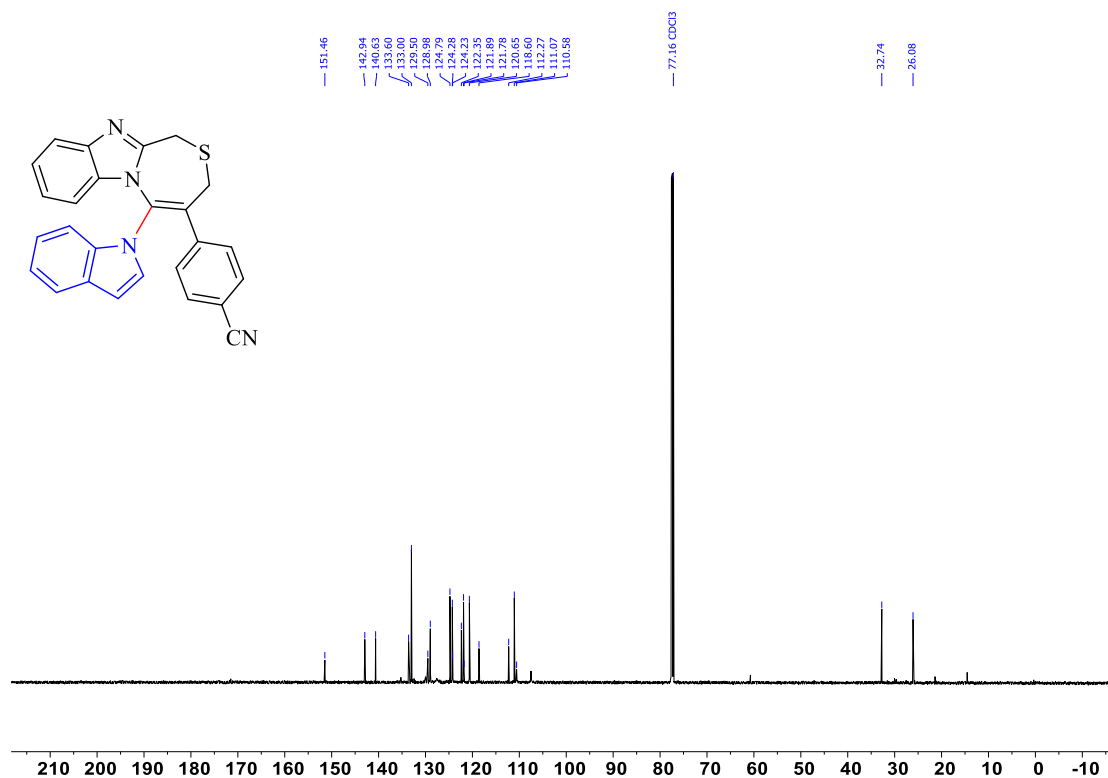

$^1\text{H}$  NMR spectrum of product **10** in  $\text{CDCl}_3$  (600 MHz)

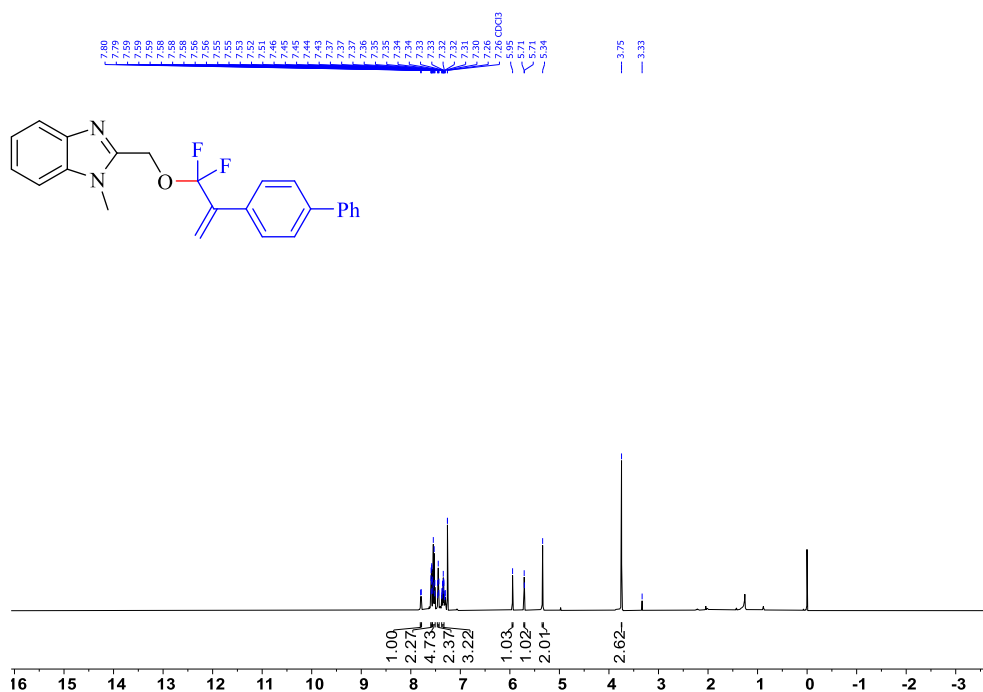

$^{13}\text{C}$  NMR spectrum of product **10** in  $\text{CDCl}_3$  (151 MHz)

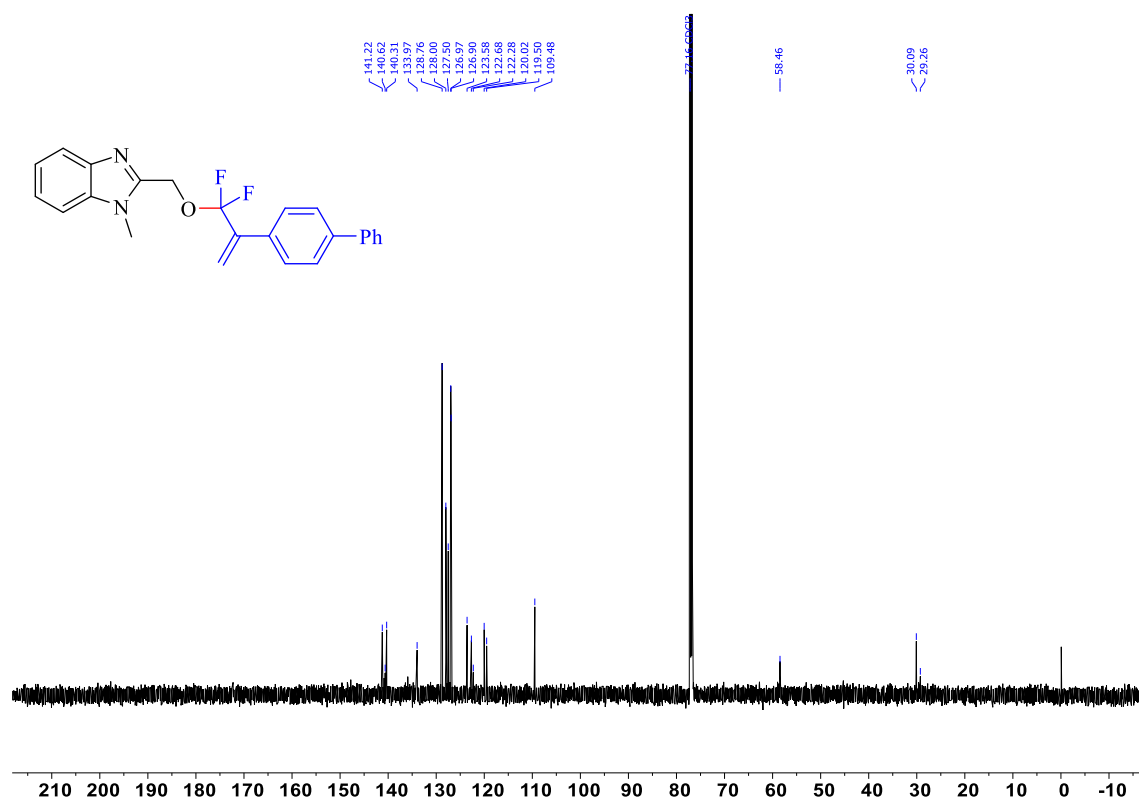

$^{19}\text{F}$ -NMR spectrum of product **10** in  $\text{CDCl}_3$  (565 MHz)

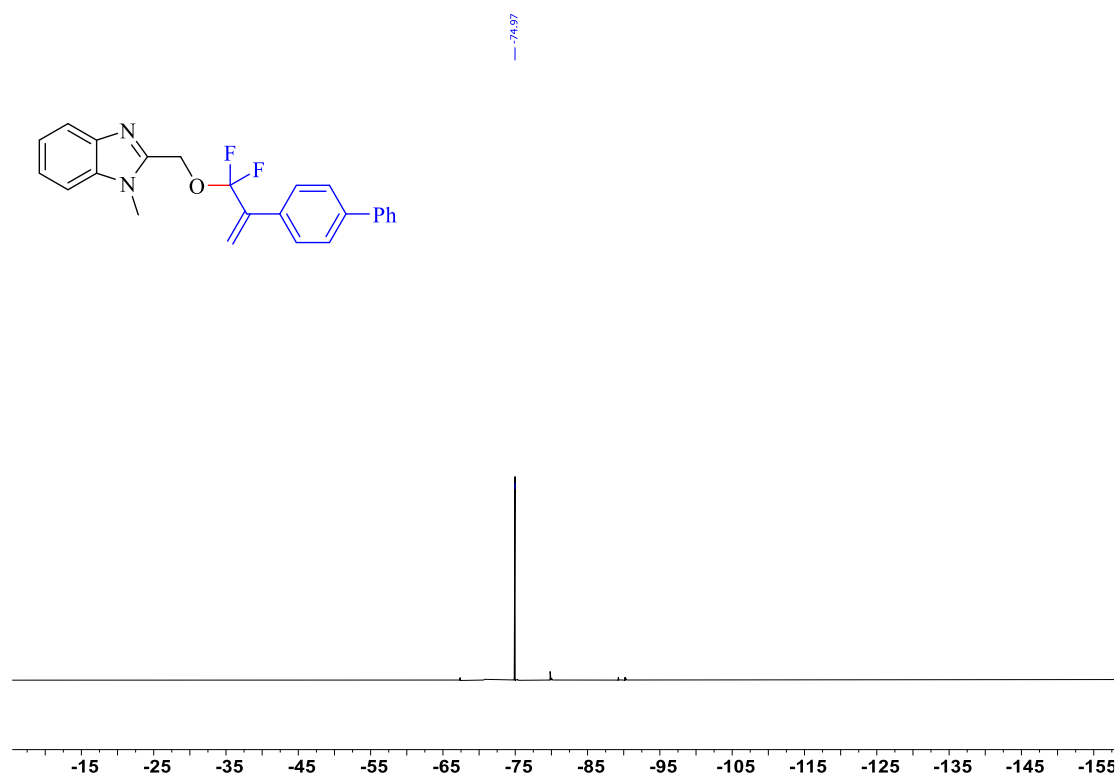

$^1\text{H}$  NMR spectrum of product **12** in  $\text{CDCl}_3$  (600 MHz)

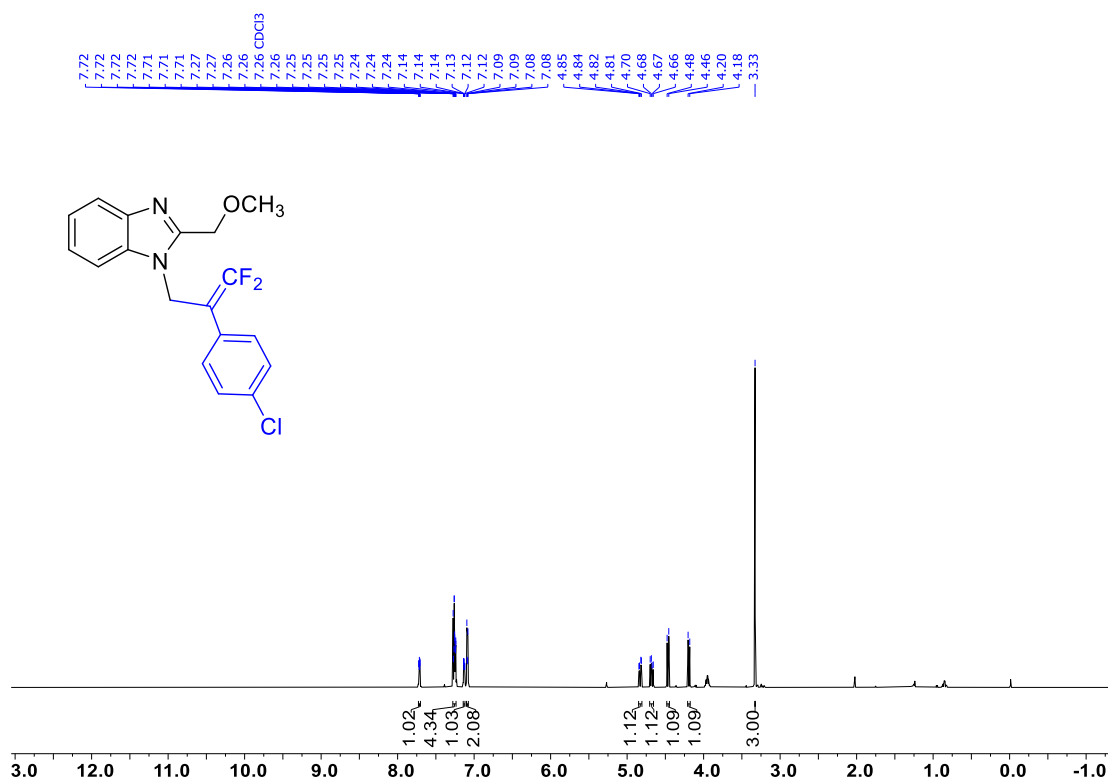

$^{13}\text{C}$  NMR spectrum of product **12** in  $\text{CDCl}_3$  (101 MHz)

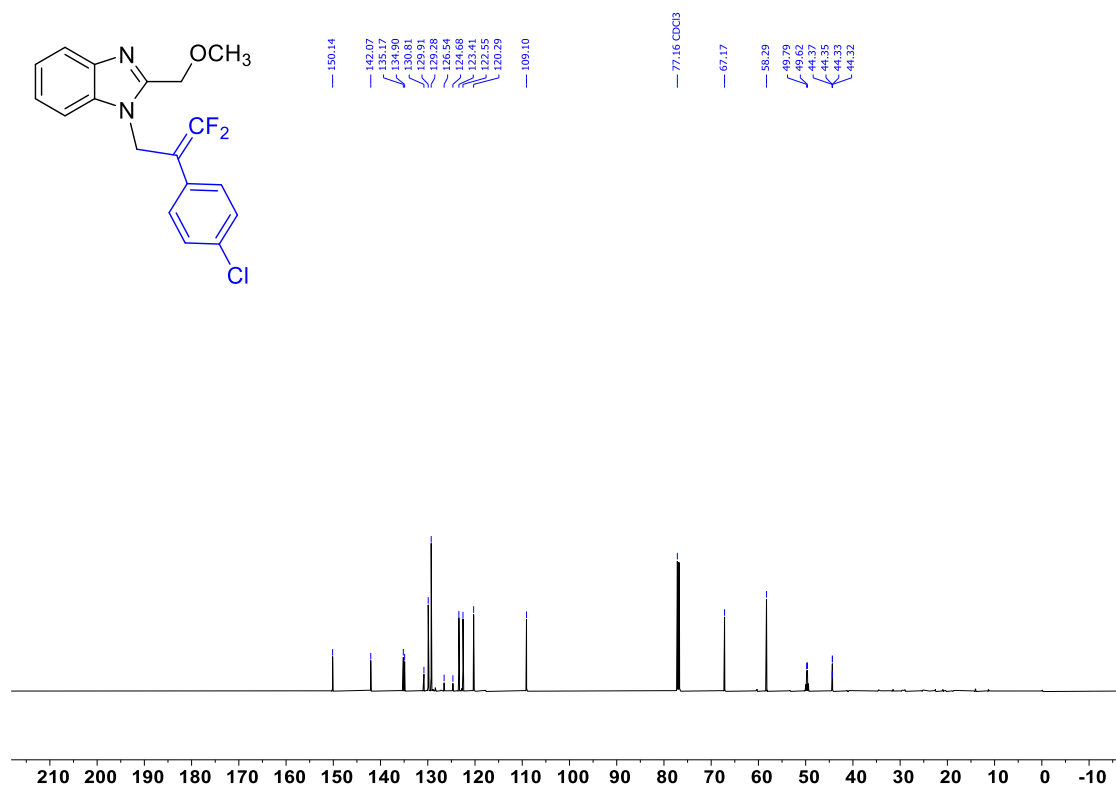

$^{19}\text{F}$ -NMR spectrum of product **12** in  $\text{CDCl}_3$  (565 MHz)

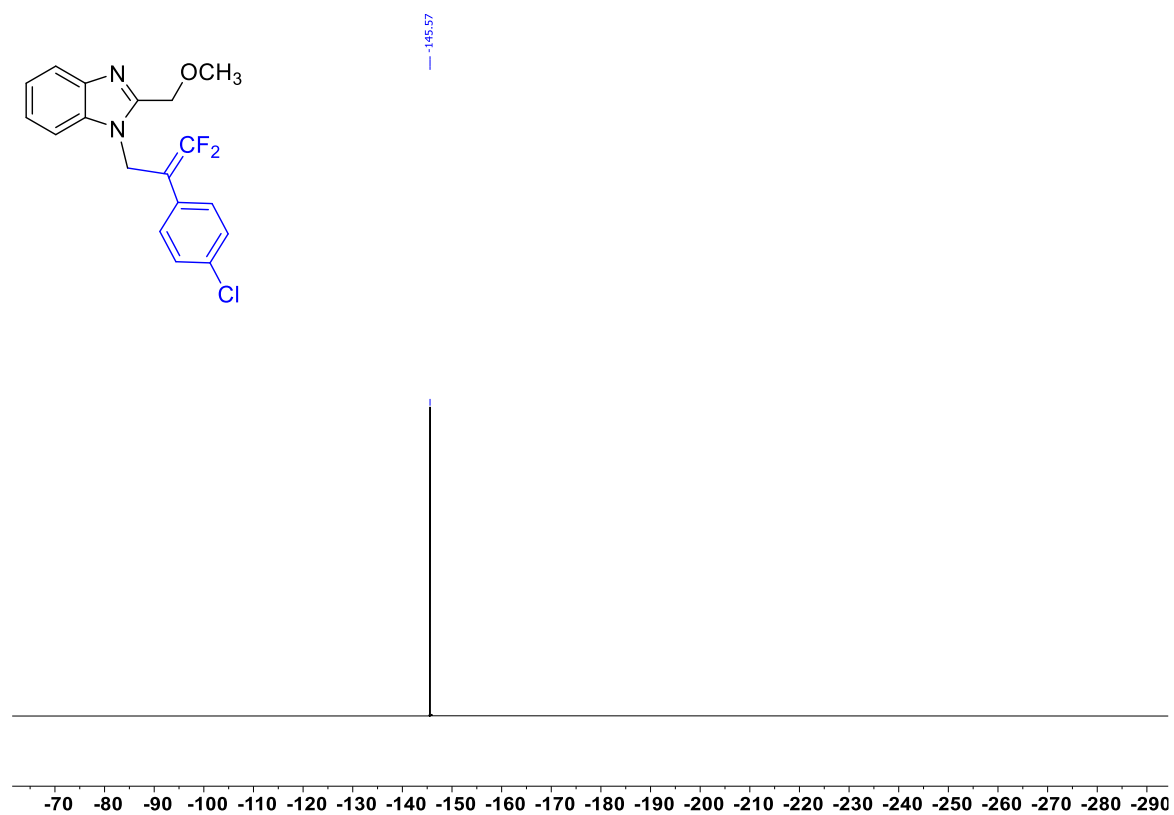

Supplement: d5qo01324k1.pdf [file d5qo01324k1.pdf]
